# Supplementary material
Source: MDPI journal article supplement (https://www.mdpi.com/2673-4079/3/3/19)

# Fast and efficient mechanosynthesis of aldonamides by aminolysis of unprotected sugar lactones

Abed Bil <sup>1</sup>, Bemba Abdellahi <sup>1</sup>, Gwladys Pourceau <sup>1,\*</sup> and Anne Wadouachi <sup>1,\*</sup>

<sup>1</sup> Laboratoire de Glycochimie, des Antimicrobiens et des Agroressources (LG2A) CNRS UMR 7378. Université de Picardie Jules Verne, Institut de Chimie de Picardie CNRS FR 3085, 33 rue Saint Leu FR-80039 Amiens Cedex, France. abed.bil@u-picardie.fr (AB), bemba.abdellahi@u-picardie.fr (BA), gwladys.pourceau@u-picardie.fr (GP), anne.wadouachi@u-picardie.fr (AW)

\* Correspondence: gwladys.pourceau@u-picardie.fr (GP), anne.wadouachi@u-picardie.fr (AW)

**<sup>1</sup>H and <sup>13</sup>C NMR spectra of the 1a, 3a, 4a, 4c-4h, 4k-l crudes obtained using “optimized conditions”** (*i.e.* : 0.5 g lactone, 1 eq. amine, 0.25 mL H<sub>2</sub>O (LAG), 5 min milling, aqueous treatment)

**-Characterization (<sup>1</sup>H, <sup>13</sup>C, COSY, HSQC NMR analyses, HRMS and FTIR spectra) of the 4b, 4i' et 4j crudes obtained using “optimized conditions”** (*i.e.* : 0.5 g lactone, 1 eq. amine, 0.25 mL H<sub>2</sub>O (LAG), 5 min milling, aqueous treatment)

**Figure S1:  $^1\text{H}$  NMR spectrum of 1a crude**

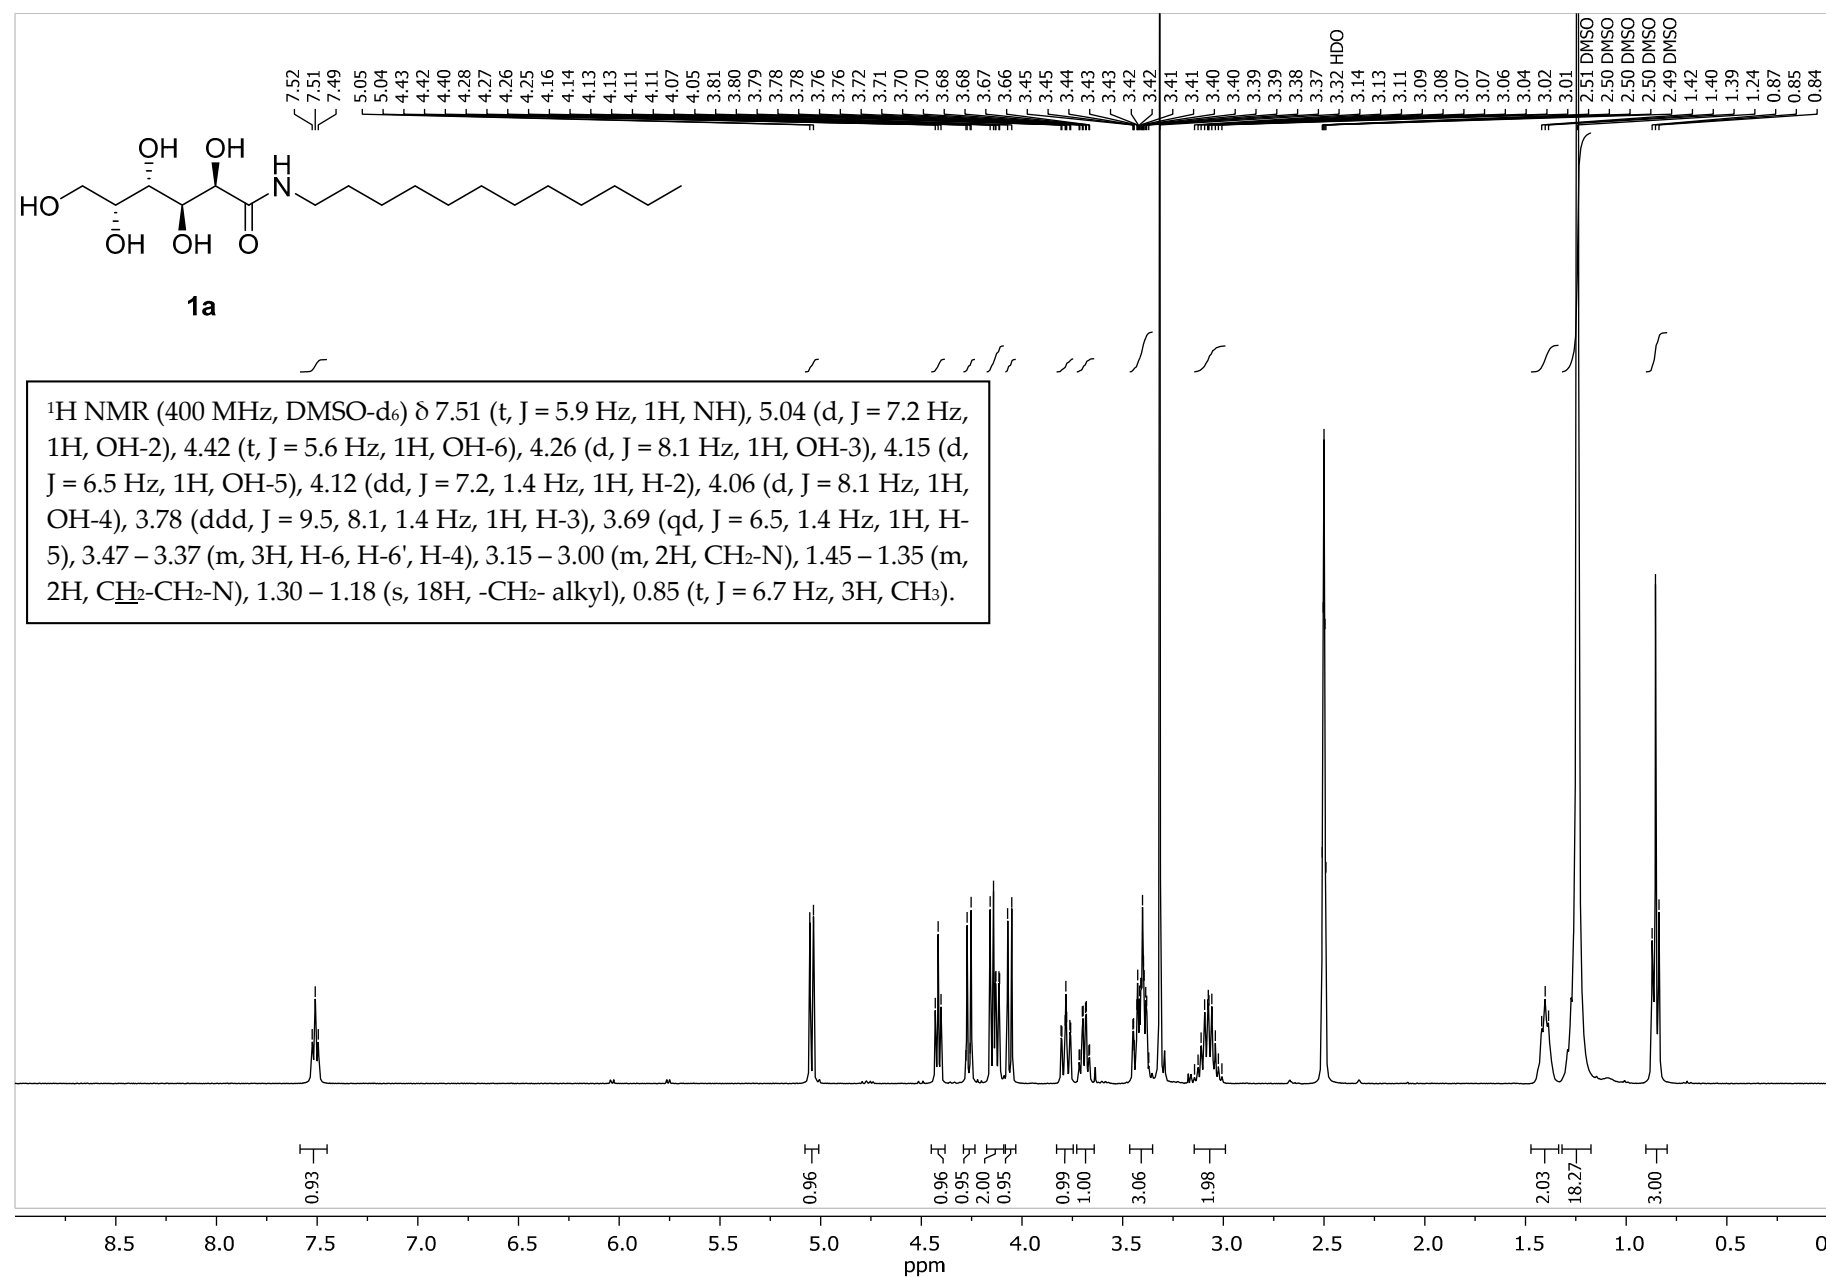

**Figure S2:  $^{13}\text{C}$  NMR spectrum of 1a crude**

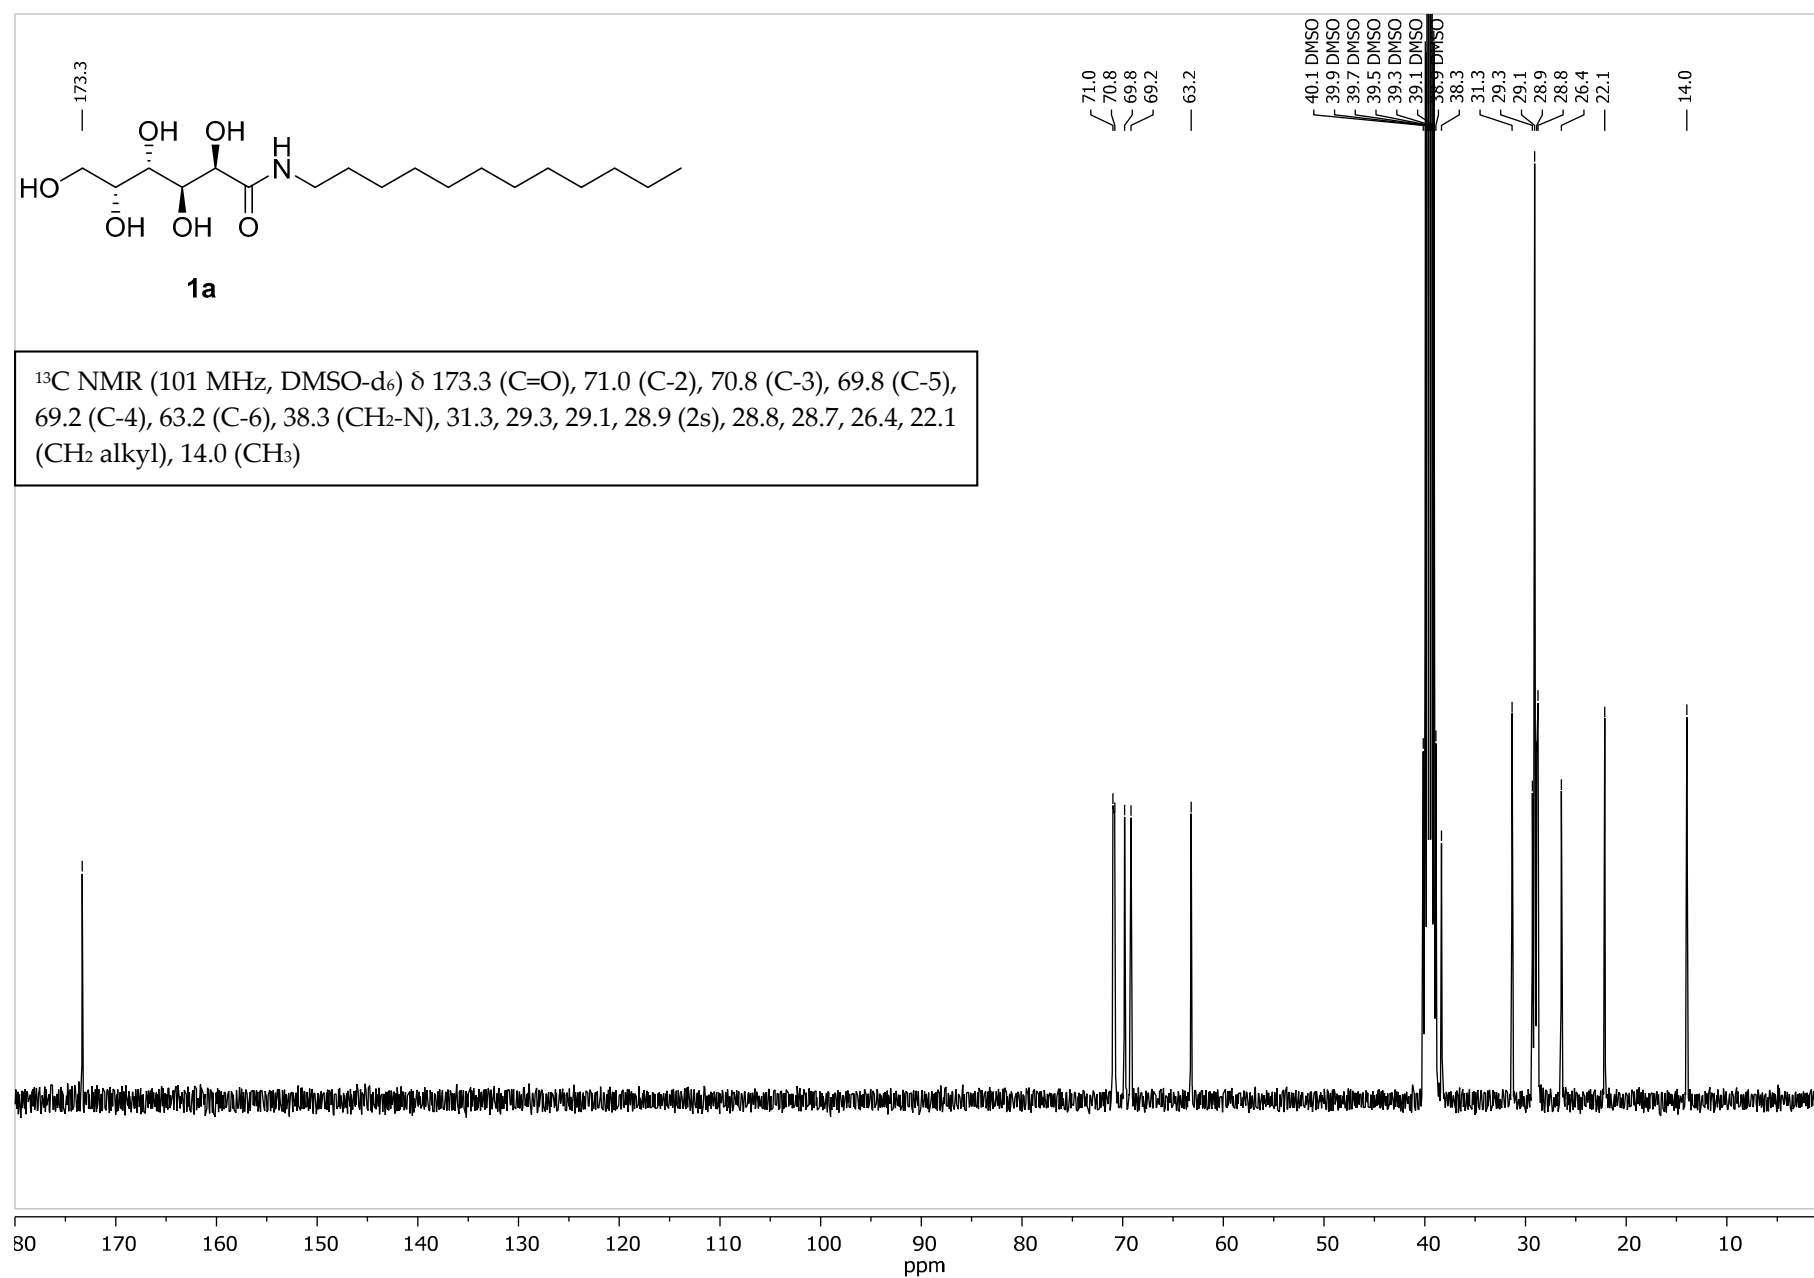

**Figure S3:  $^1\text{H}$  NMR spectrum of 3a crude**

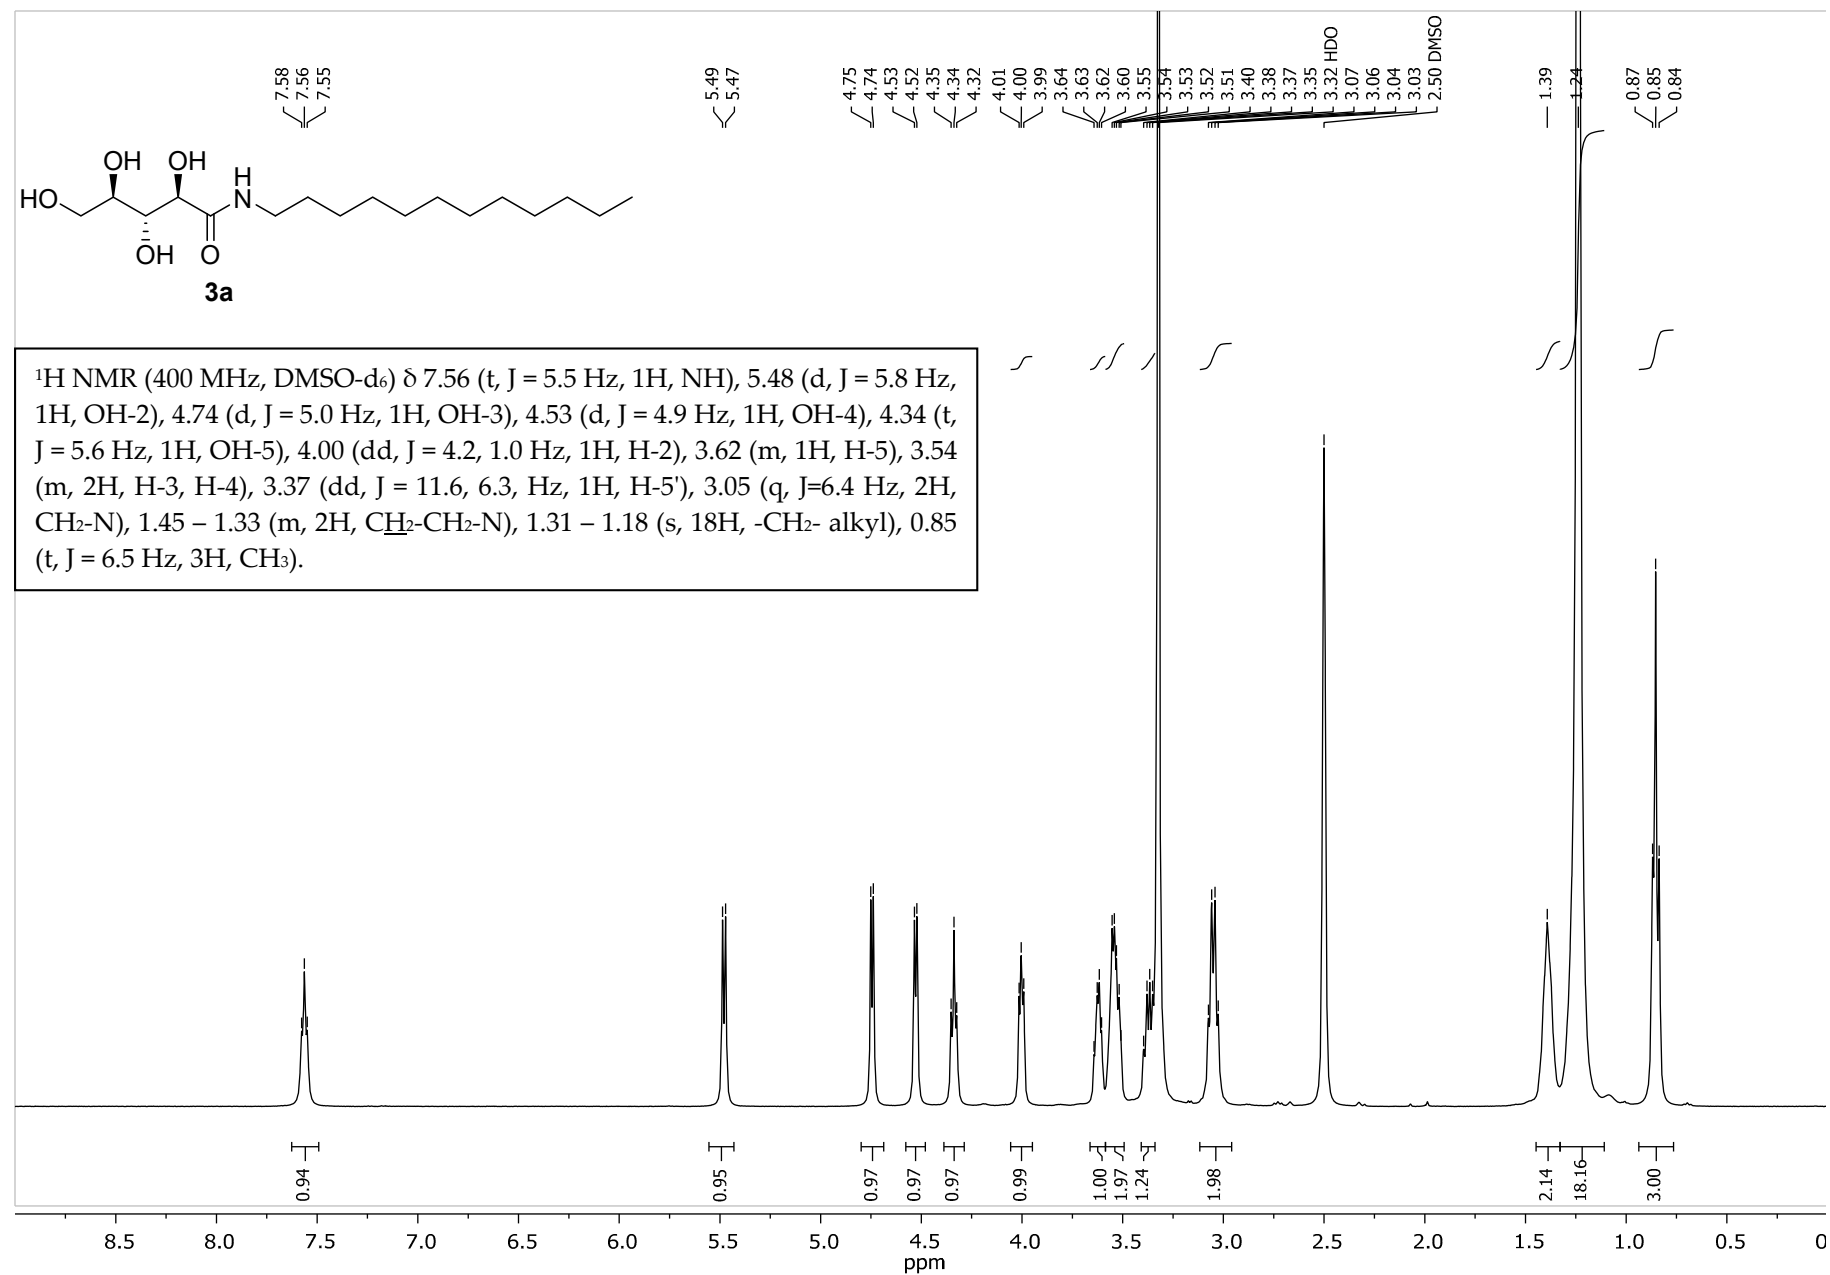

**Figure S4:  $^{13}\text{C}$  NMR spectrum of 3a crude**

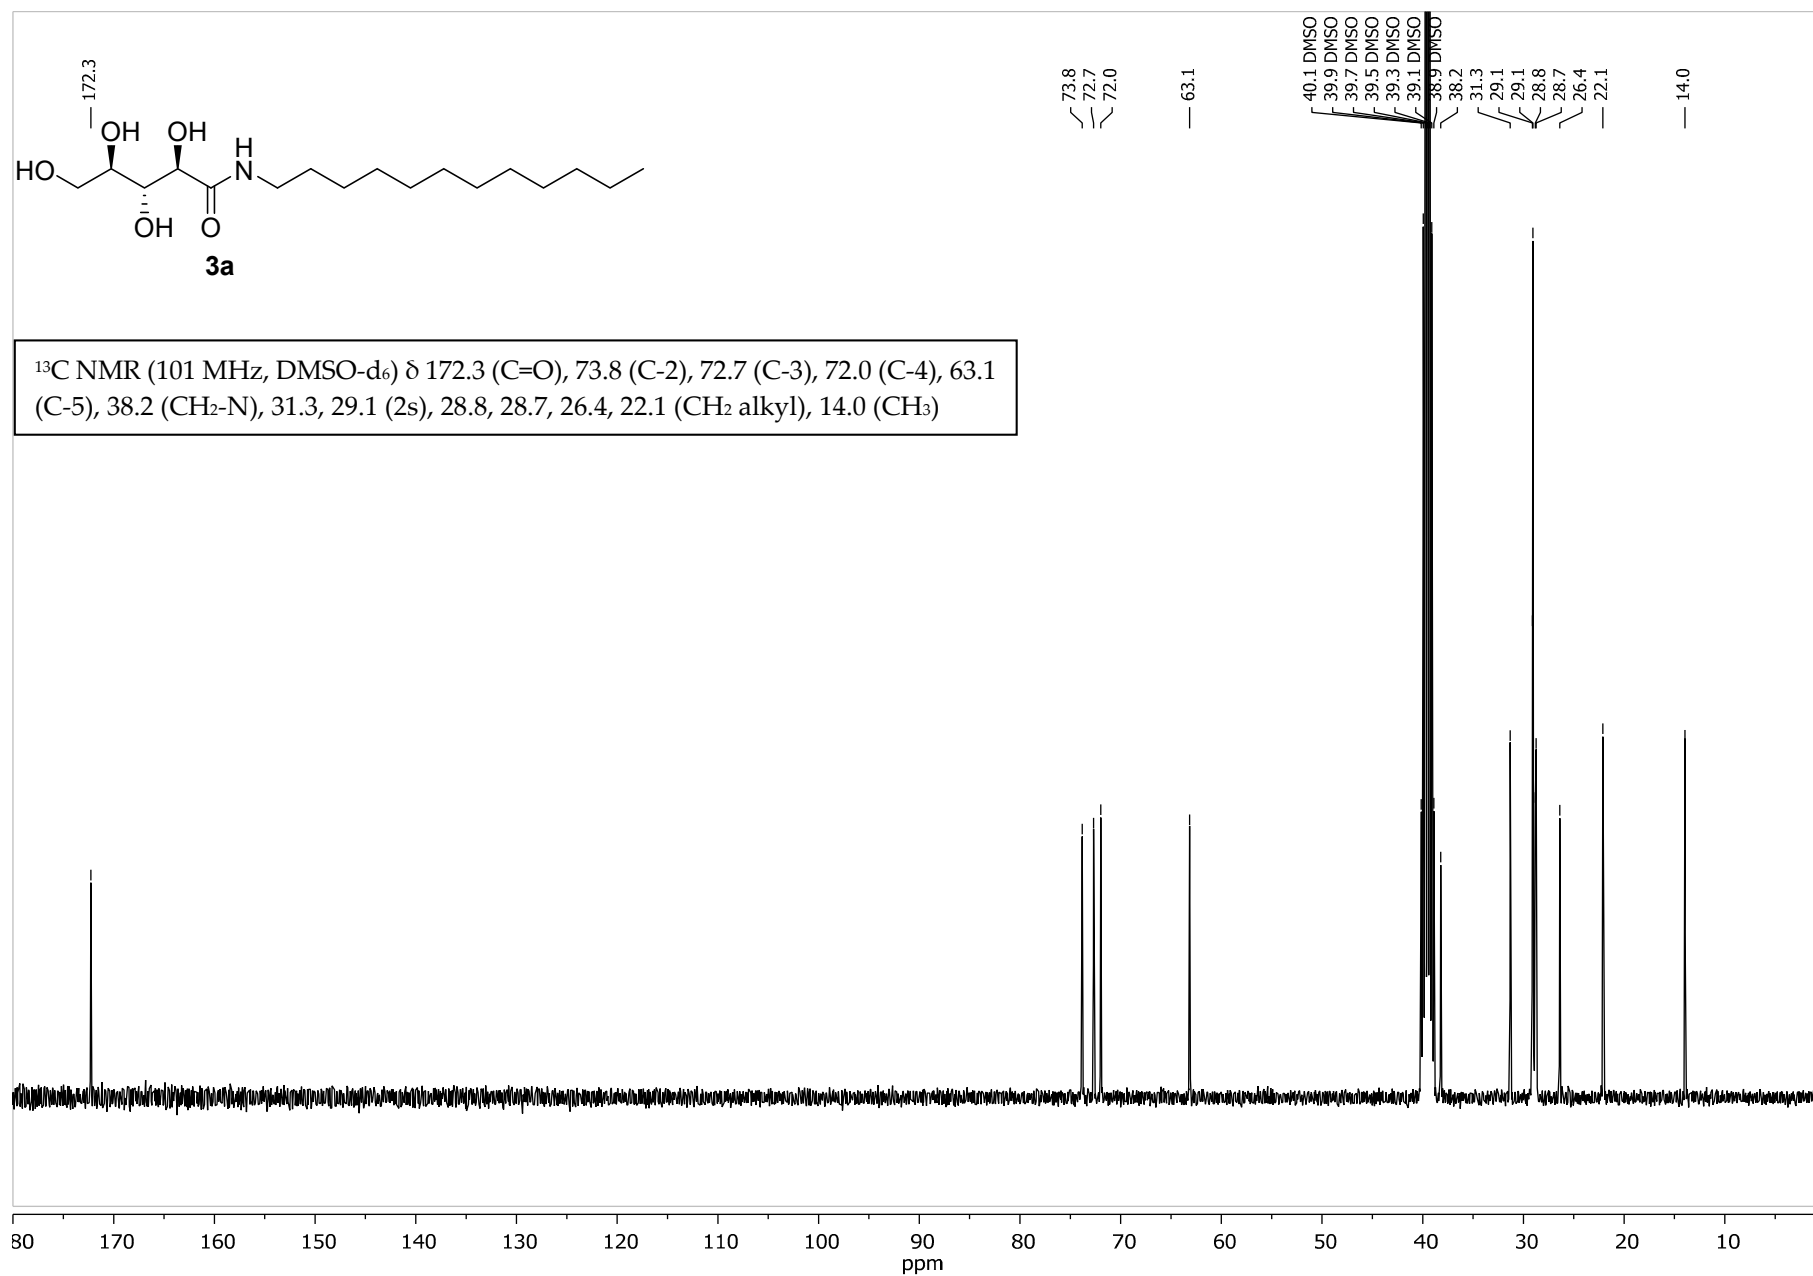

**Figure S5:  $^1\text{H}$  NMR spectrum of 4a crude**

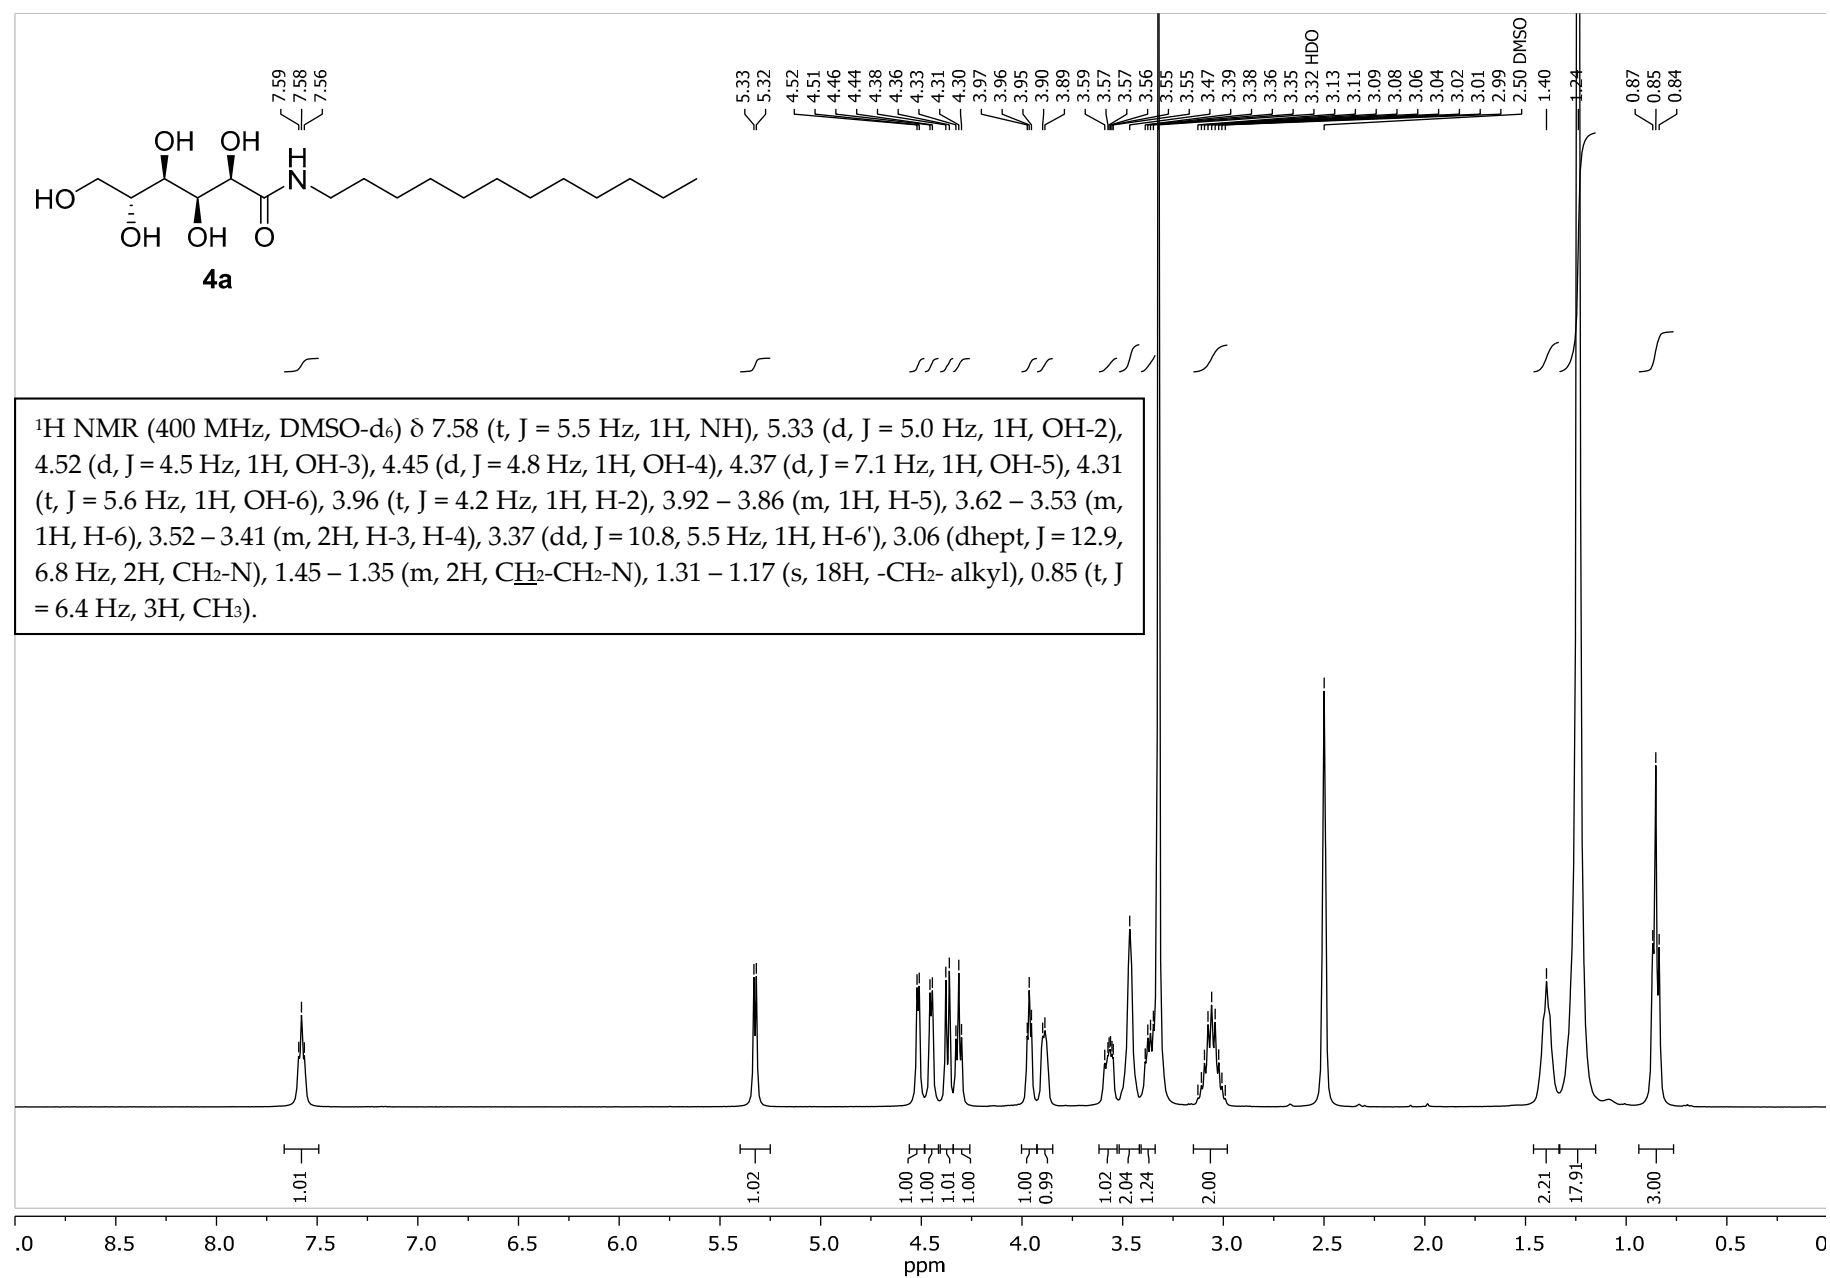

**Figure S6:  $^{13}\text{C}$  NMR spectrum of 4a crude**

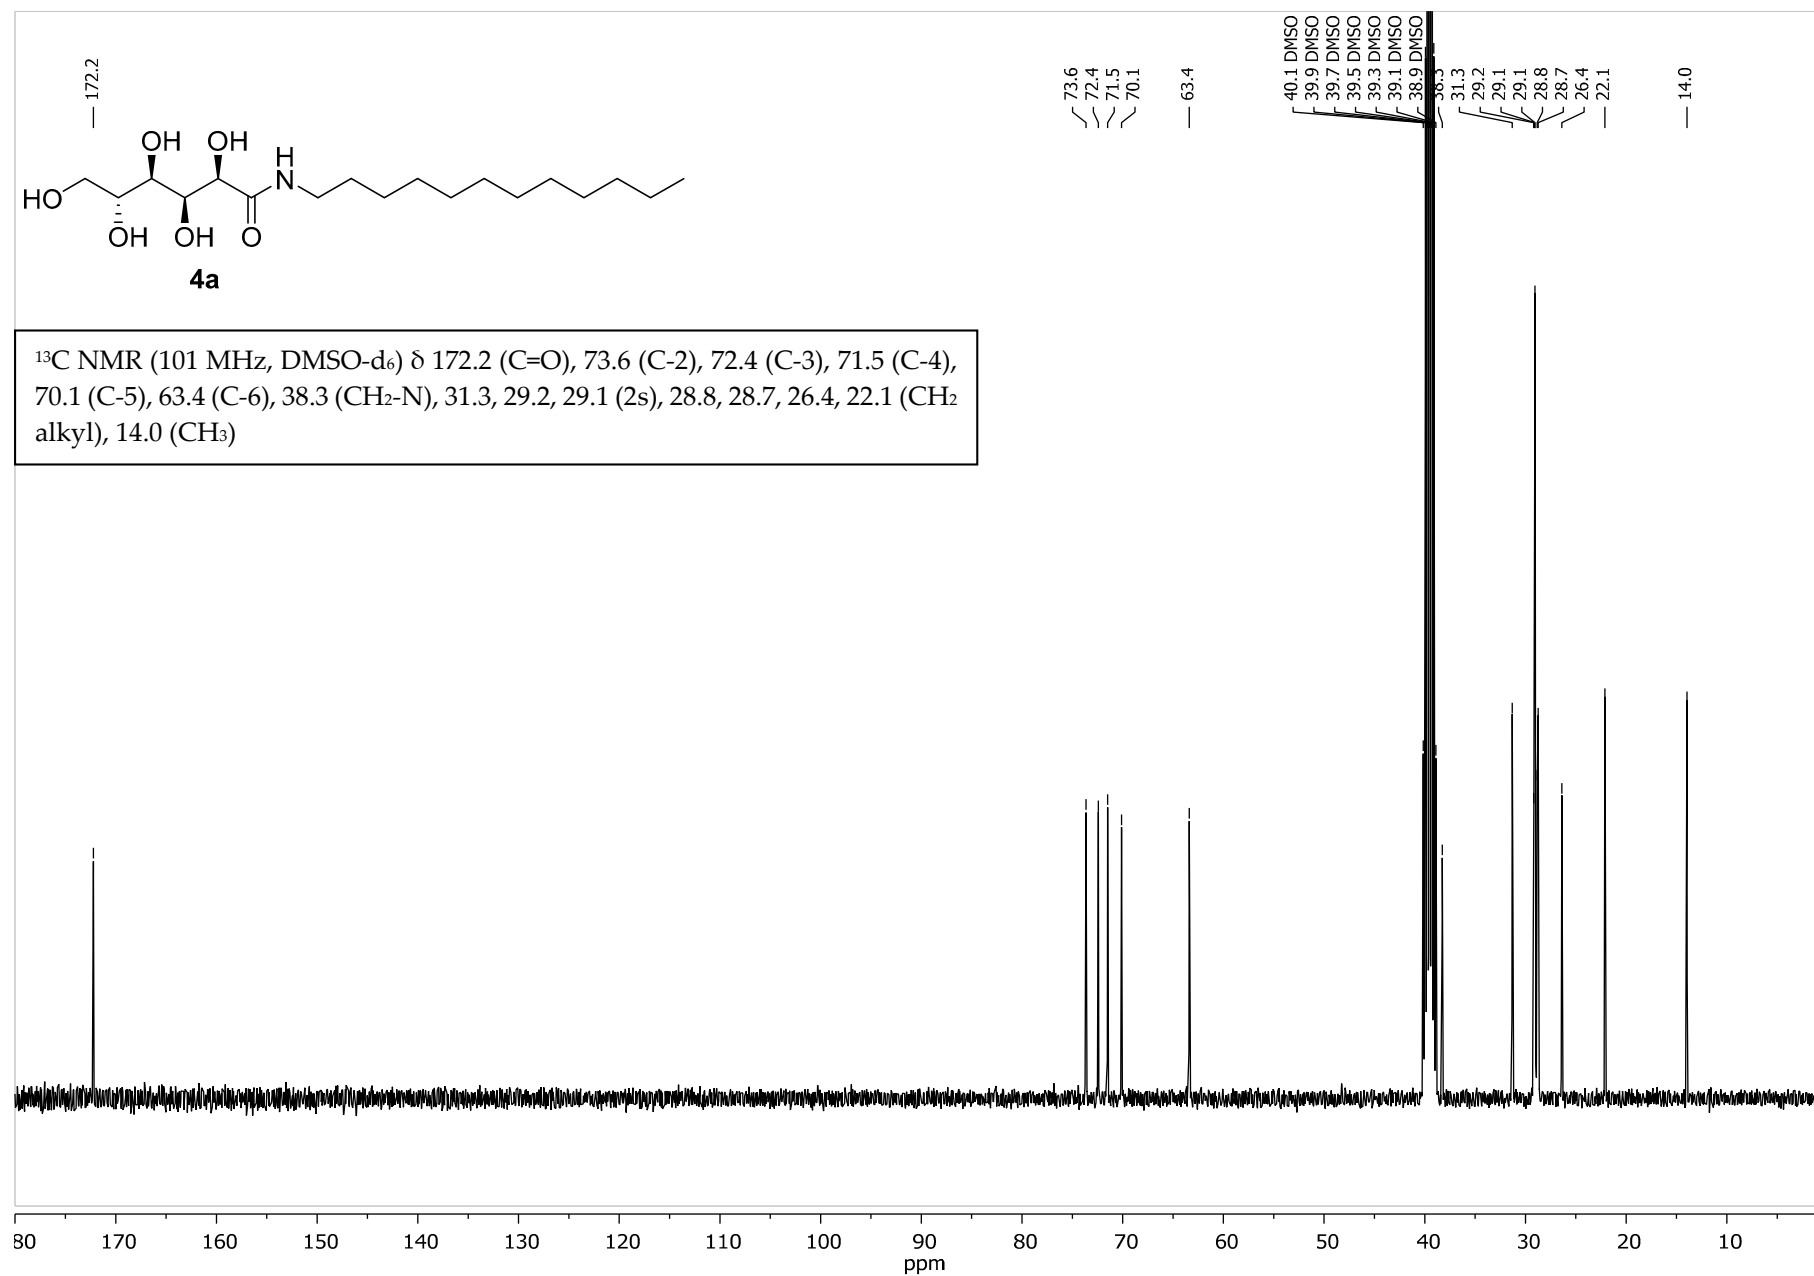

**Figure S7:  $^1\text{H}$  NMR spectrum of 4b crude**

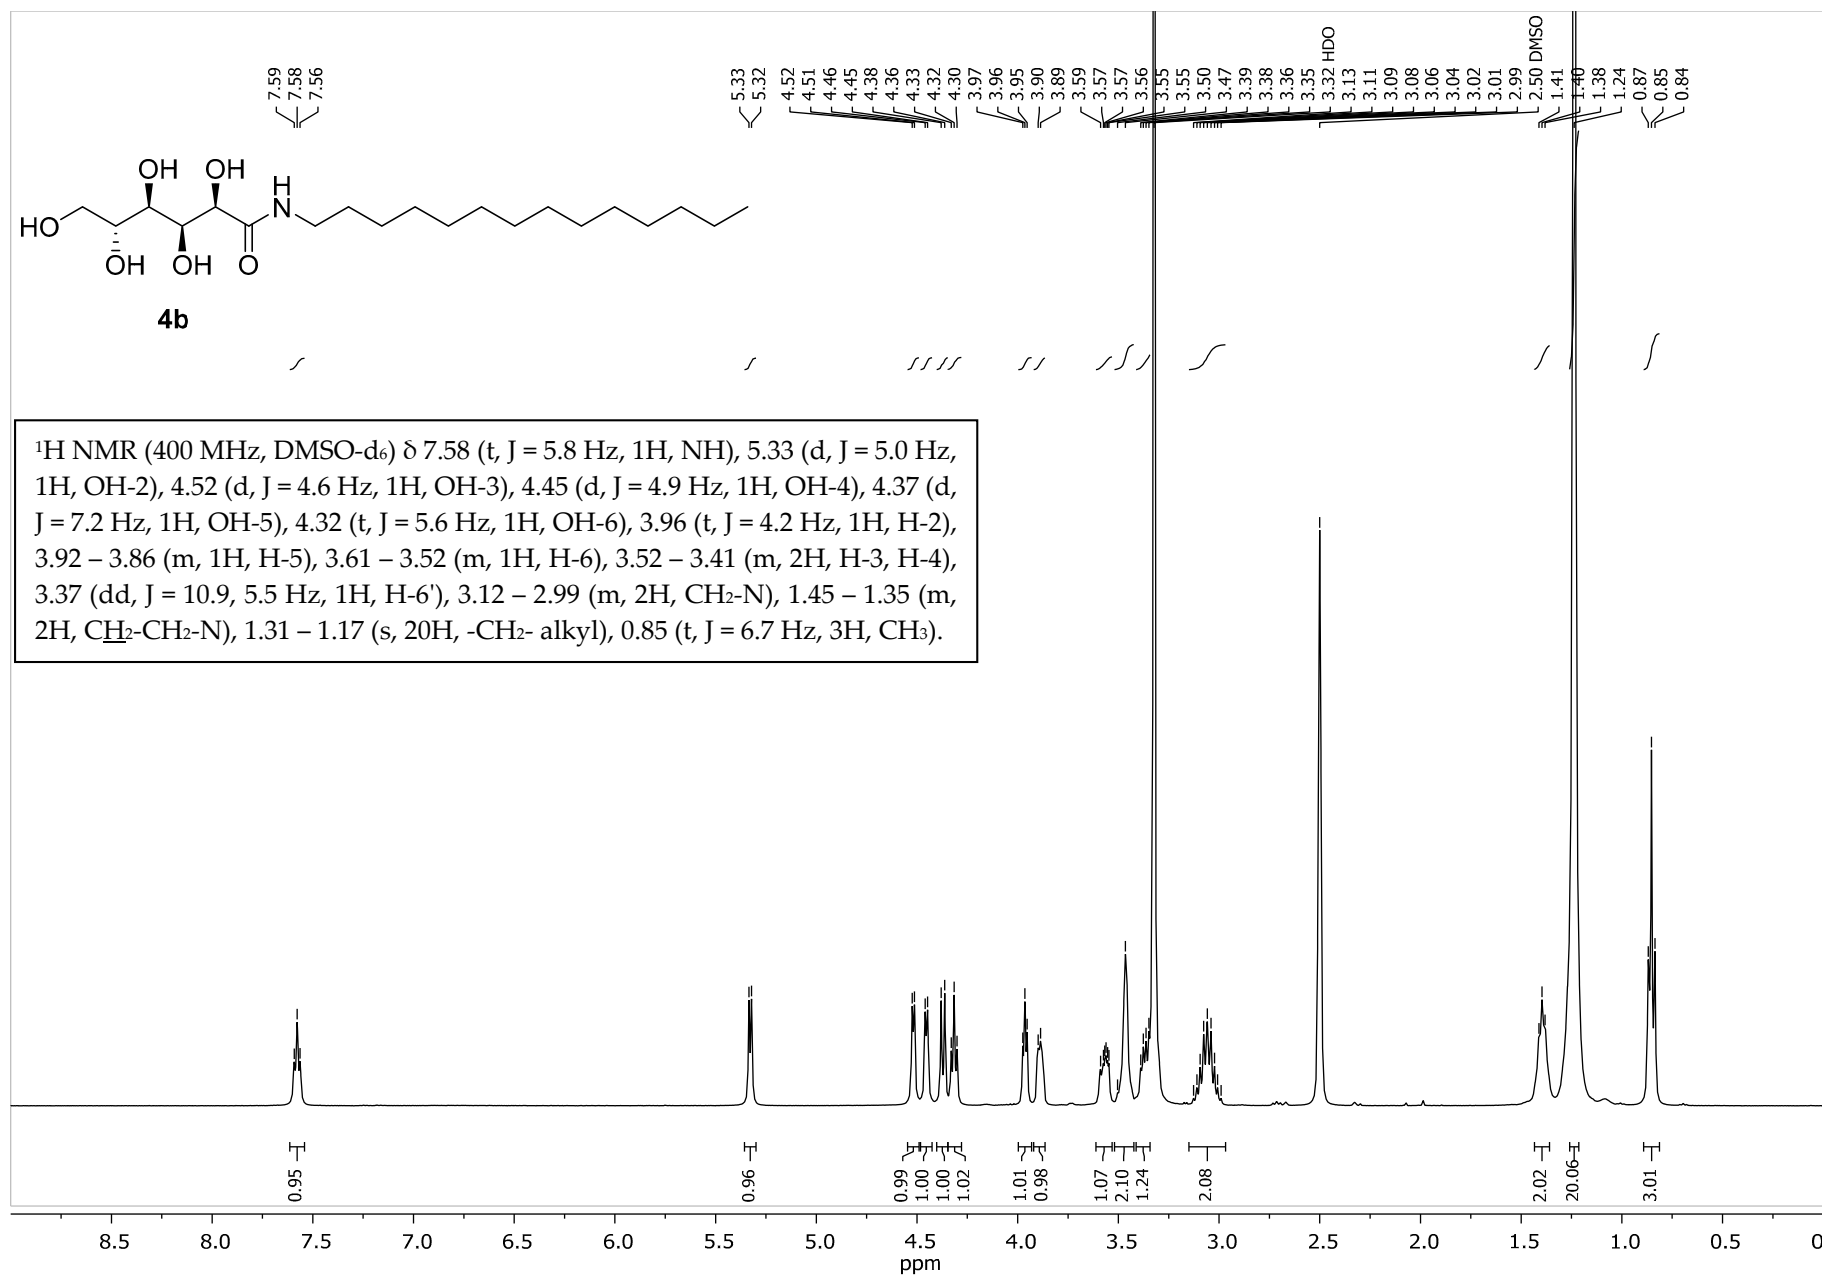



**Figure S8:  $^{13}\text{C}$  NMR spectrum of 4b crude**

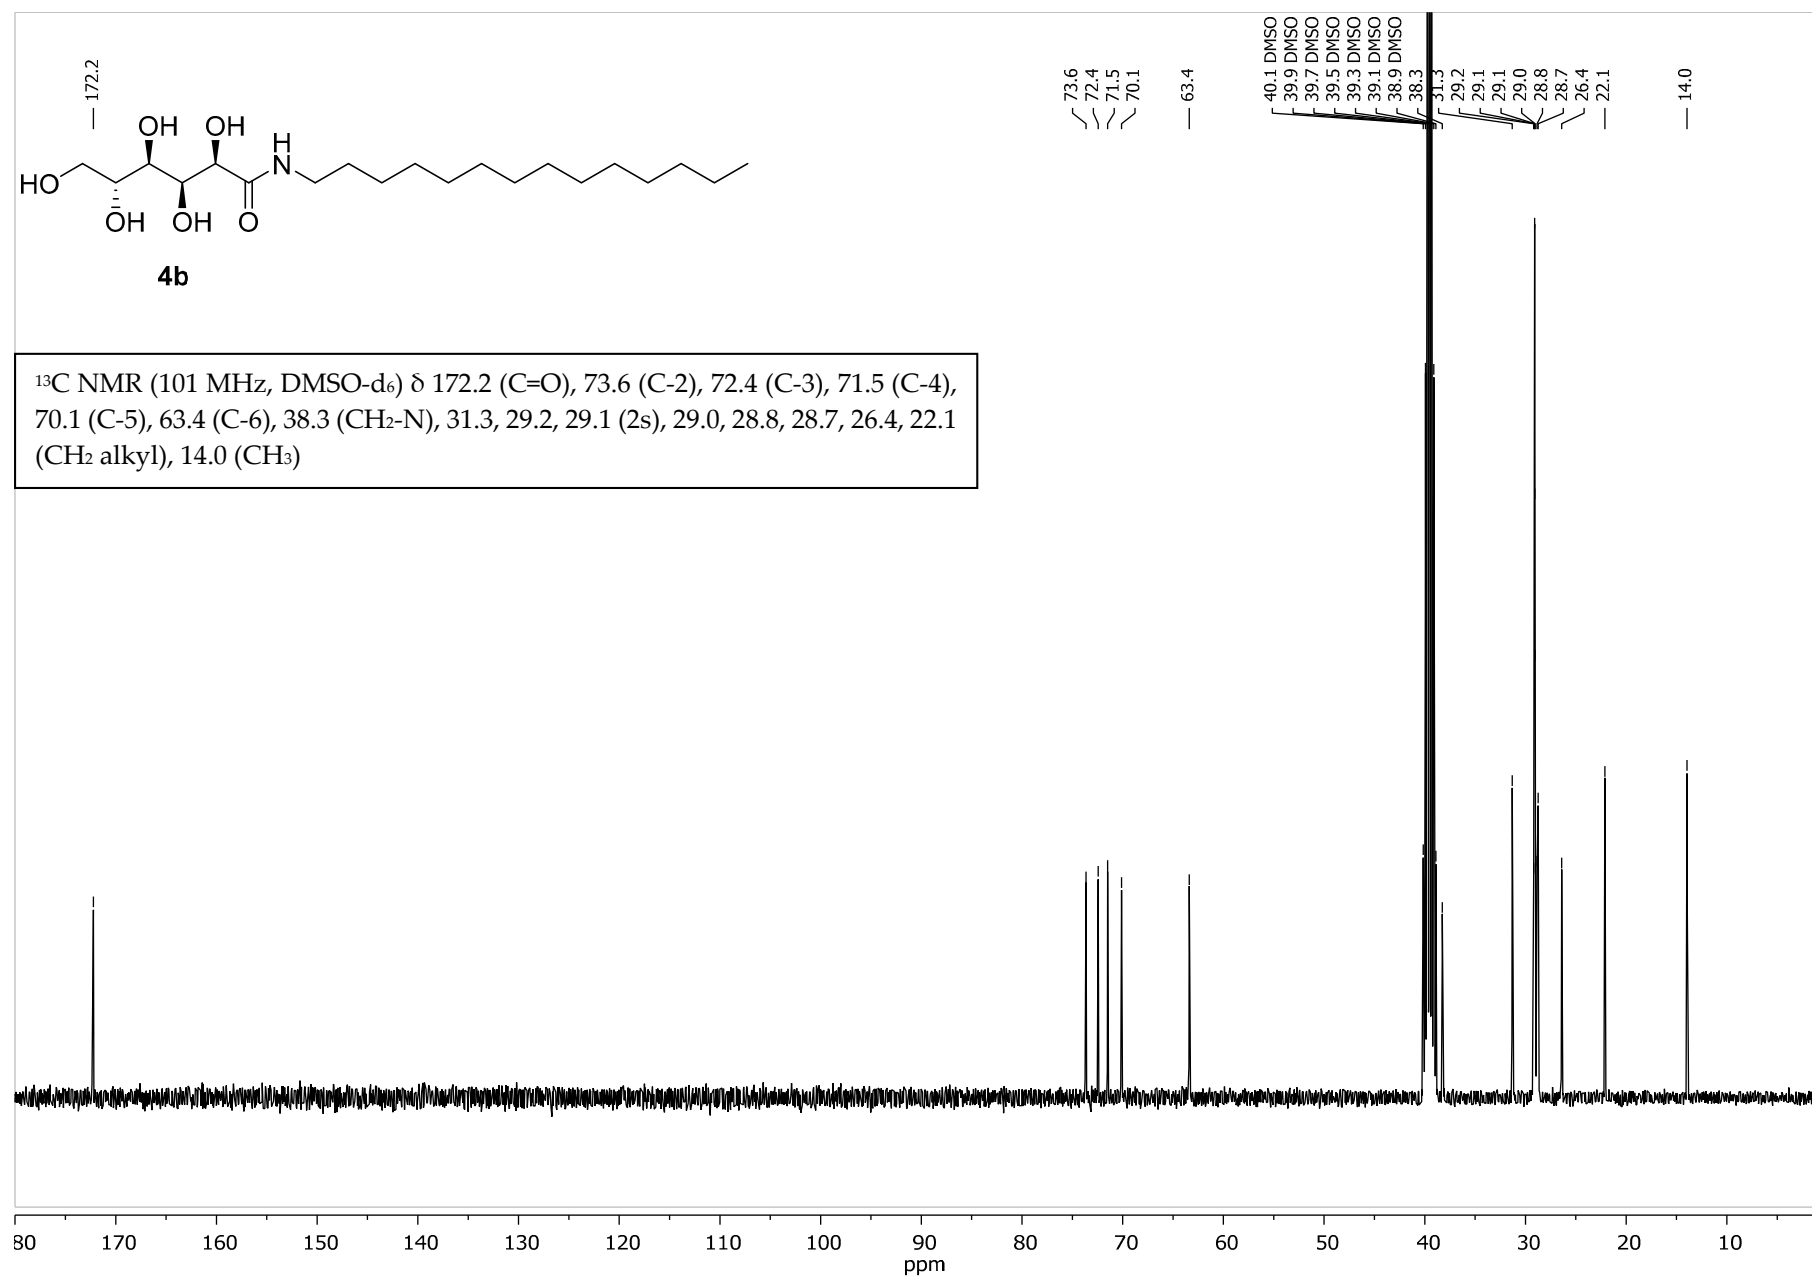

**Figure S9: COSY NMR 2D spectrum of 4b crude**

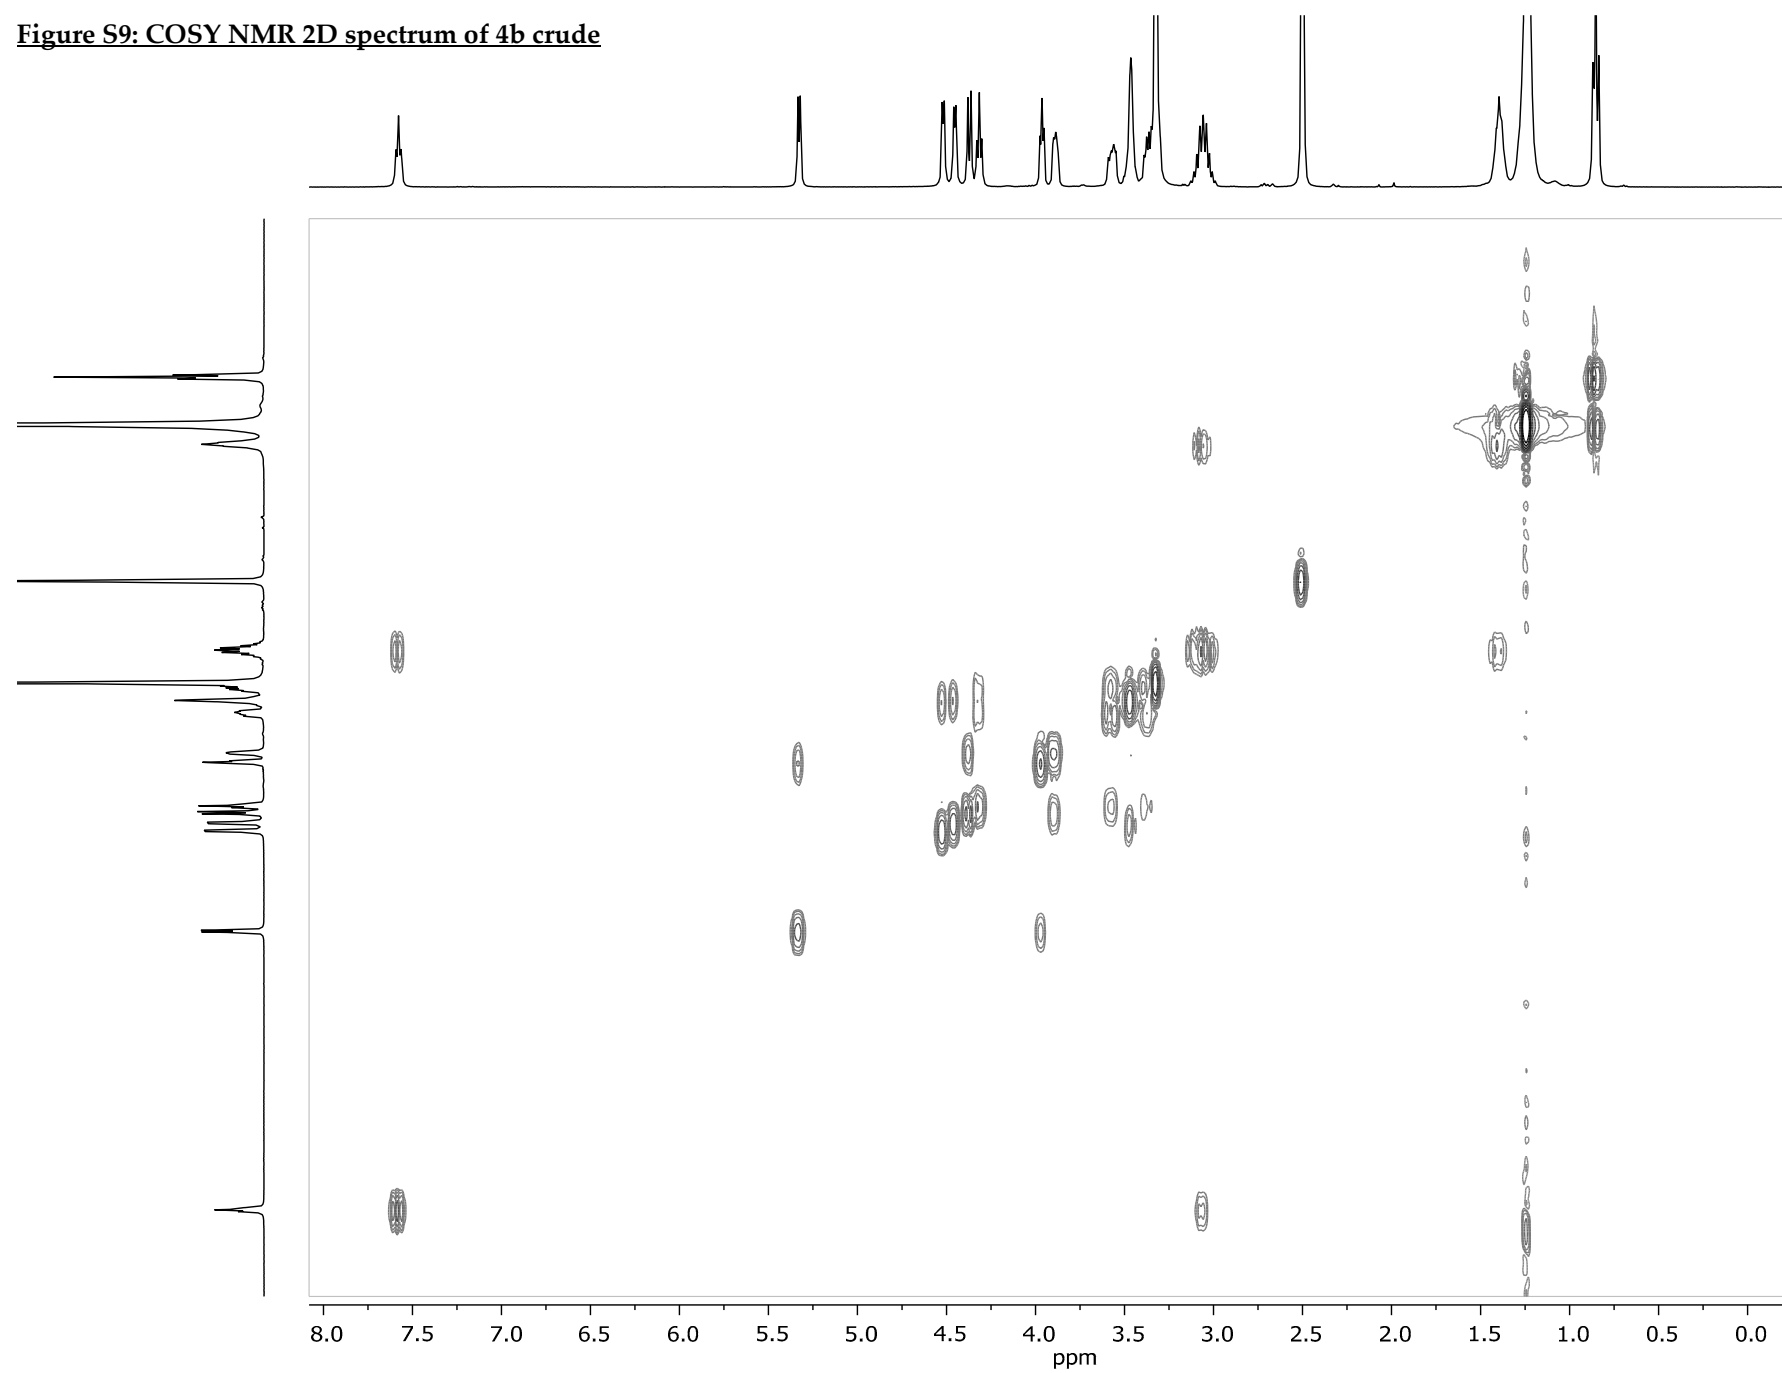

**Figure S10: HSQC  $^{13}\text{C}$ - $^1\text{H}$  NMR 2D spectrum of 4b crude**

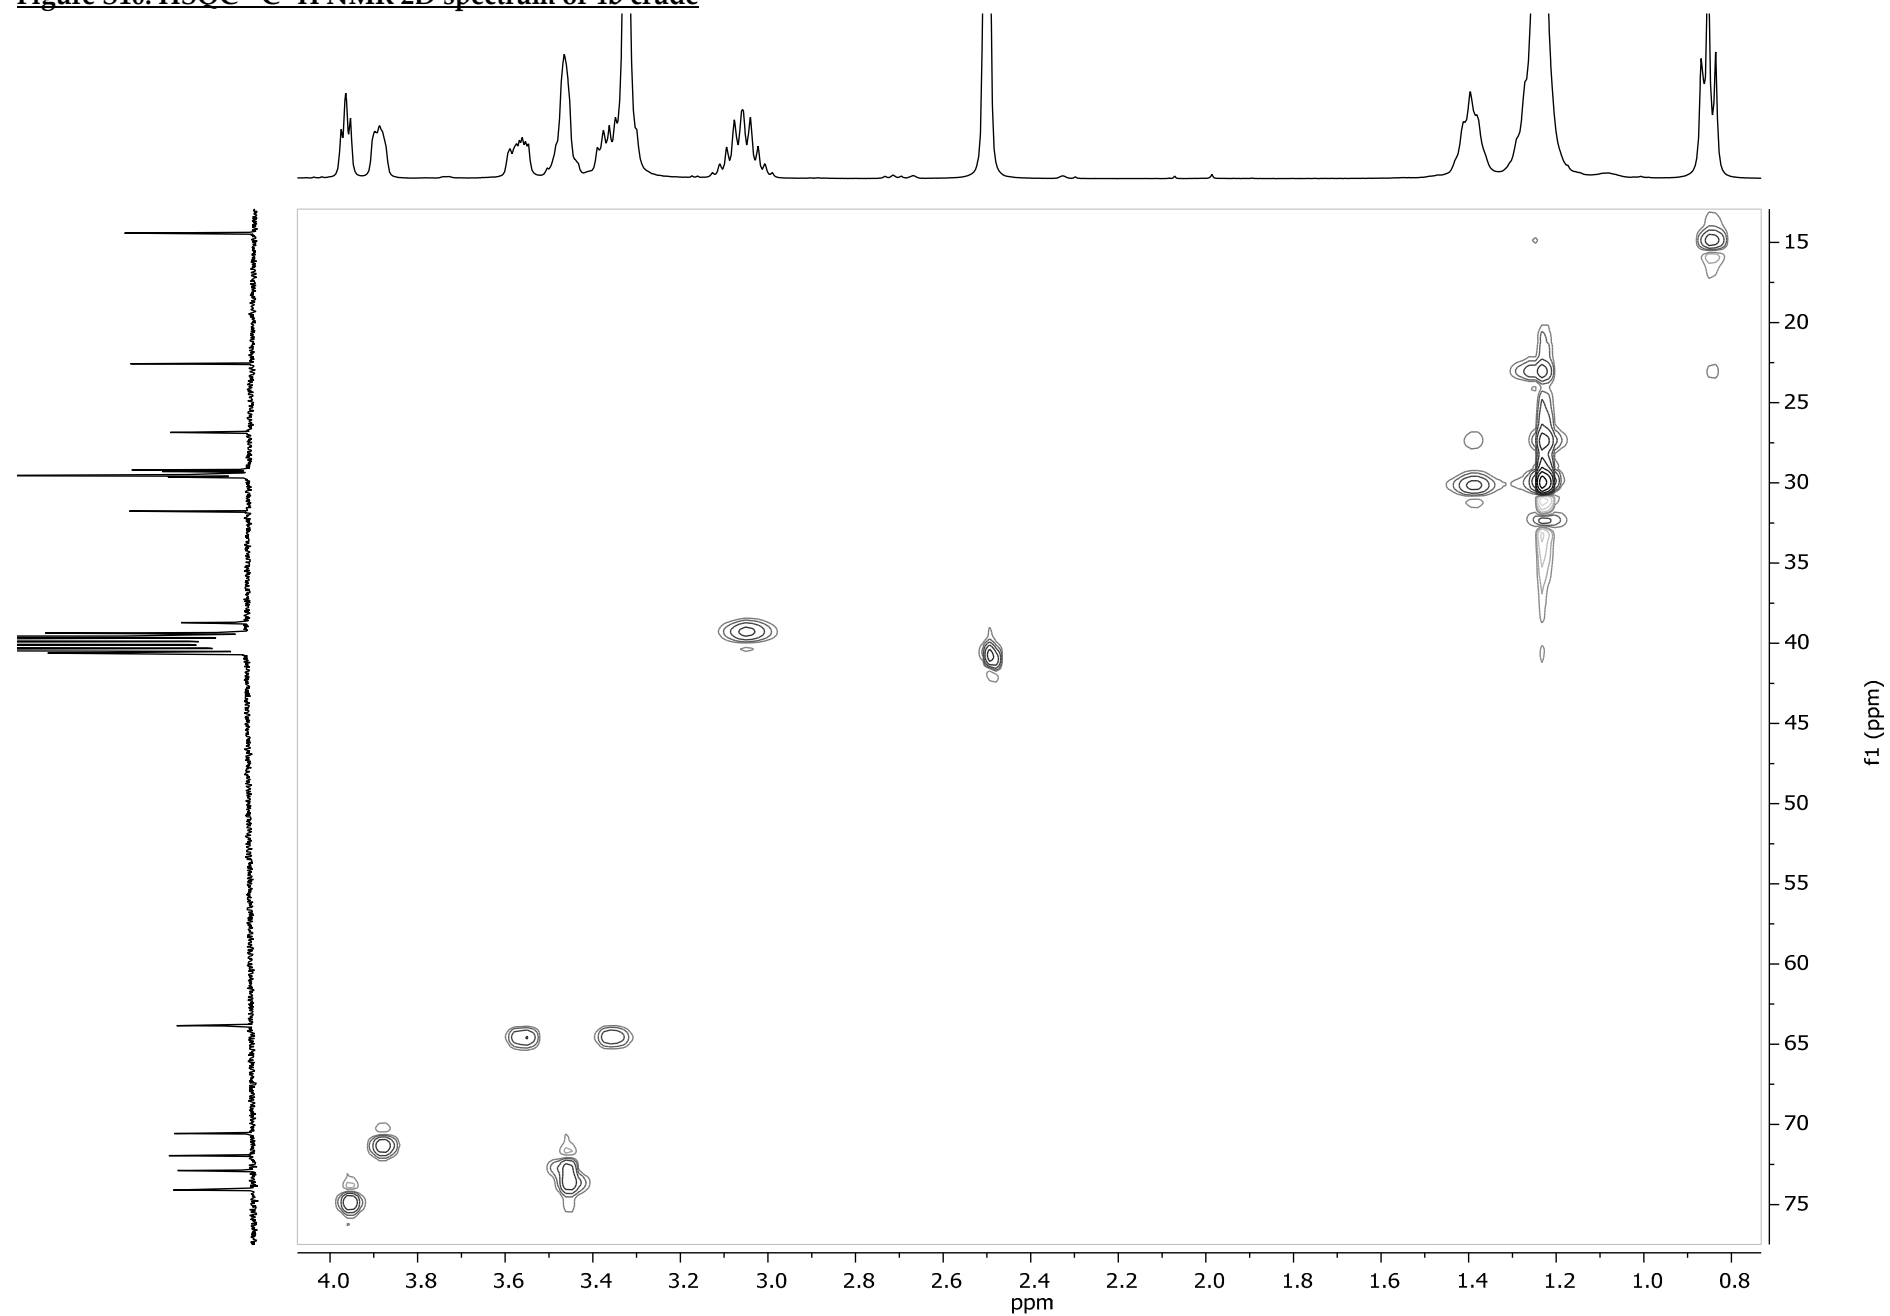

**Figure S11: HRMS analysis of 4b crude**

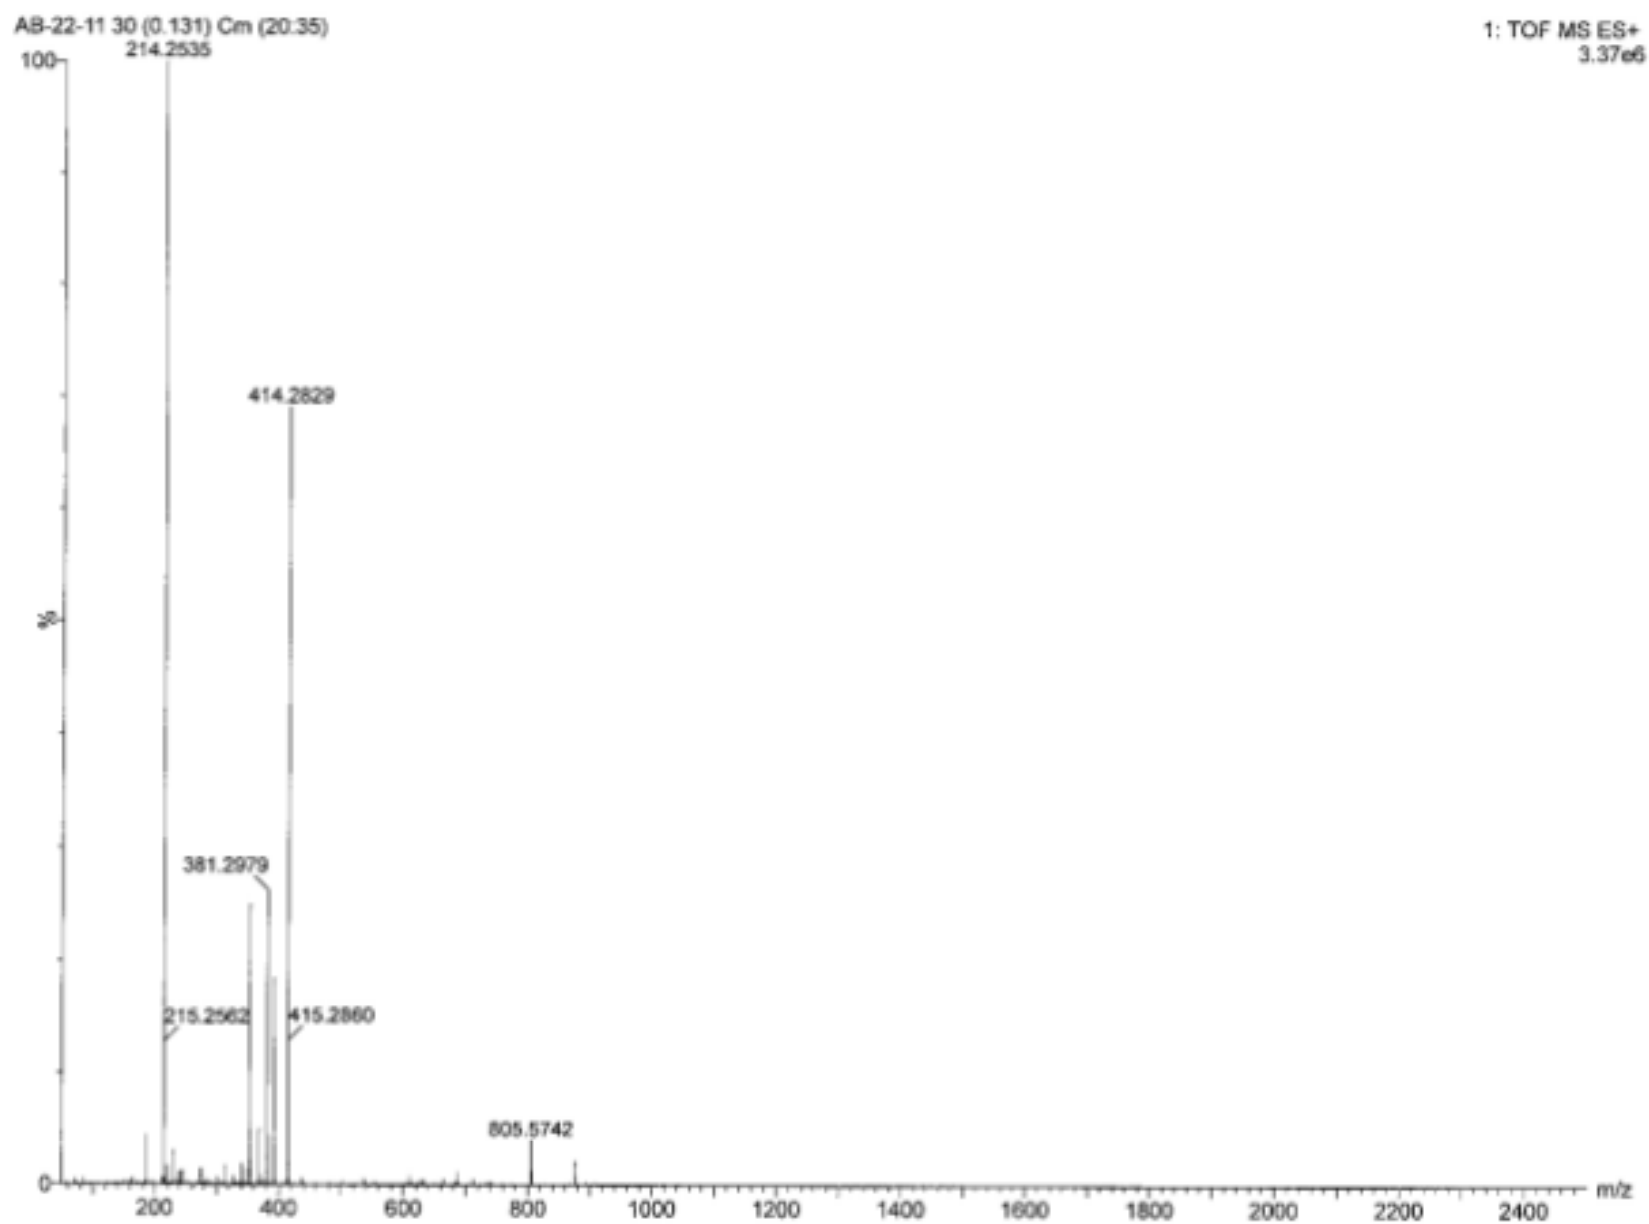

AB-22-11 (0.027) Is (1.00,1.00) C<sub>20</sub>H<sub>41</sub>NO<sub>6</sub>Na

1: TOF MS ES+  
7.88e12

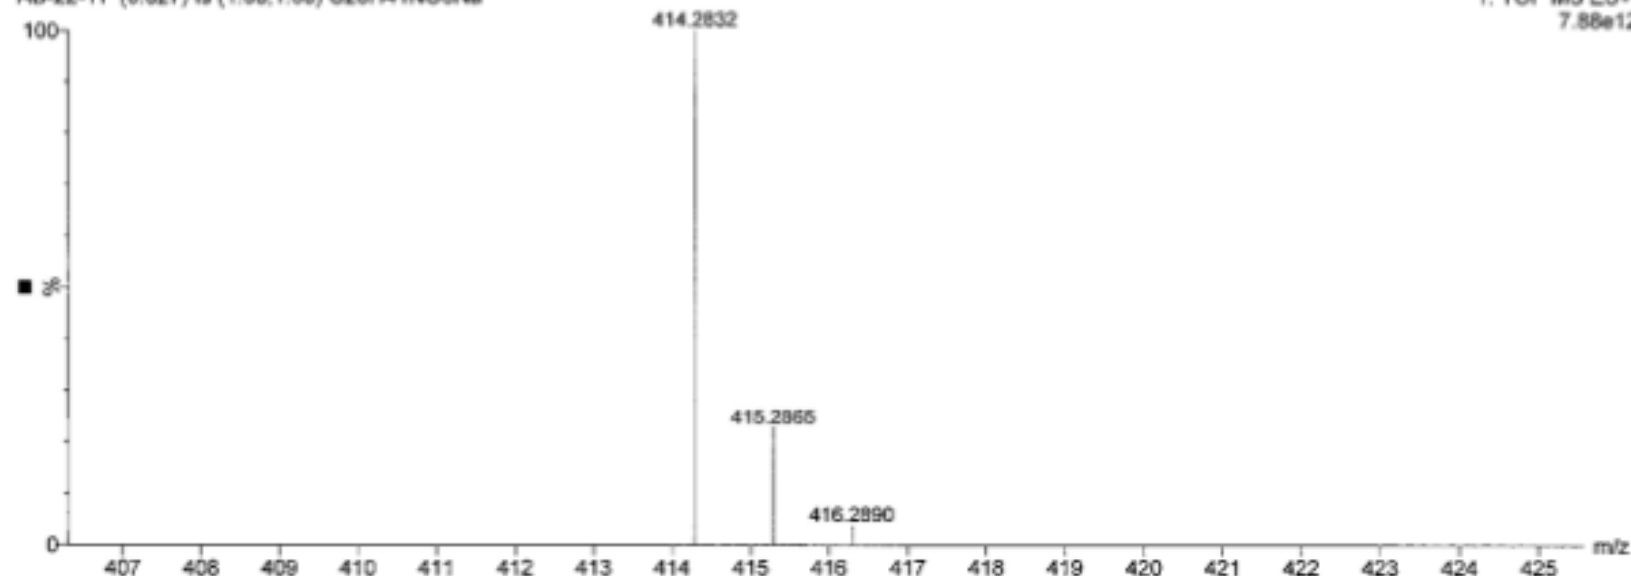

AB-22-11 30 (0.131) Cm (20:35)

1: TOF MS ES+  
2.33e6

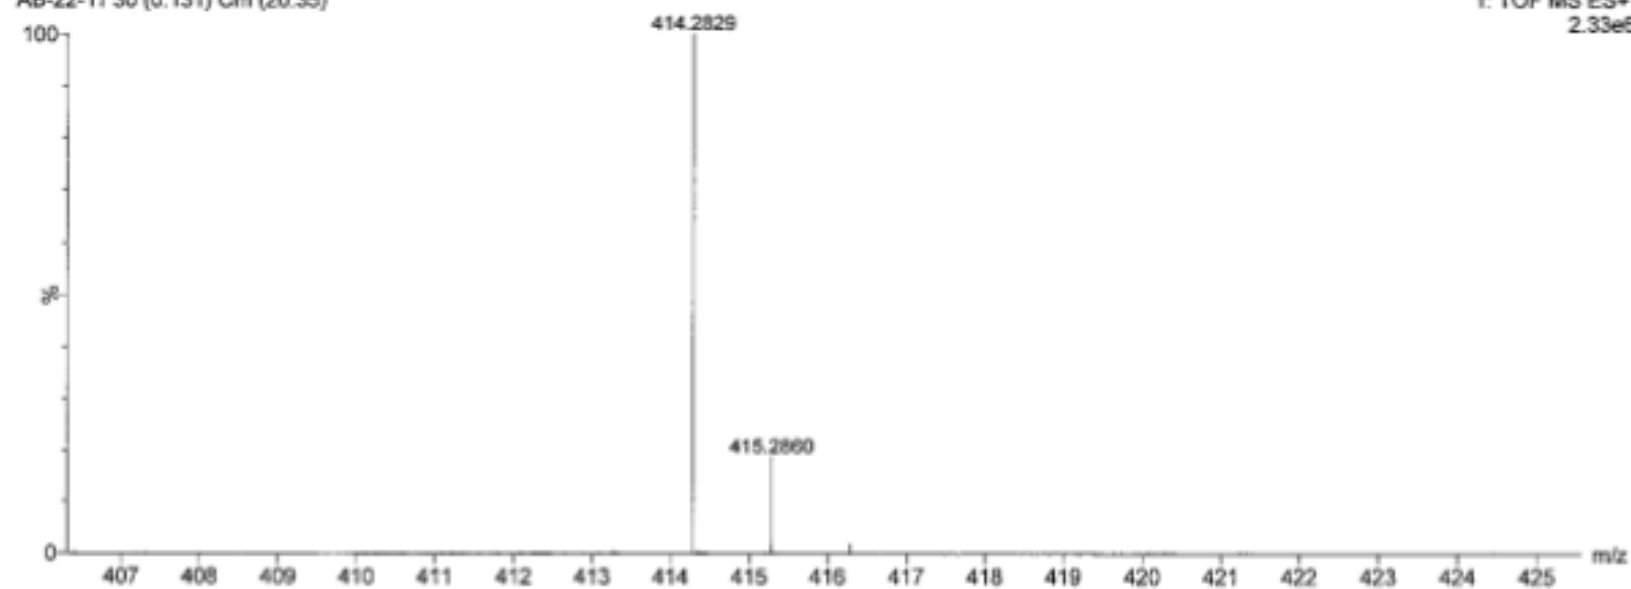

# Elemental Composition Report

Page 1

## Single Mass Analysis

Tolerance = 5.0 PPM / DBE: min = -5.0, max = 150.0

Element prediction: Off

Number of isotope peaks used for i-FIT = 3

Monoisotopic Mass, Even Electron Ions

1784 formula(e) evaluated with 4 results within limits (up to 50 closest results for each mass)

Elements Used:

C: 0-50 H: 0-100 N: 0-10 O: 0-50 Na: 0-1

AB-22-11 30 (0.131) Cm (20:35)

1: TOF MS ES+  
2.33e+006

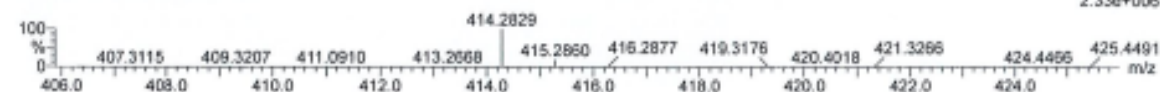

Minimum:

Maximum:

5.0 5.0 -5.0

150.0

| Mass     | Calc. Mass | mDa  | PPM  | DBE  | i-FIT  | Norm  | Conf (%) | Formula          |
|----------|------------|------|------|------|--------|-------|----------|------------------|
| 414.2829 | 414.2829   | 0.0  | 0.0  | 4.5  | 2260.6 | 0.390 | 67.73    | C18 H36 N7 O4    |
|          | 414.2832   | -0.3 | -0.7 | 0.5  | 2262.8 | 2.604 | 7.40     | C20 H41 N O6 Na  |
|          | 414.2815   | 1.4  | 3.4  | -0.5 | 2261.7 | 1.447 | 23.53    | C17 H40 N3 O8    |
|          | 414.2845   | -1.6 | -3.9 | 5.5  | 2264.5 | 4.307 | 1.35     | C21 H37 N5 O2 Na |

**Figure S12: IR analysis of 4b crude**

|                     |                      |                     |                                                              |                                            |
|---------------------|----------------------|---------------------|--------------------------------------------------------------|--------------------------------------------|
| <b>Title</b>        | AB-22-111            | <b>File Name</b>    | C:\PROGRAM FILES (X86)\LABSOLUTIONS\IR\DATA\ABED\AB-22-11.DX |                                            |
| <b>Date</b>         | 07 Jun 2022 16:38:00 | <b>Technique</b>    | Infrared                                                     | <b>Spectral Region</b> IR                  |
| <b>X Axis</b>       | Wavenumber (cm-1)    | <b>Y Axis</b>       | %Transmittance                                               | <b>Spectrum Range</b> 700.1603 - 4000.3641 |
| <b>Points Count</b> | 1712                 | <b>Data Spacing</b> | 1.9288                                                       |                                            |

AB-22-11.dx

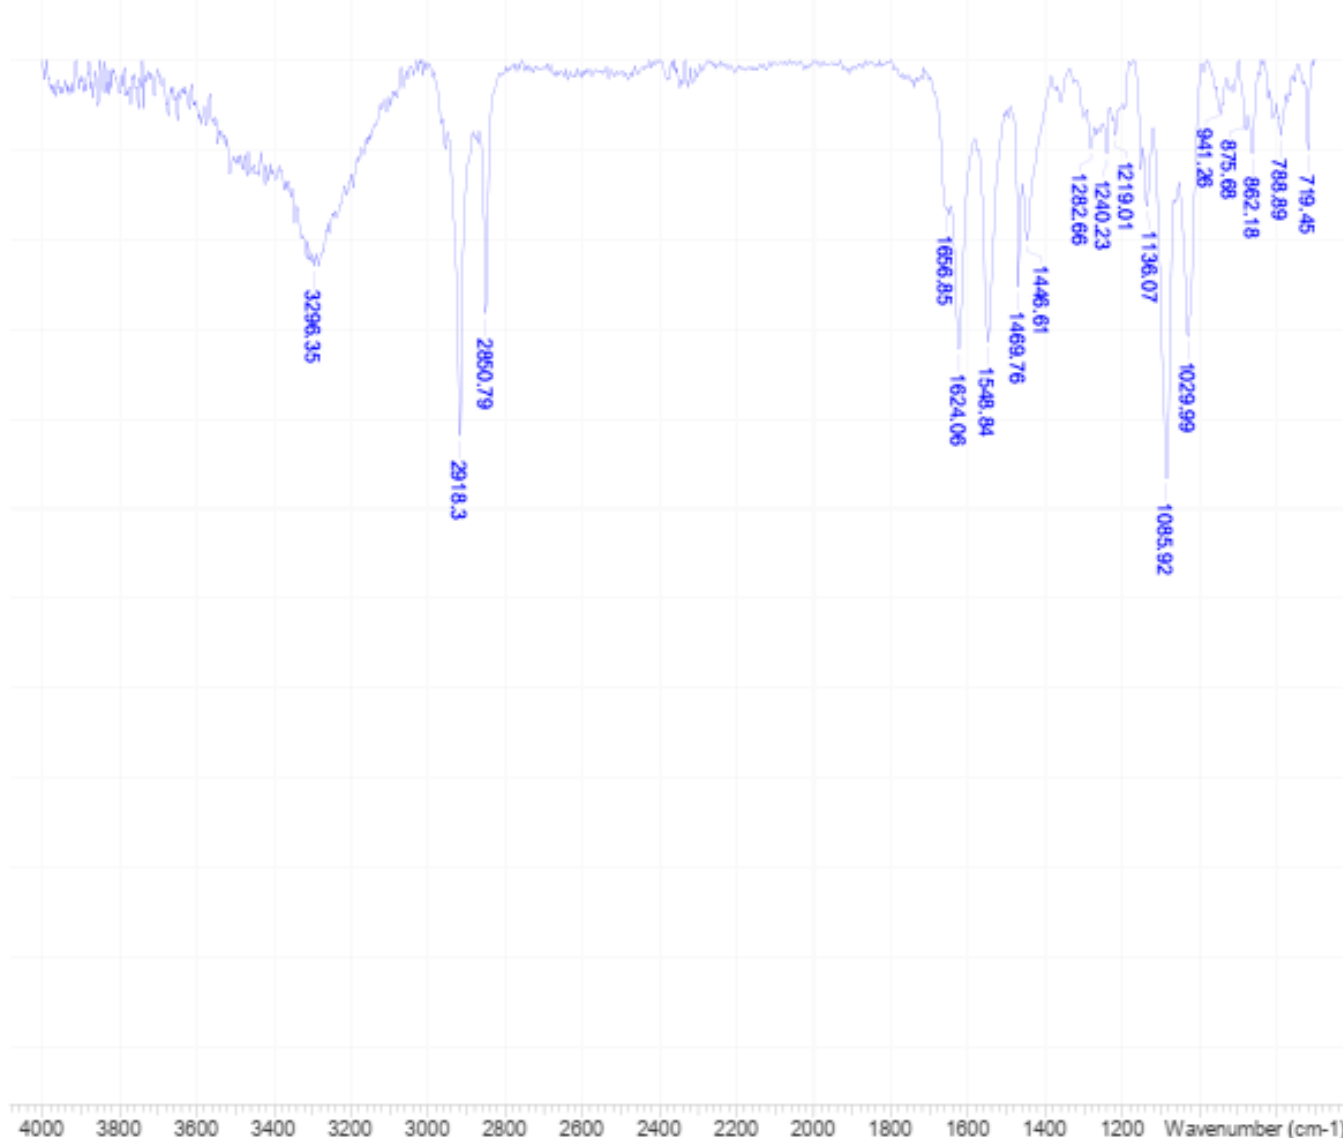

| No | cm-1    | %T     | FWHH | Asym | Intensity | No | cm-1    | %T     | FWHH  | Asym | Intensity |
|----|---------|--------|------|------|-----------|----|---------|--------|-------|------|-----------|
| 1  | 719.45  | 98.003 | -    | -    | W         | 11 | 1282.66 | 98.033 | -     | -    | W         |
| 2  | 788.89  | 98.328 | -    | -    | W         | 12 | 1446.61 | 95.985 | -     | -    | M         |
| 3  | 862.18  | 97.920 | -    | -    | W         | 13 | 1489.76 | 94.946 | -     | -    | M         |
| 4  | 875.68  | 98.772 | -    | -    | W         | 14 | 1548.84 | 93.716 | -     | -    | S         |
| 5  | 941.26  | 99.033 | -    | -    | W         | 15 | 1624.06 | 93.557 | -     | -    | S         |
| 6  | 1029.99 | 93.841 | -    | -    | S         | 16 | 1656.85 | 96.671 | -     | -    | M         |
| 7  | 1085.92 | 90.675 | -    | -    | VS        | 17 | 2850.79 | 94.353 | -     | -    | S         |
| 8  | 1136.07 | 96.743 | -    | -    | M         | 18 | 2918.30 | 91.629 | -1.00 | 0.00 | S         |
| 9  | 1219.01 | 98.324 | -    | -    | W         | 19 | 3296.35 | 95.410 | -     | -    | M         |
| 10 | 1240.23 | 97.915 | -    | -    | W         |    |         |        |       |      |           |

**Figure S13:  $^1\text{H}$  NMR spectrum of 4c crude**

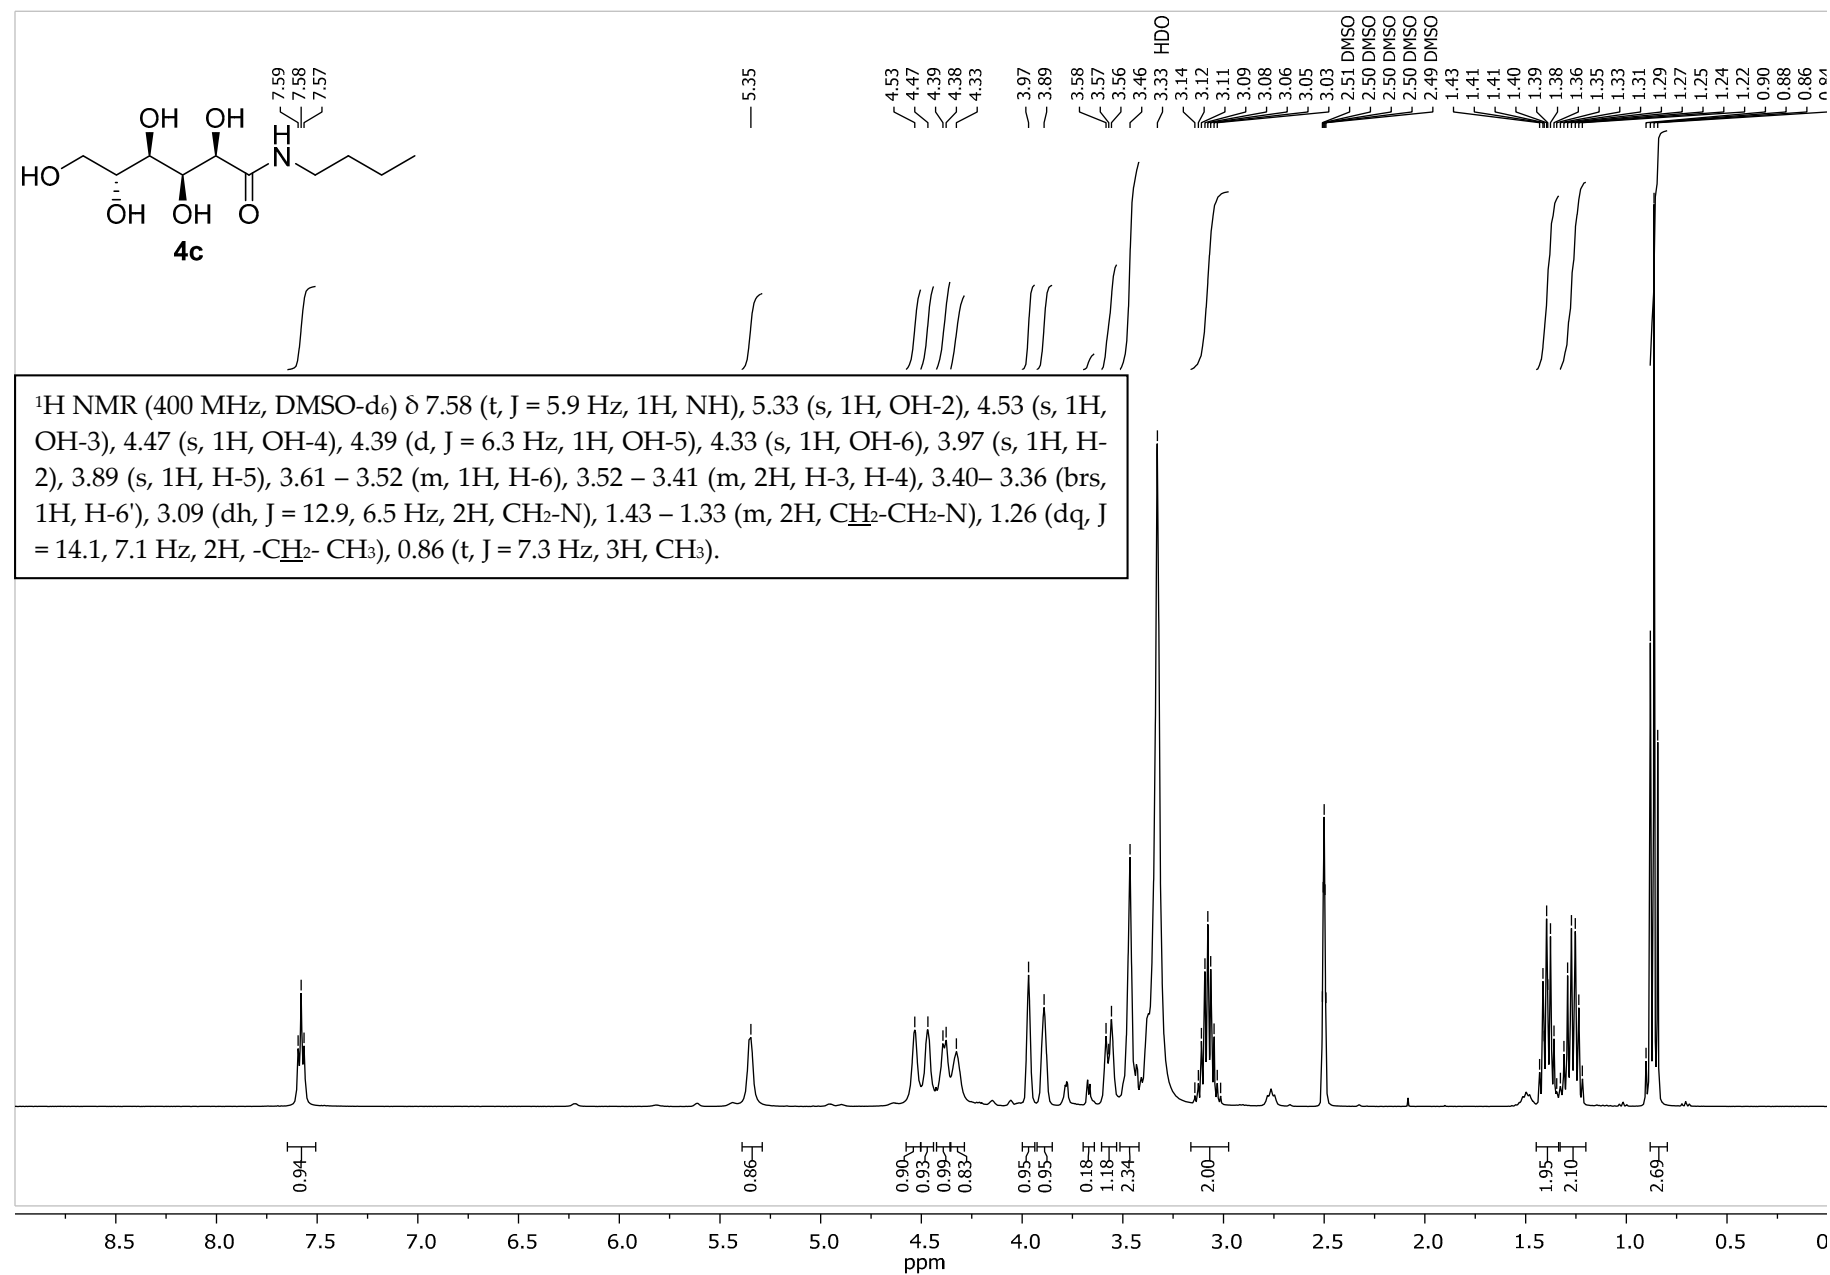



**Figure S14:  $^{13}\text{C}$  spectrum of 4c crude**

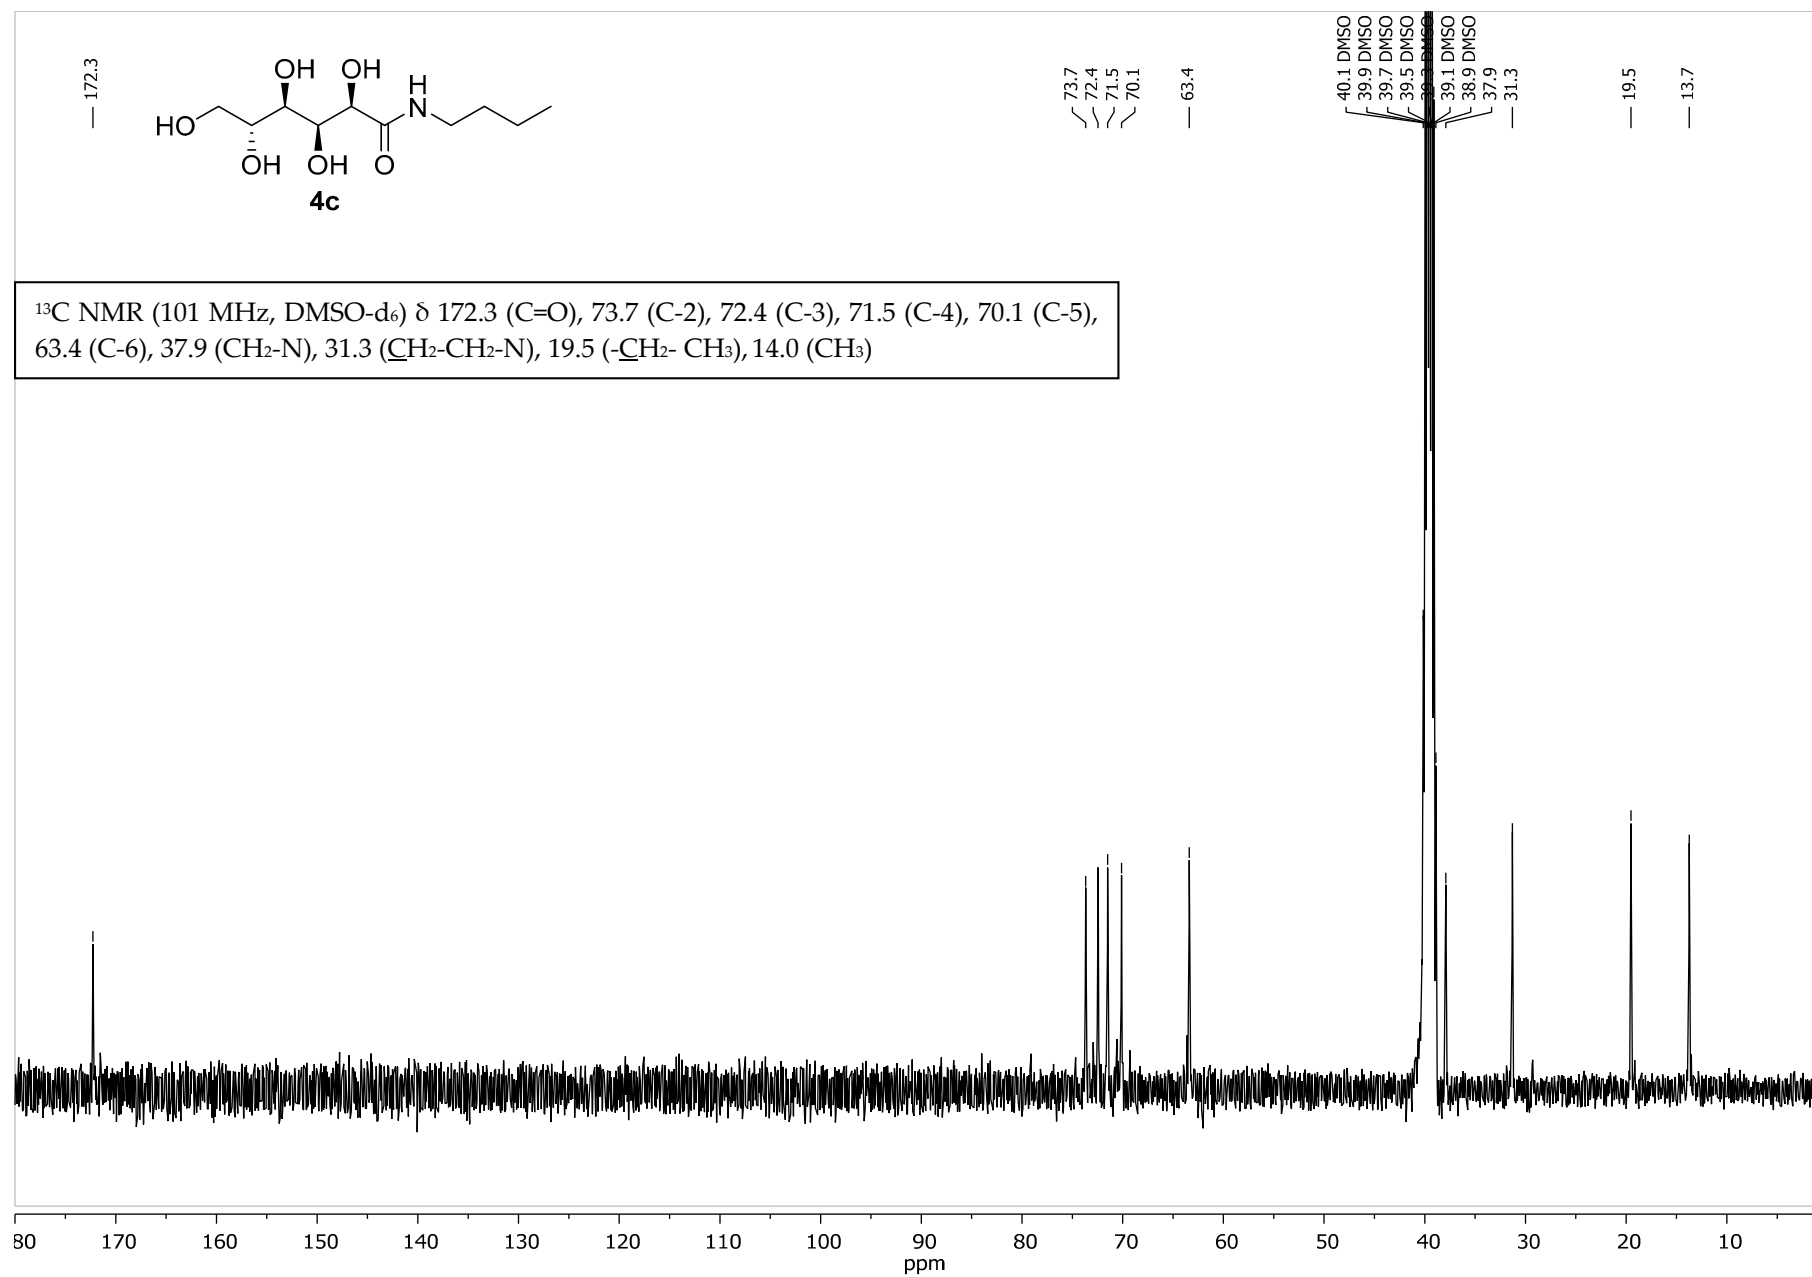

**Figure S15: <sup>1</sup>H NMR spectrum of 4d crude**

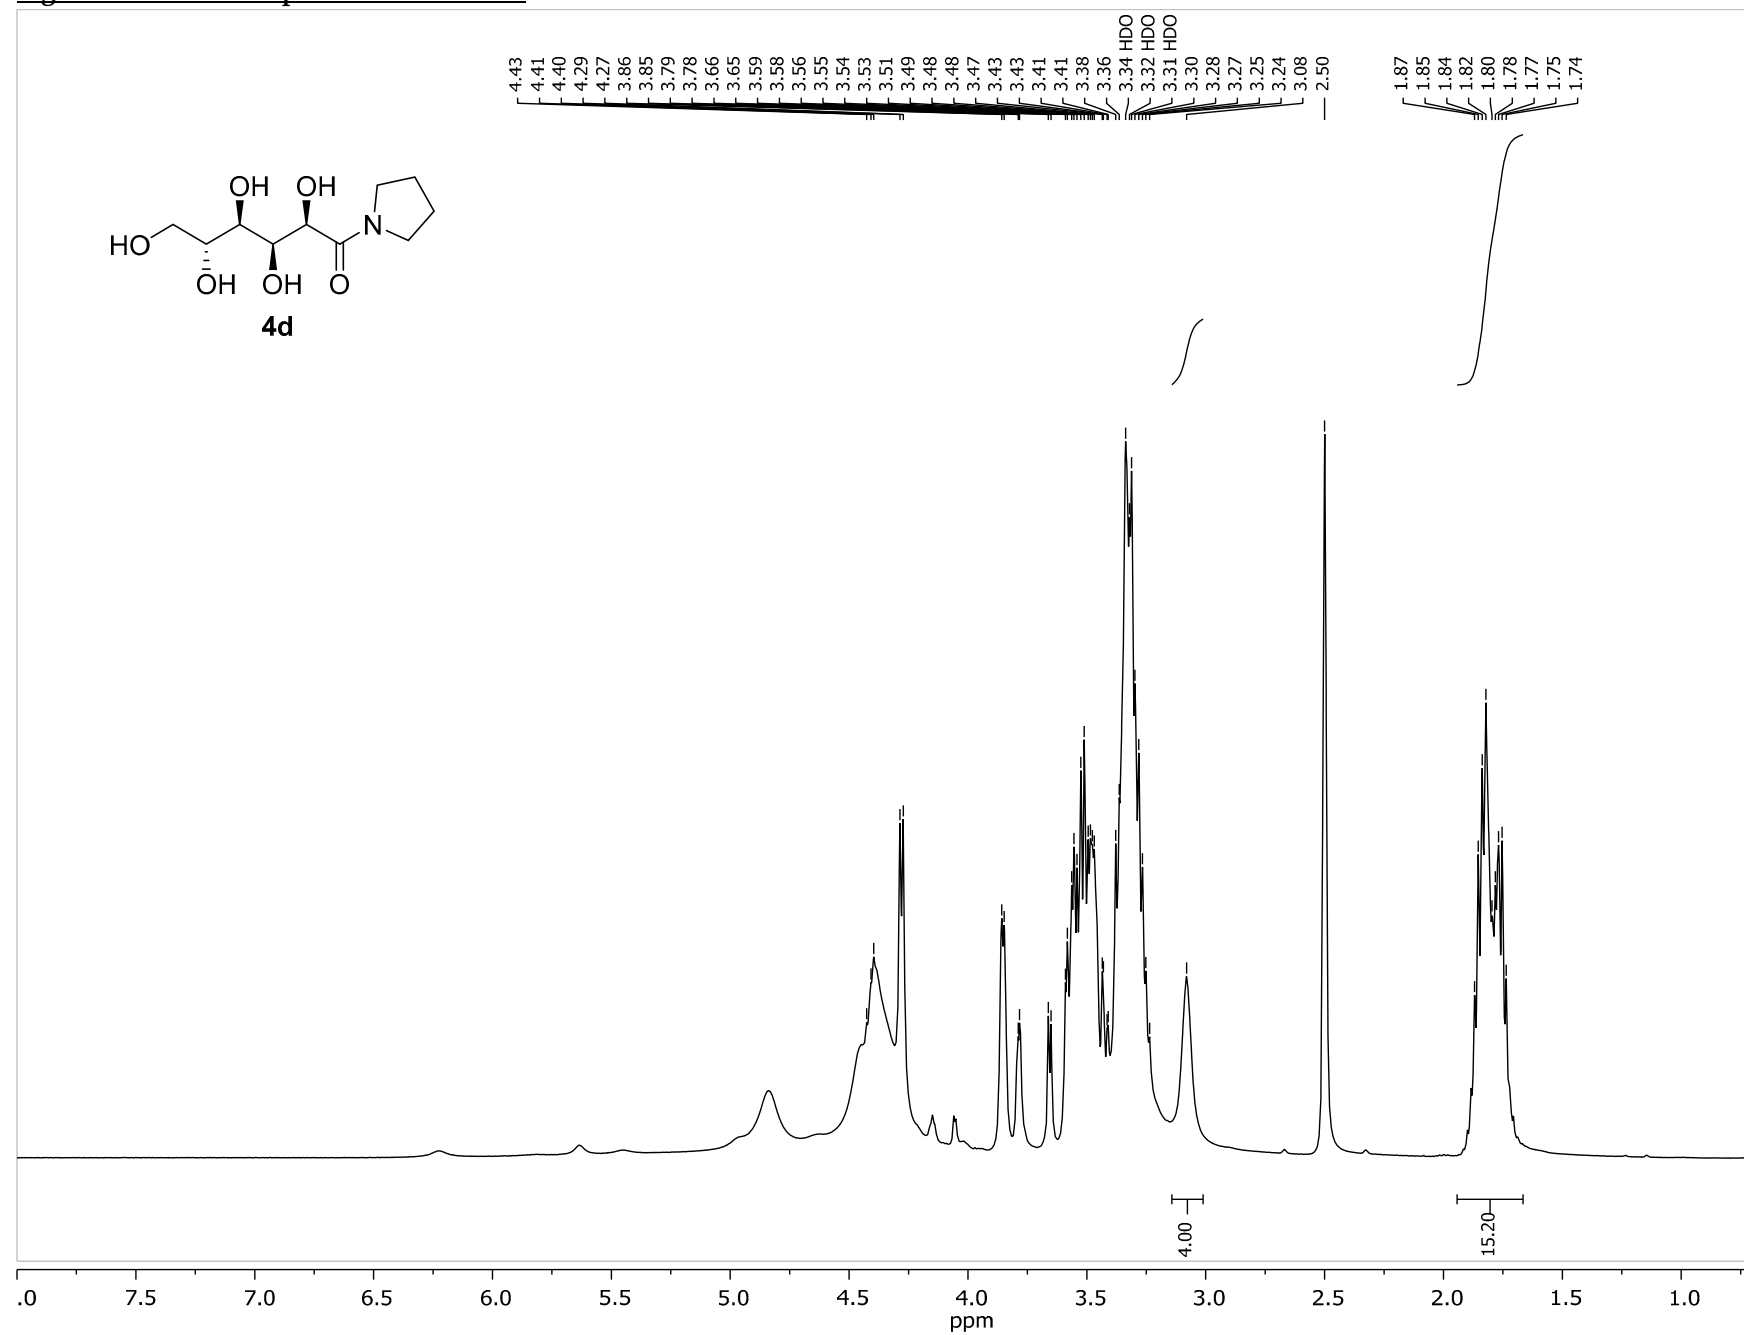

**Figure S16:  $^{13}\text{C}$  NMR spectrum of 4d crude**

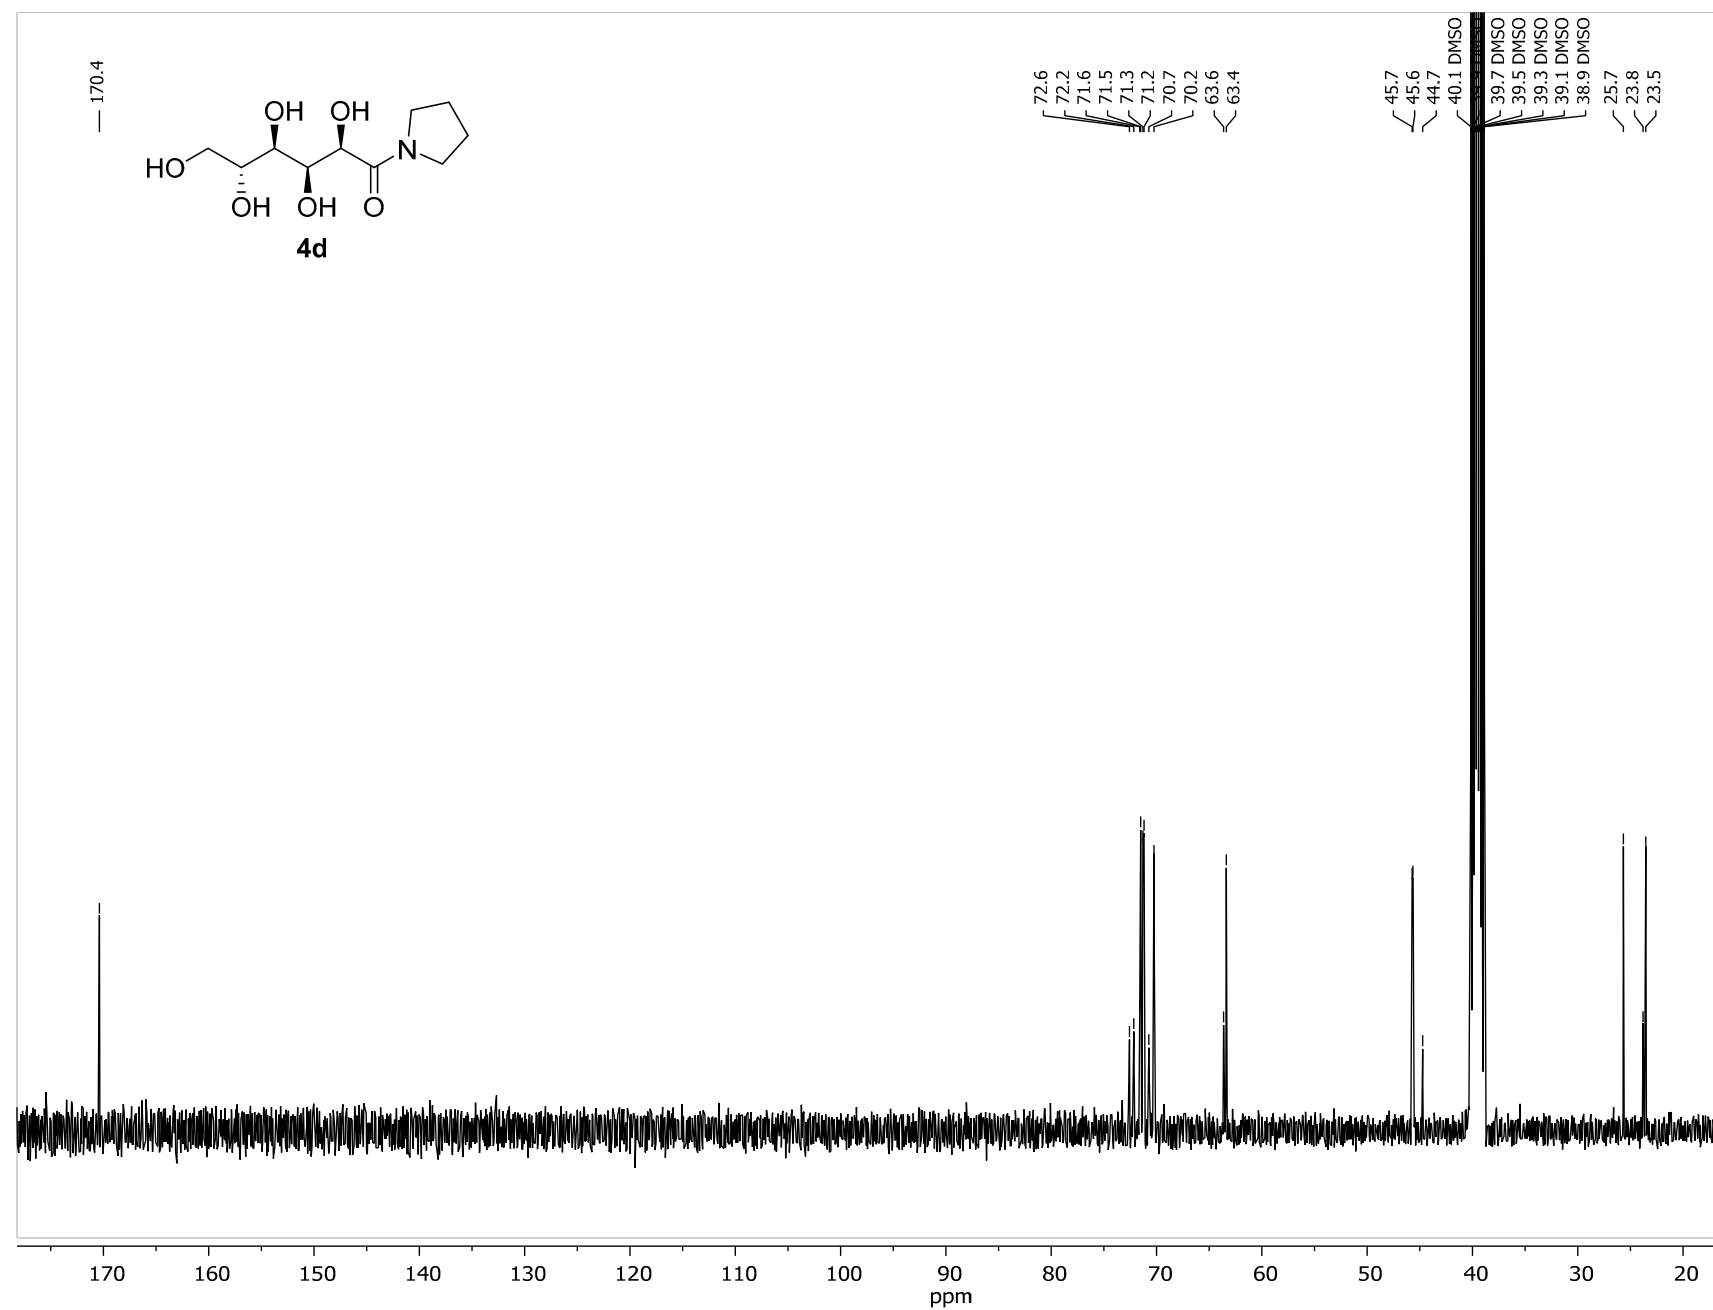

**Figure S17:  $^1\text{H}$  NMR spectrum of 4e crude**

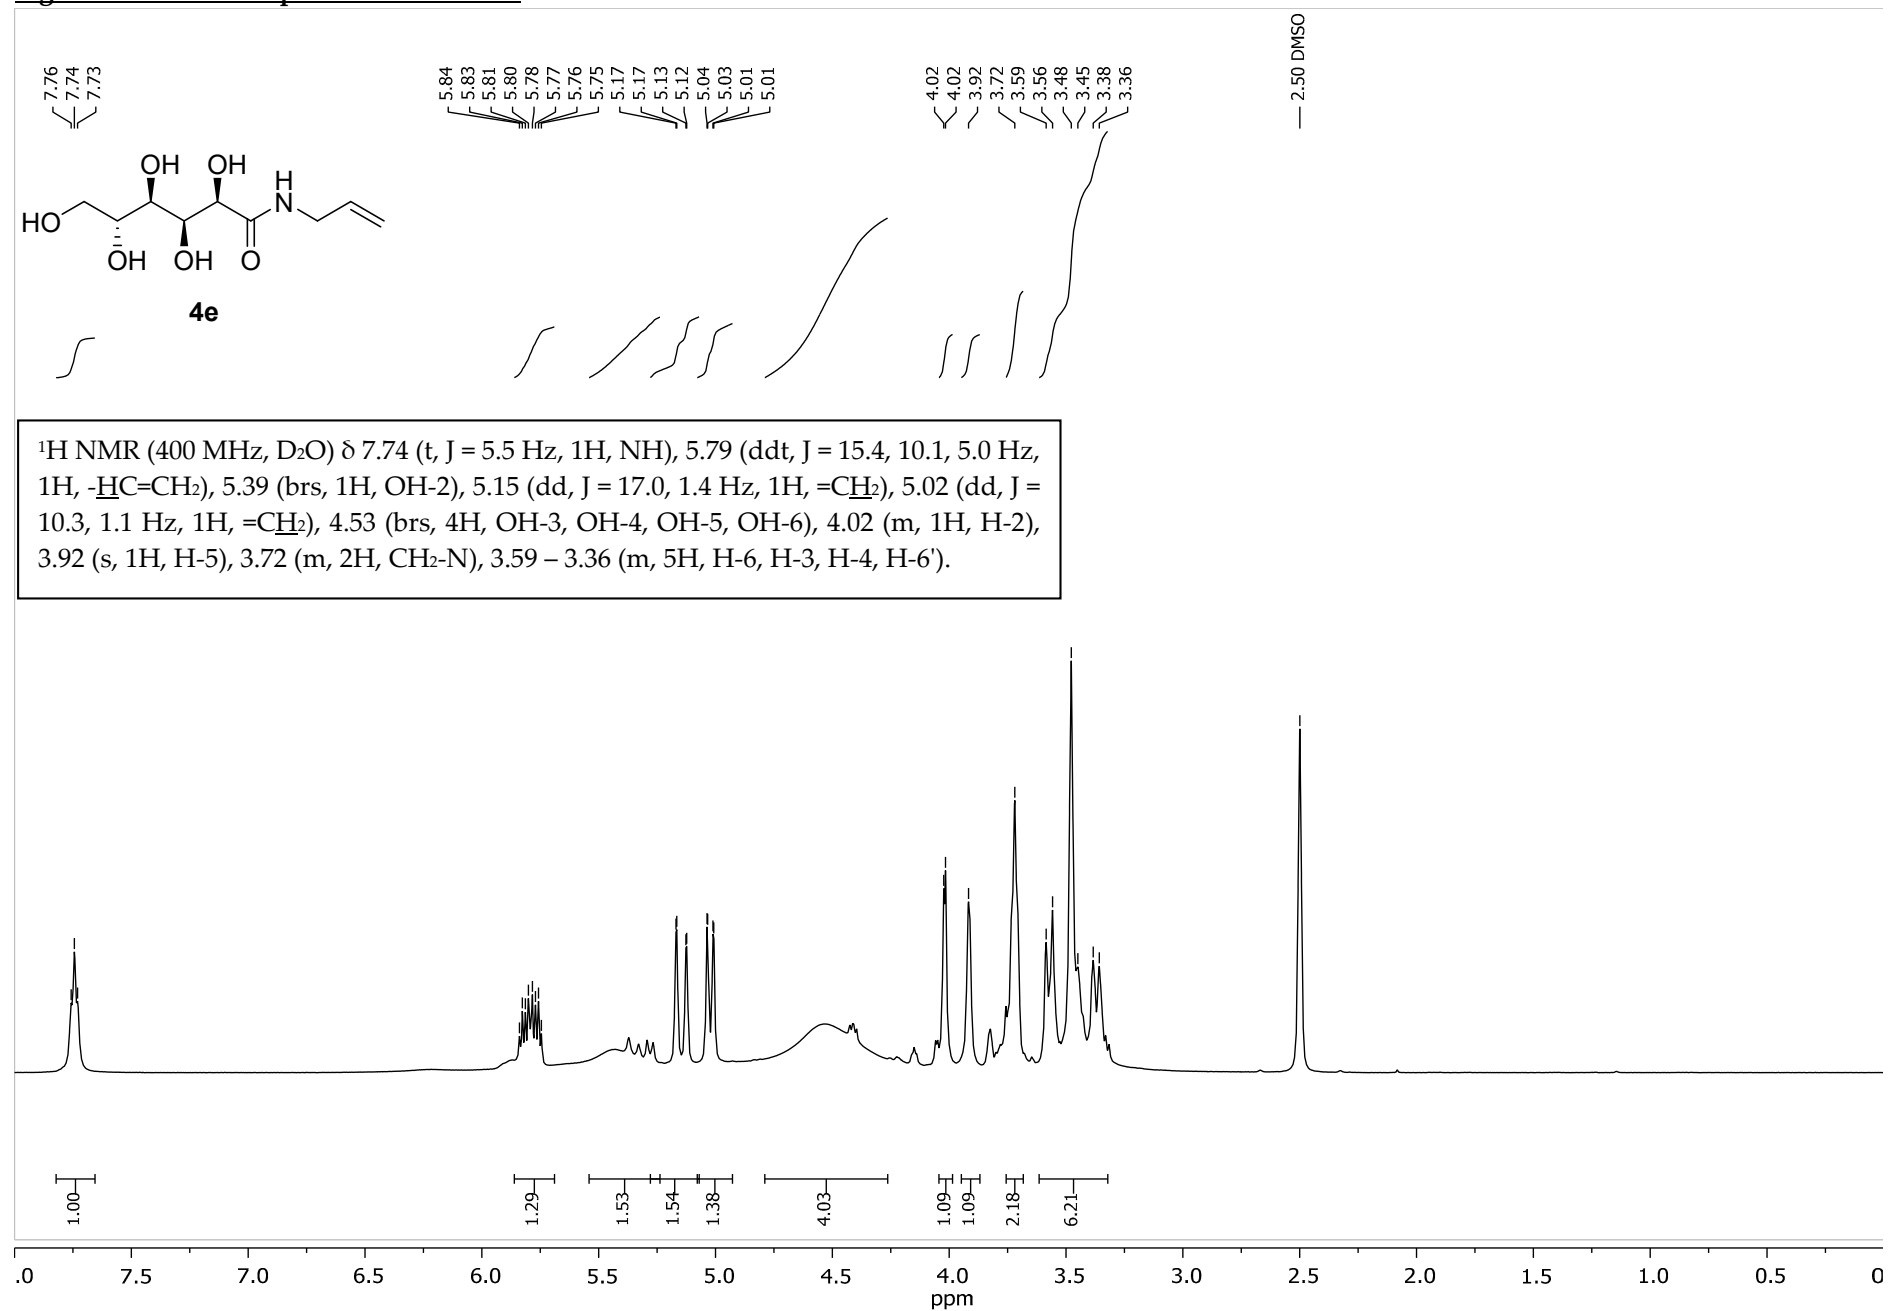

**Figure S18:**  $^{13}\text{C}$  NMR spectrum of **4e** crude

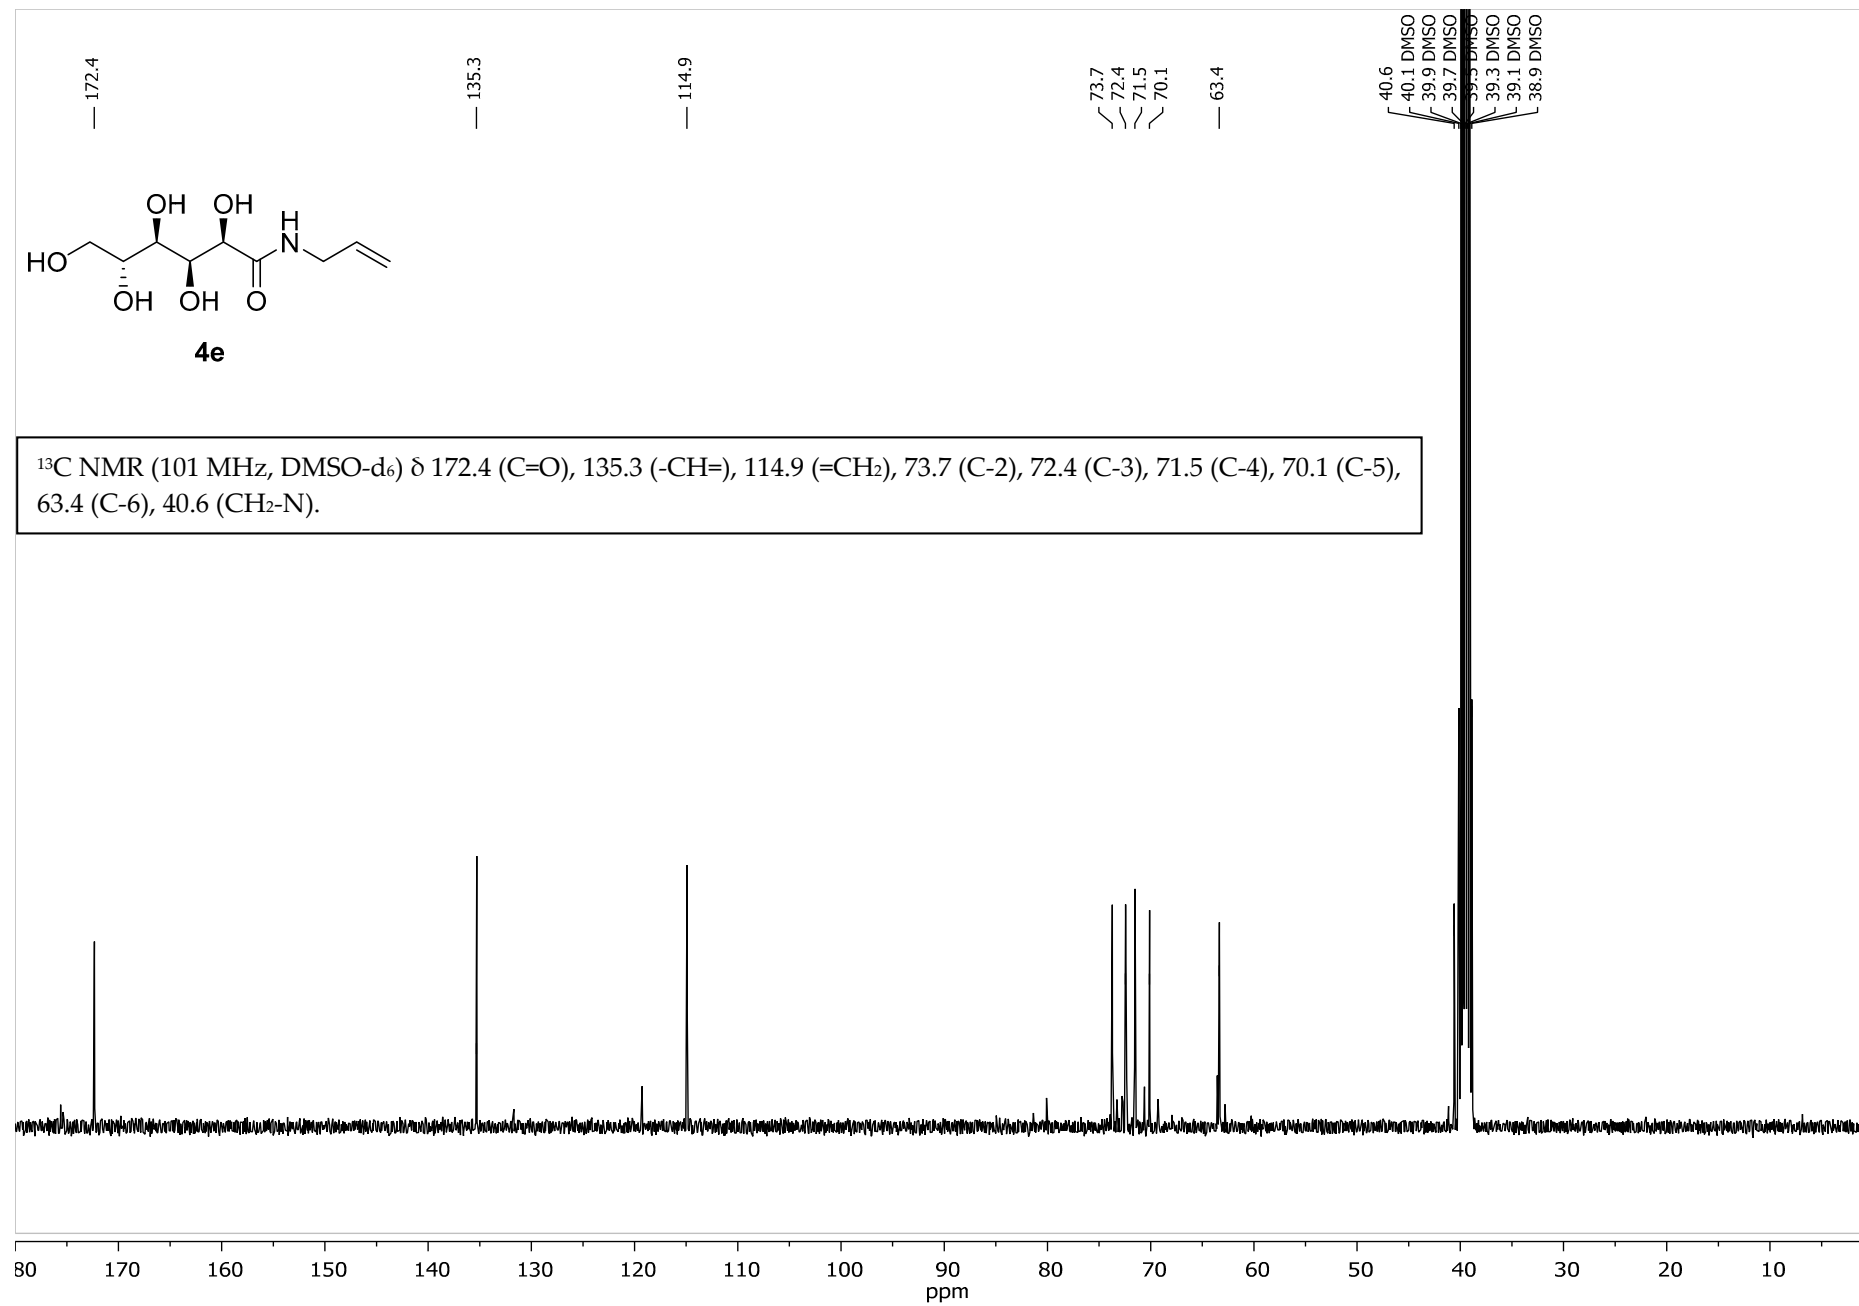

**Figure S19:  $^1\text{H}$  NMR spectrum of 4f crude**

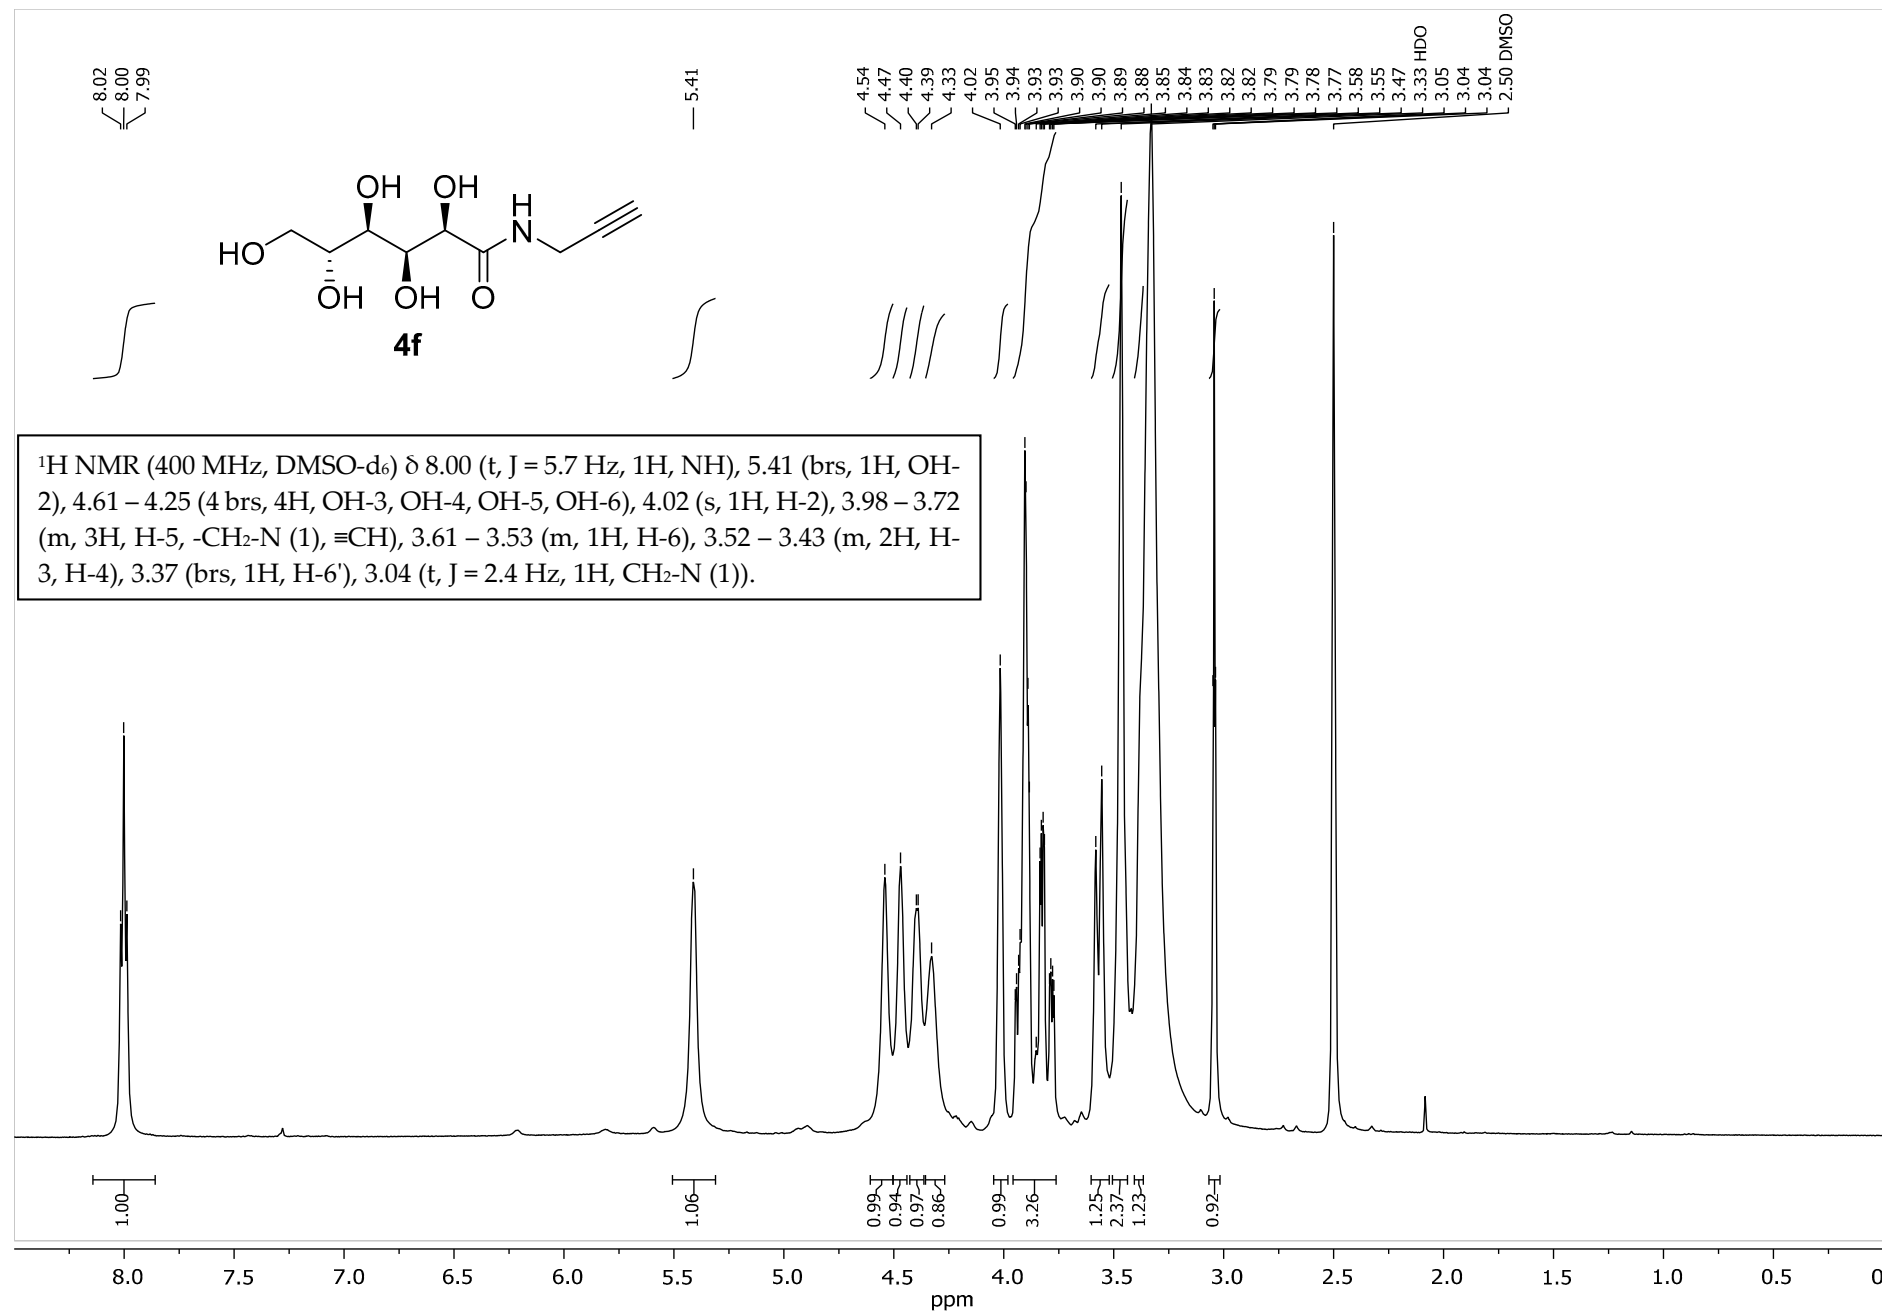

**Figure S20:  $^{13}\text{C}$  NMR spectrum of 4f crude**

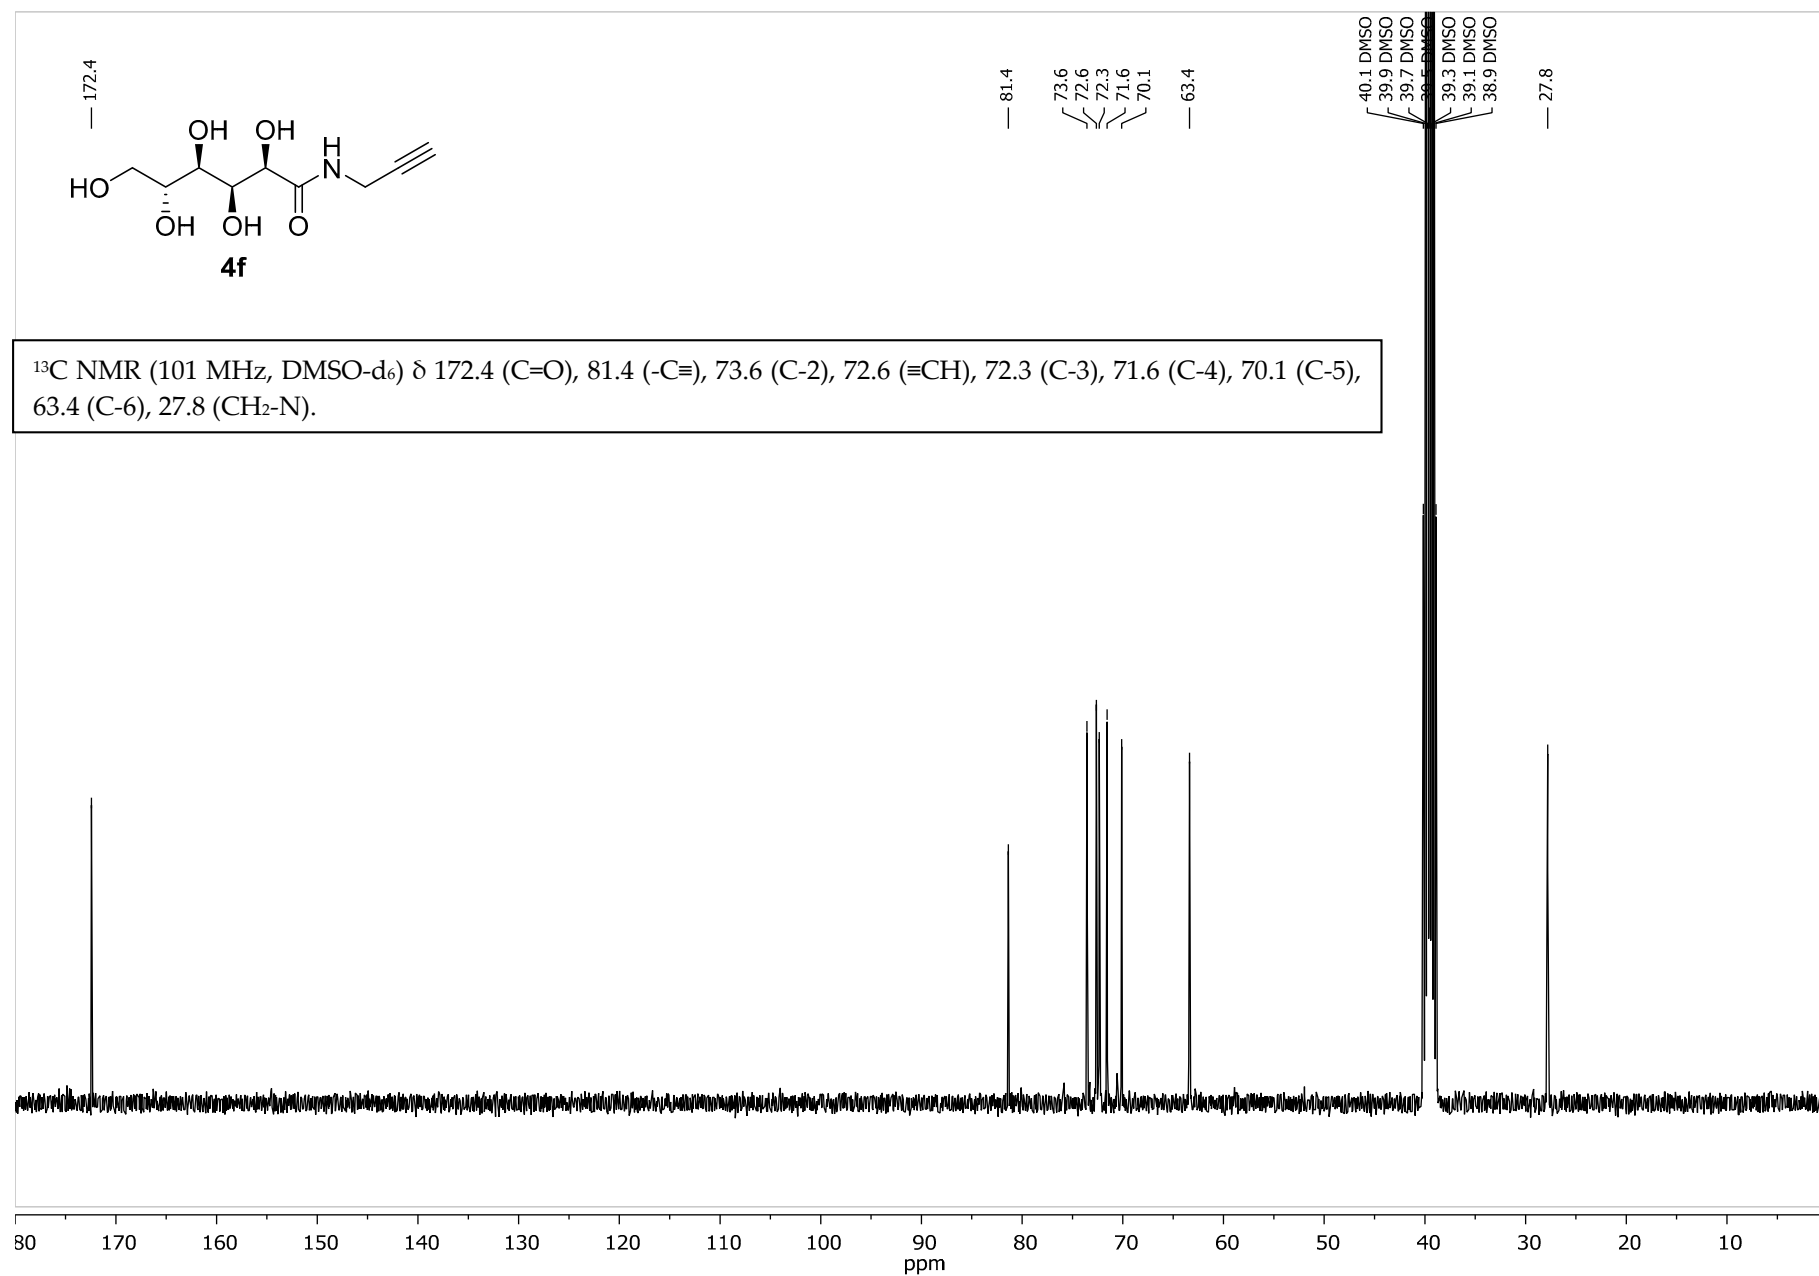

**Figure S21:  $^1\text{H}$  NMR spectrum of 4h crude**

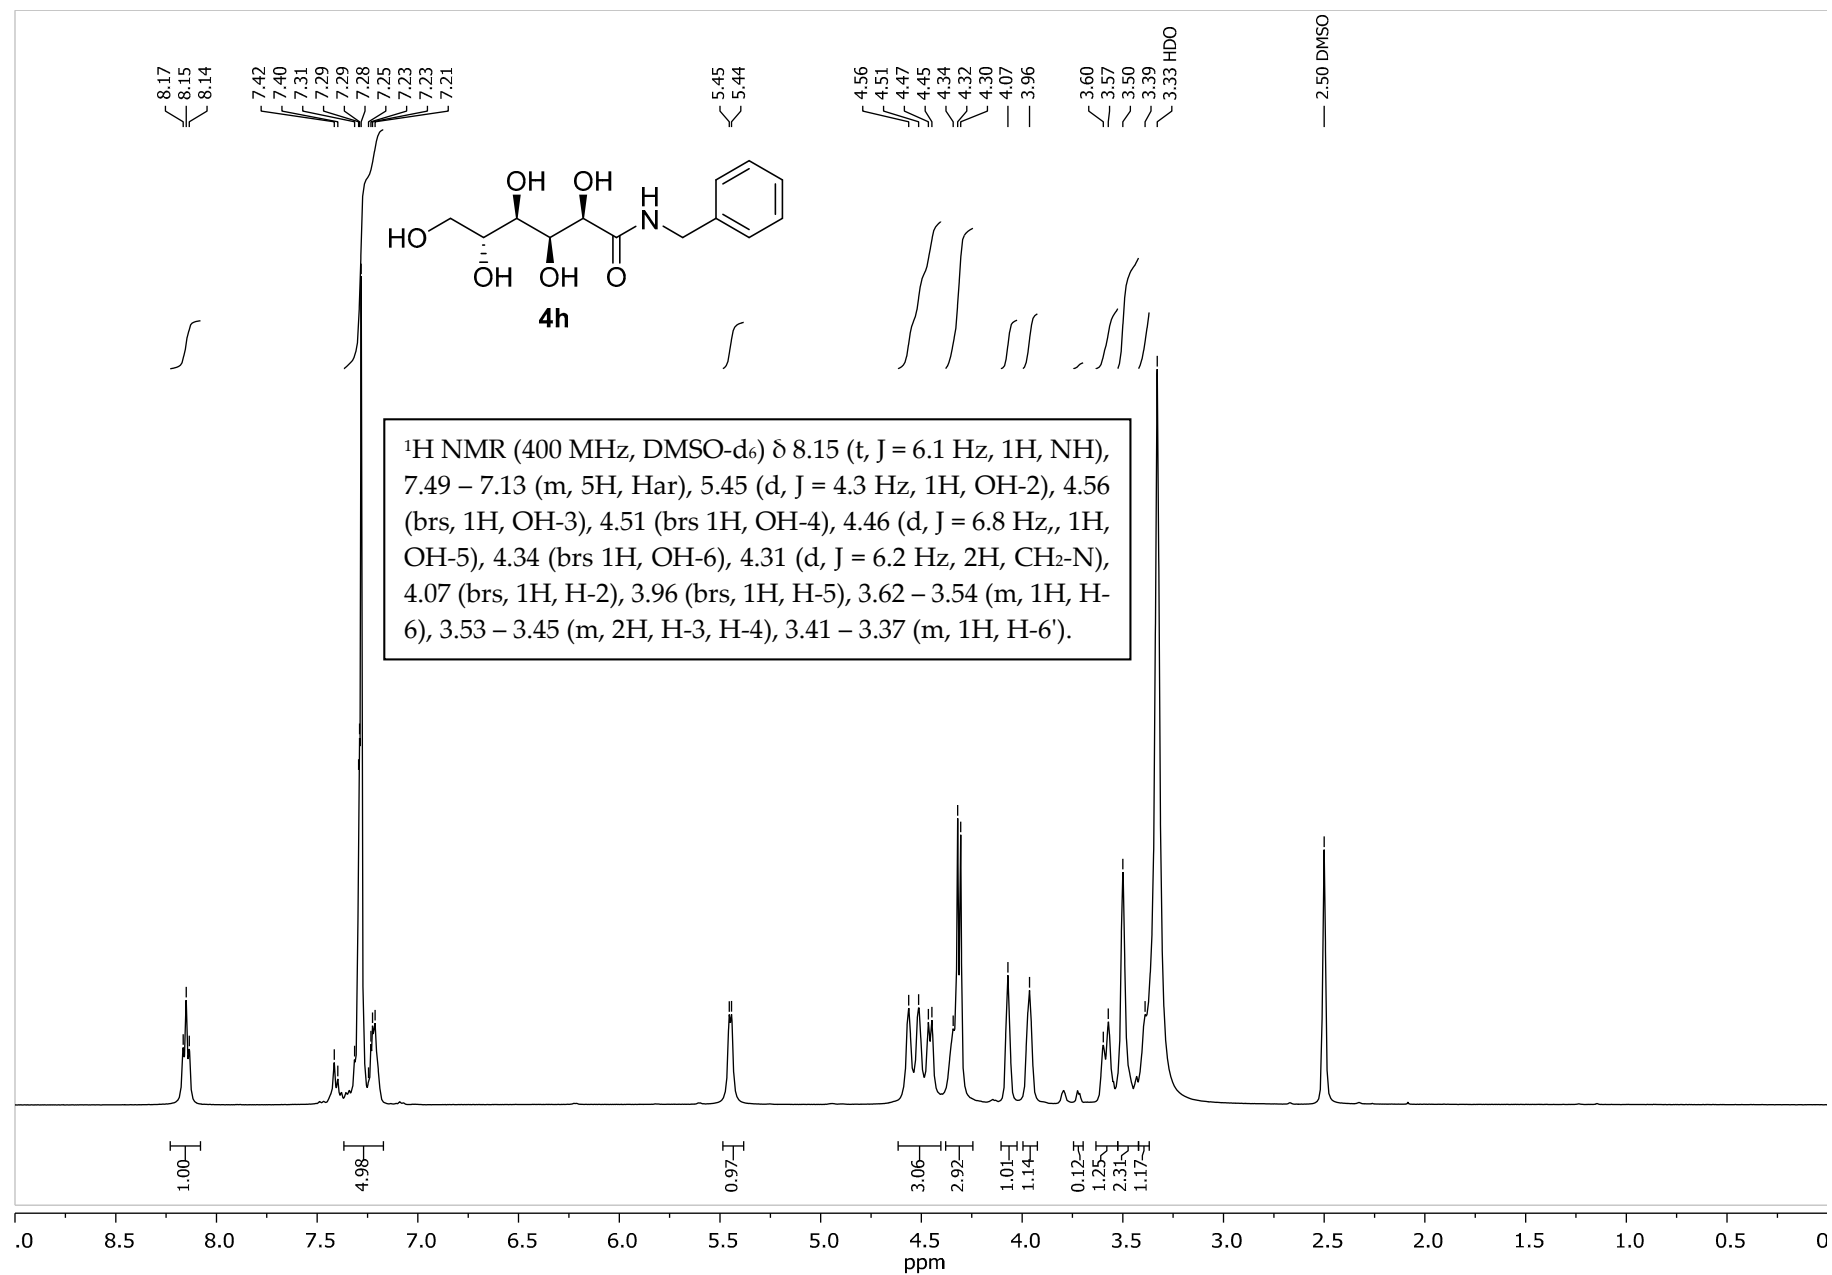



**Figure S22:  $^{13}\text{C}$  NMR spectrum of 4h crude**

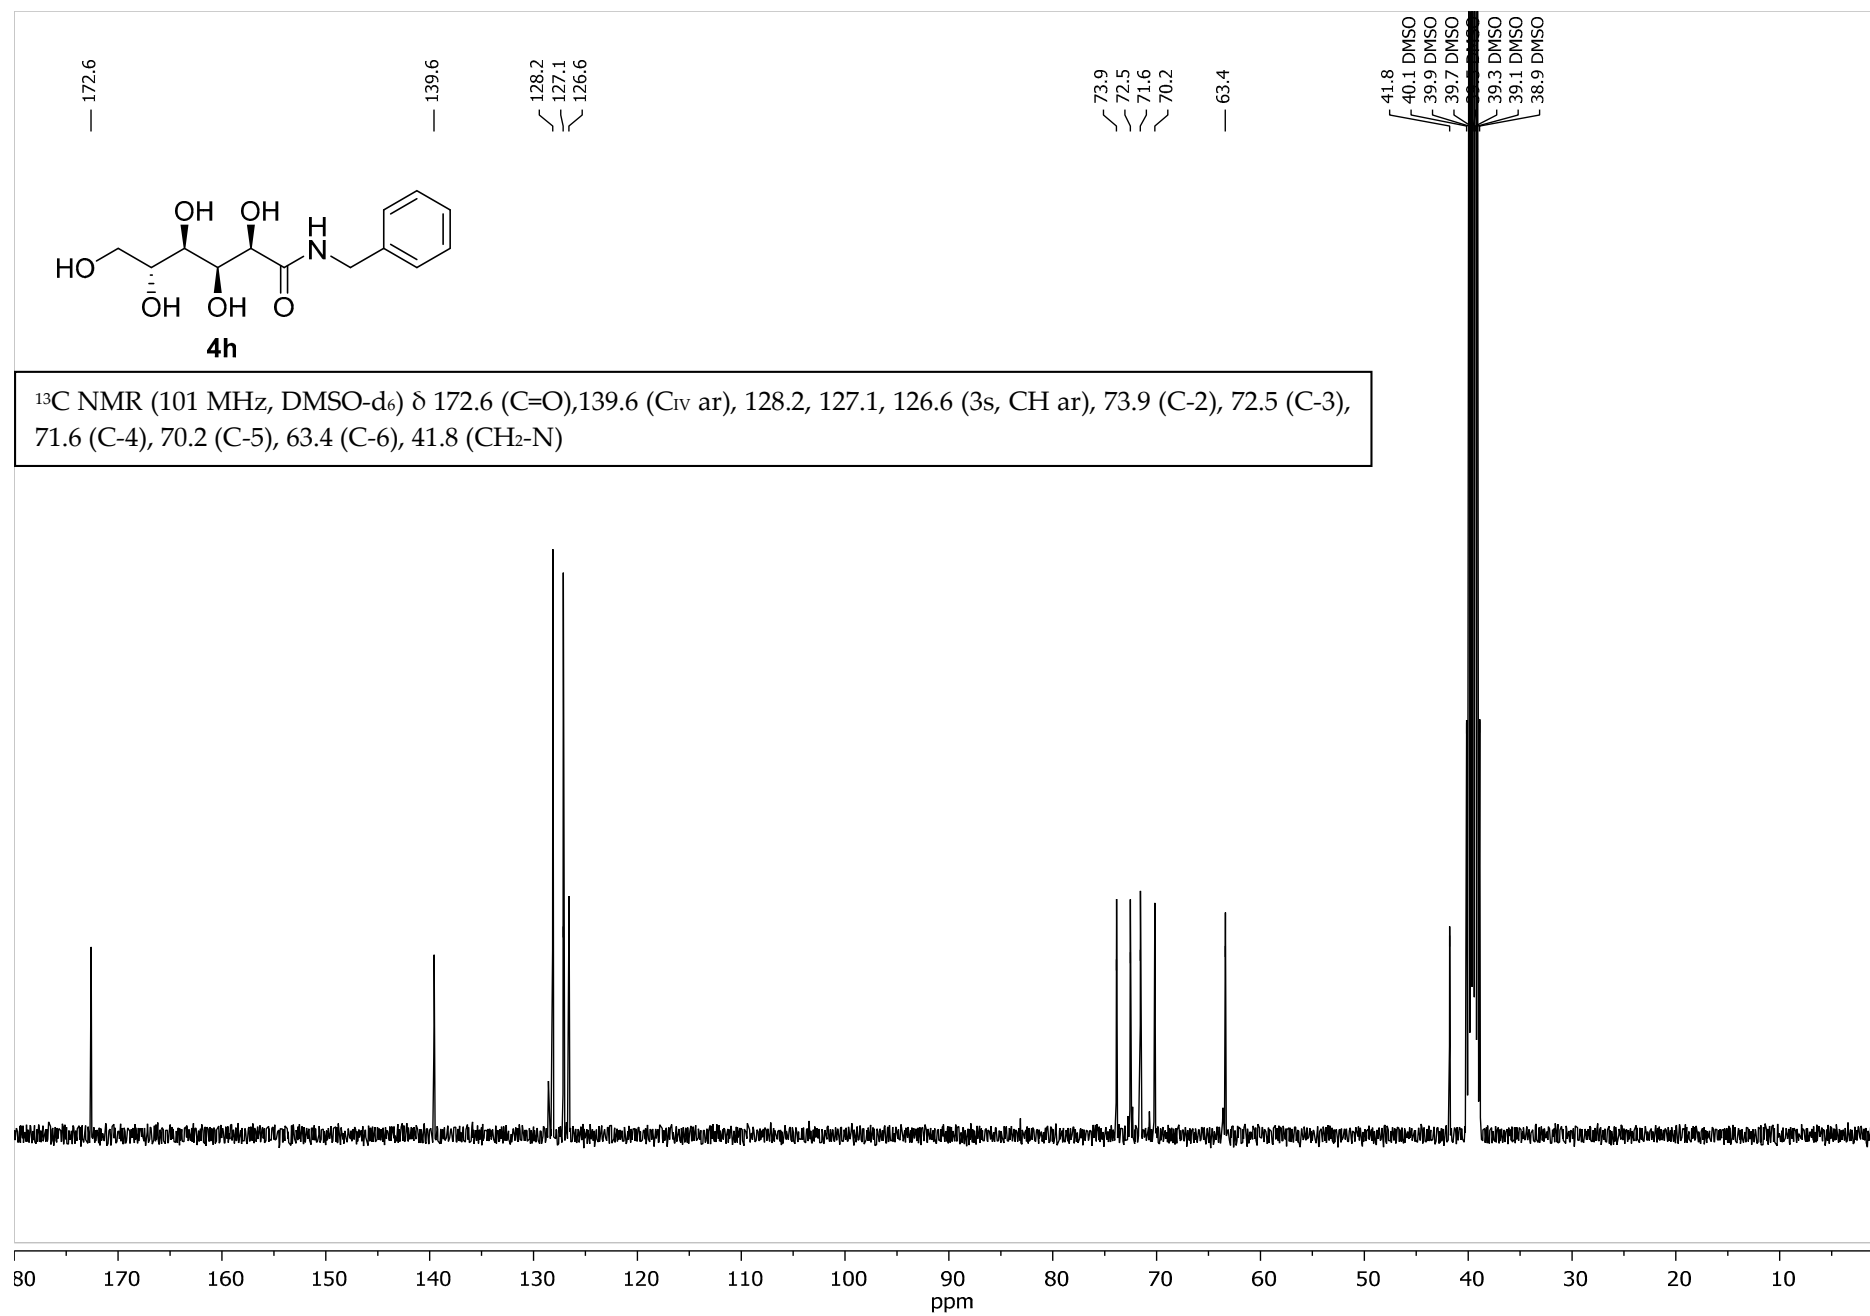

**Figure S23:  $^1\text{H}$  NMR spectrum of 4i' crude**

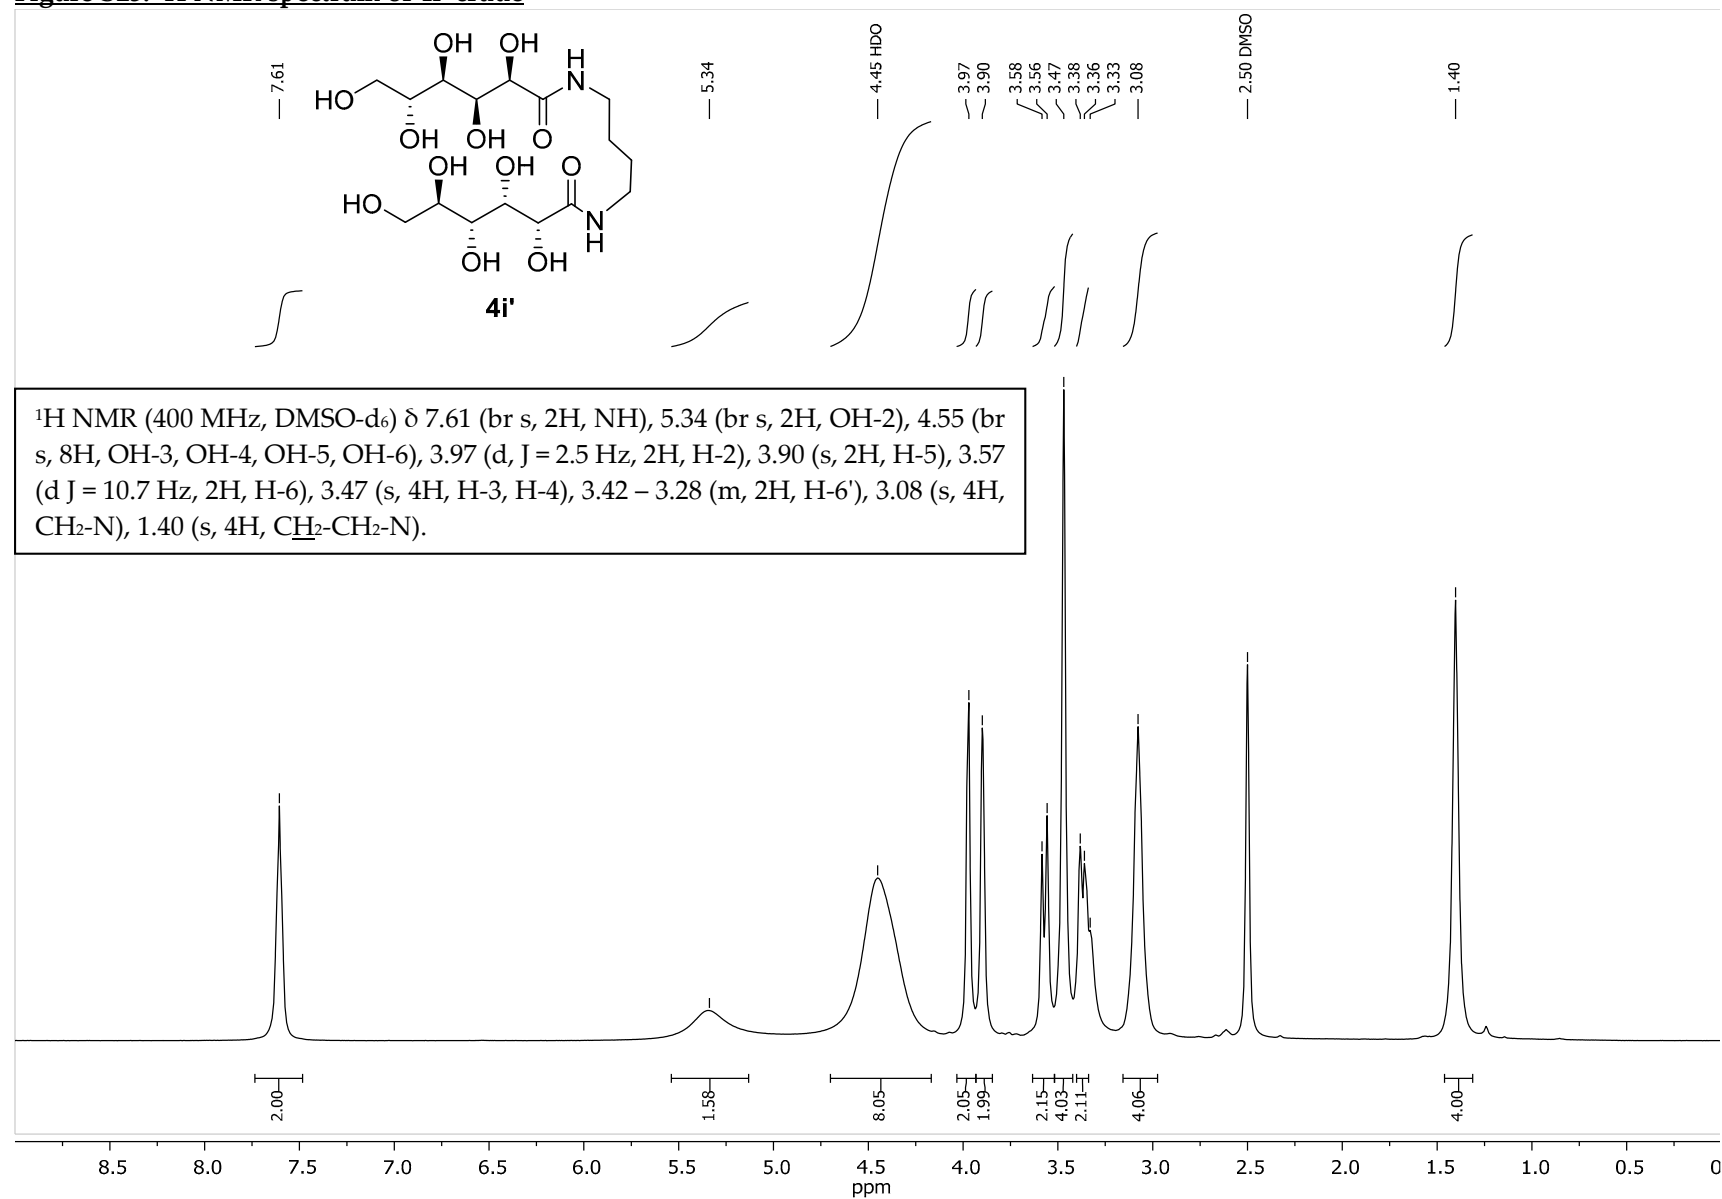

**Figure S24:**  $^{13}\text{C}$  NMR spectrum of **4i'** crude

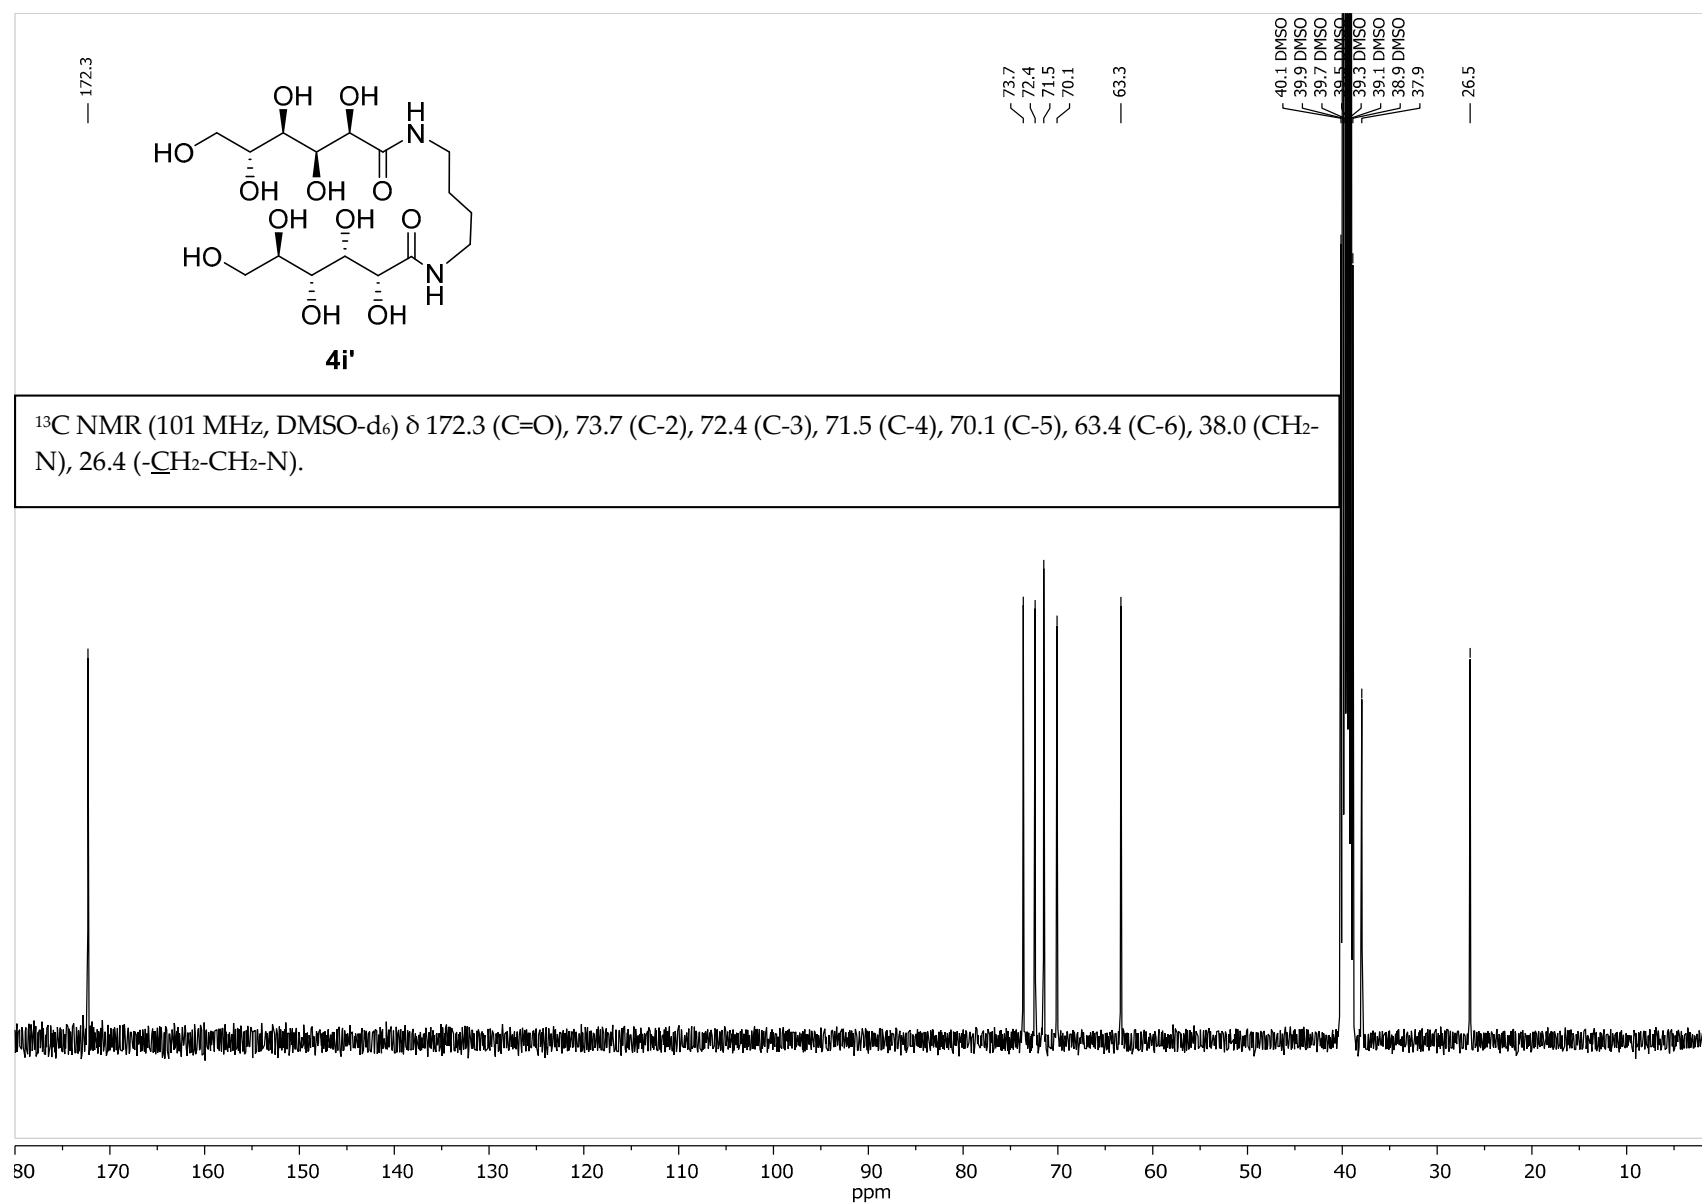

**Figure S25: COSY NMR 2D spectrum of 4i' crude**

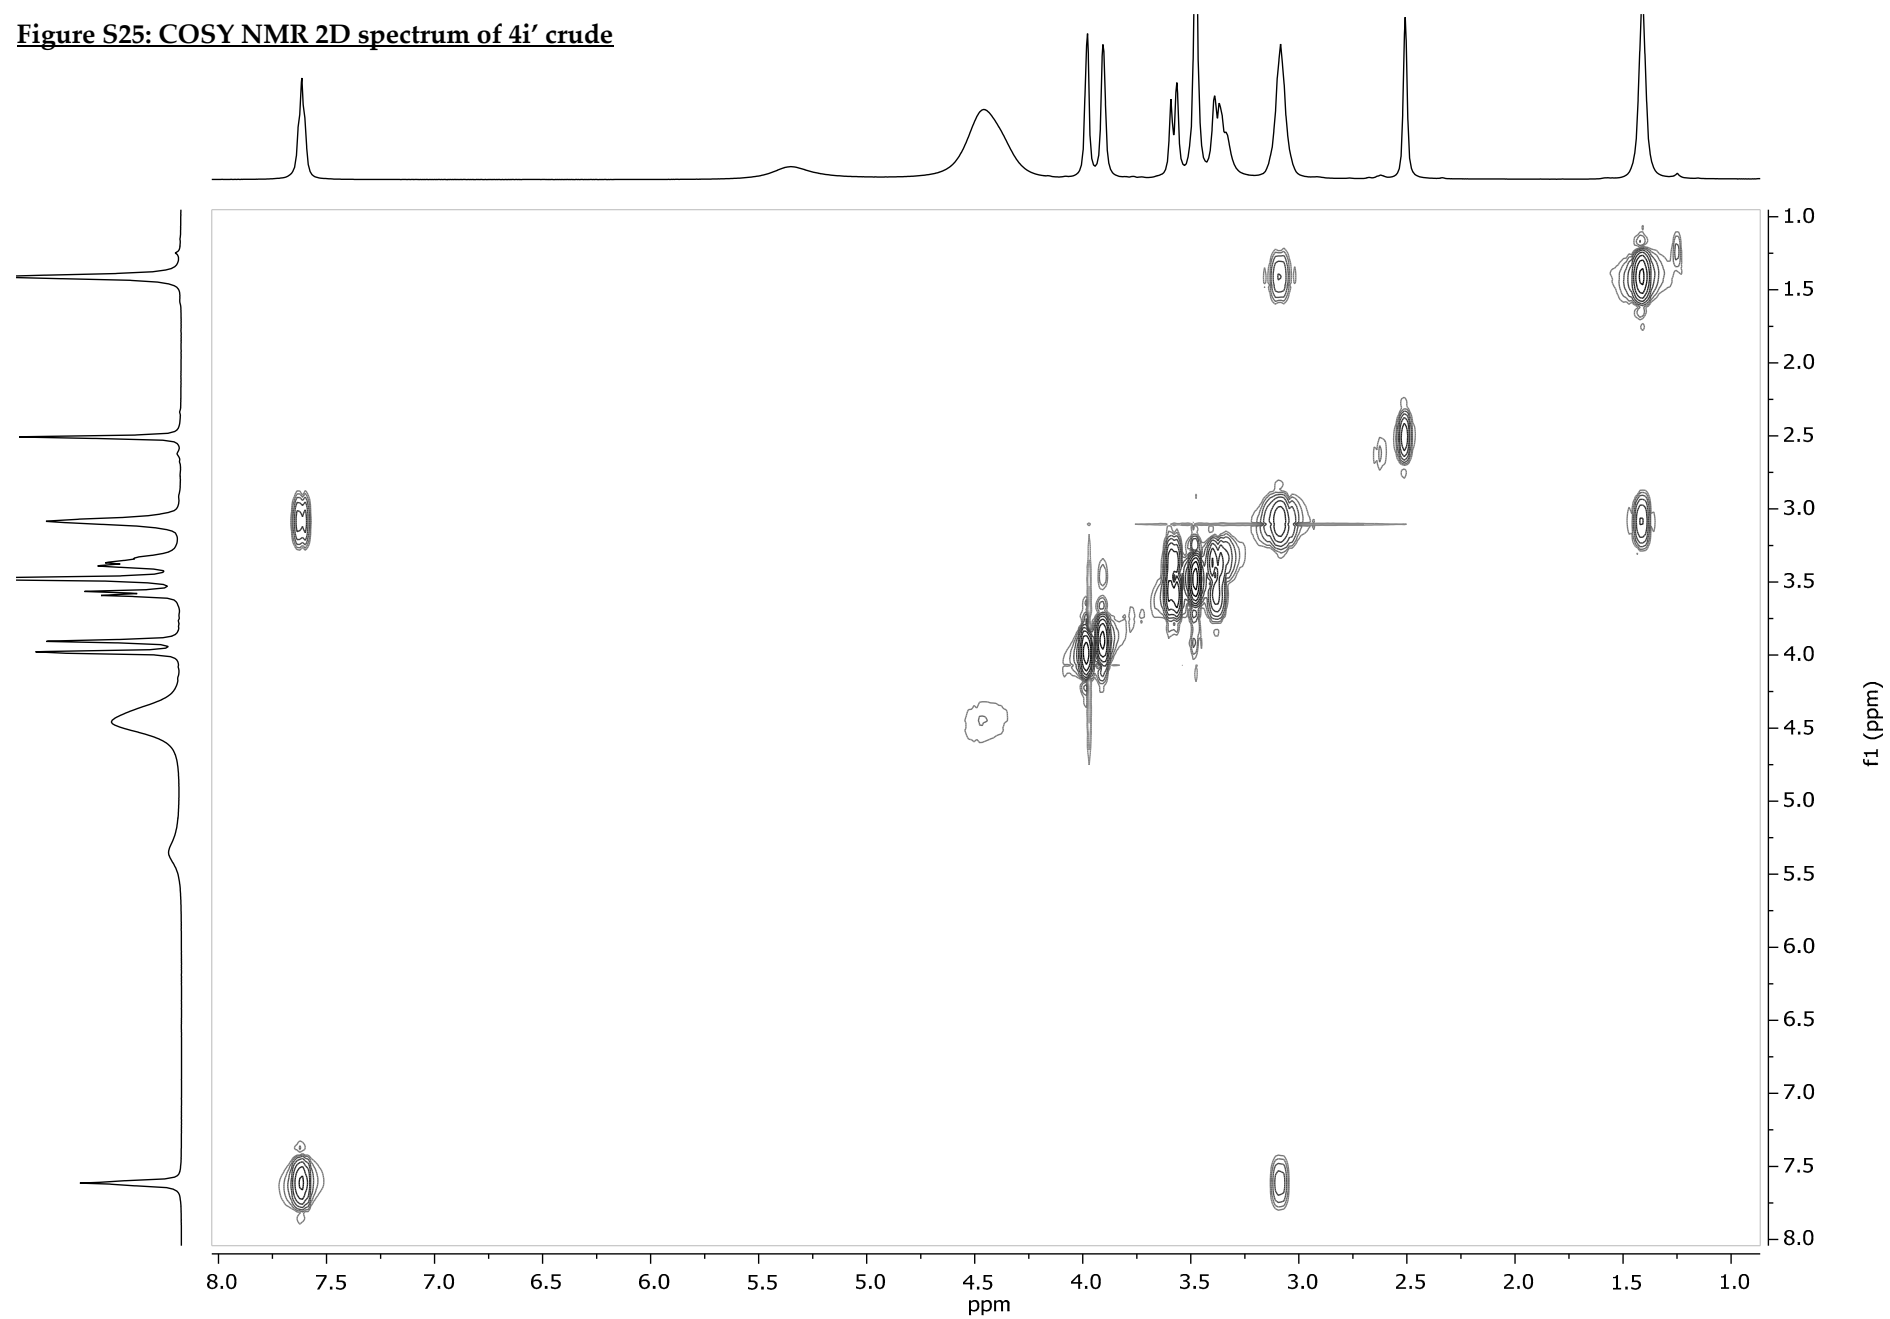

**Figure S26: HSQC  $^{13}\text{C}$ - $^1\text{H}$  NMR 2D spectrum of 4i' crude**

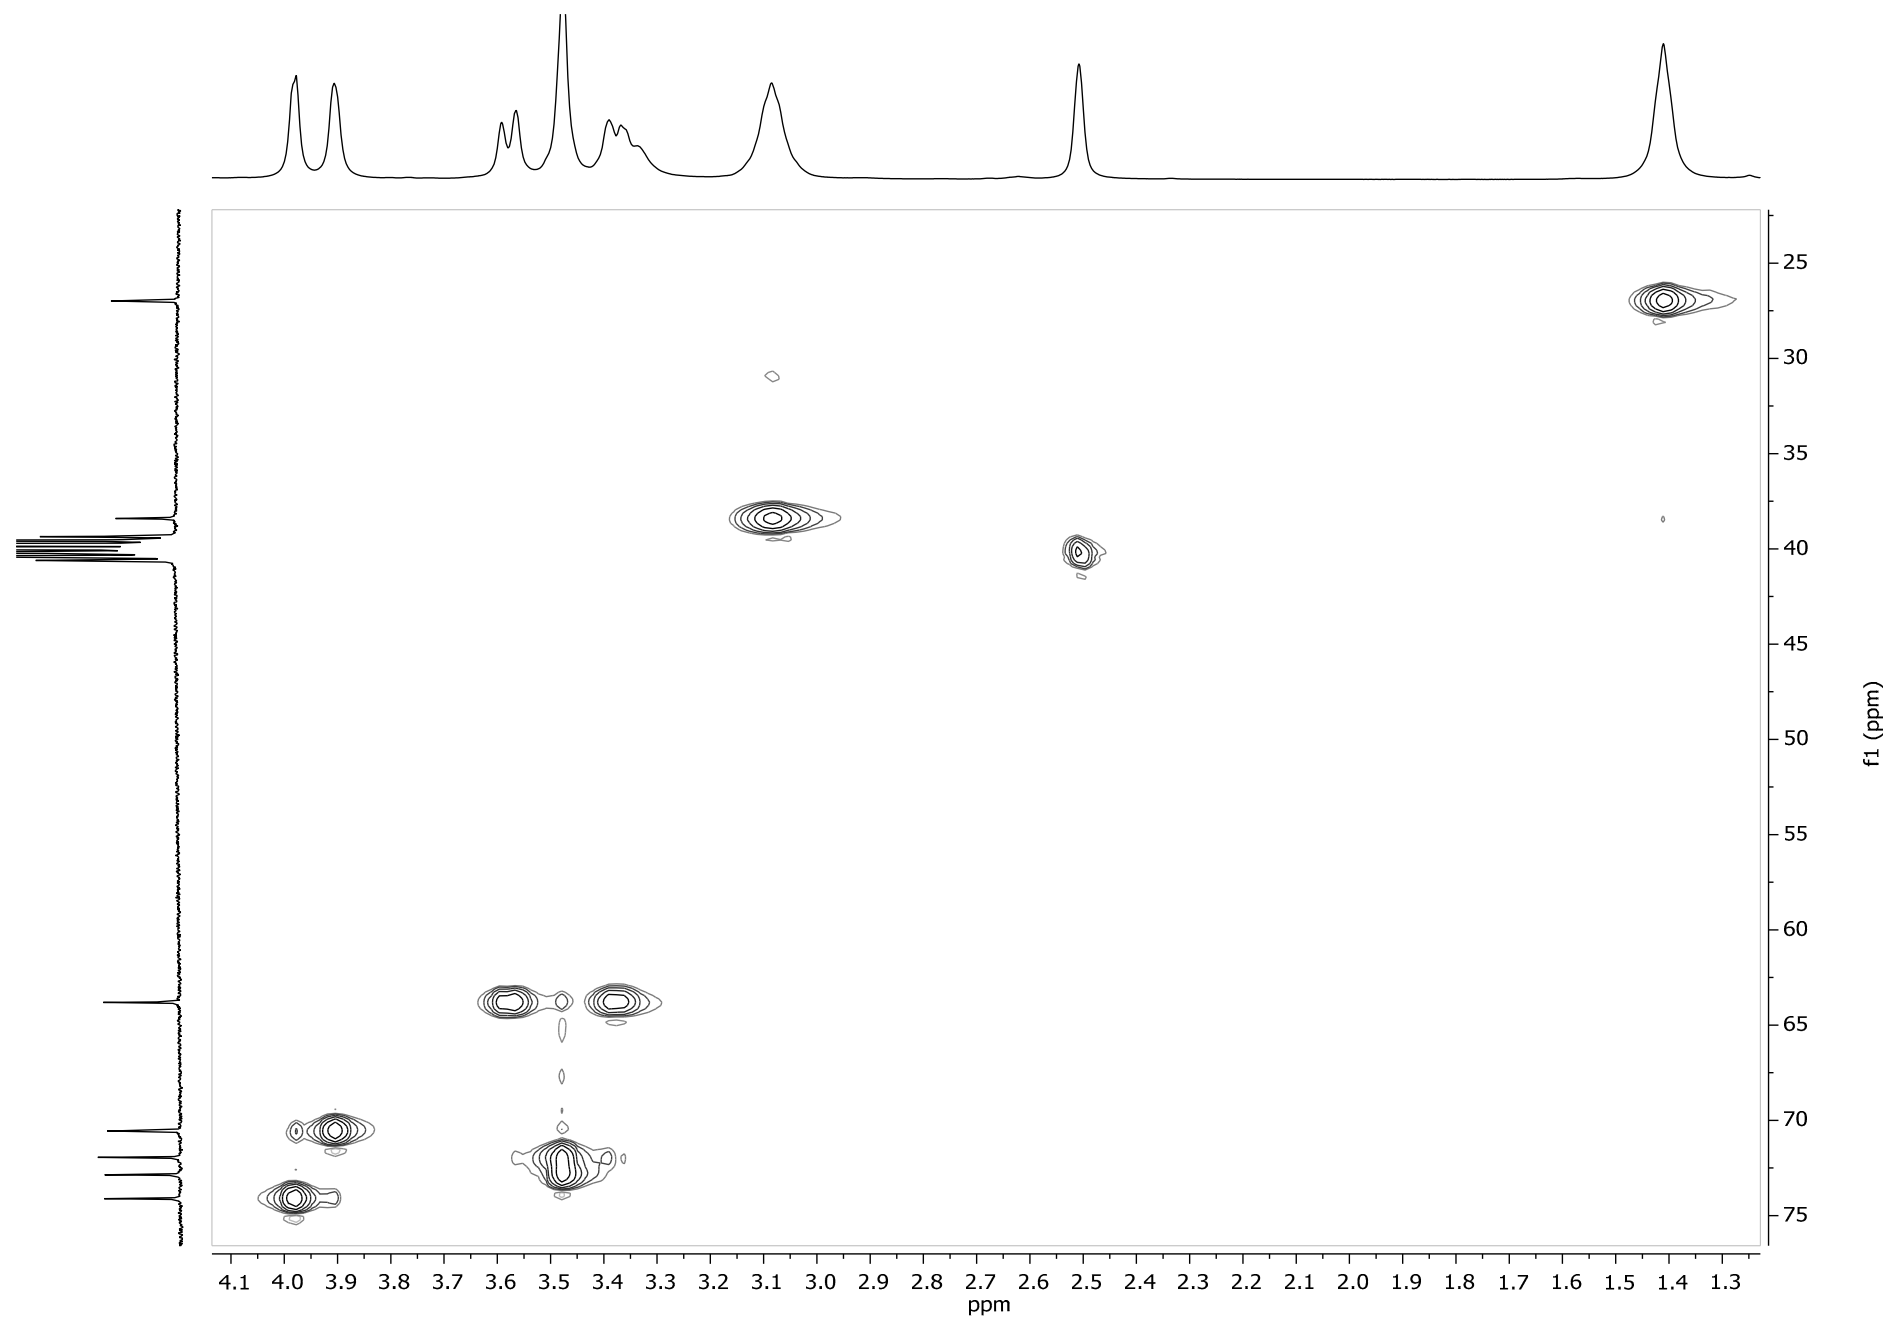

**Figure S27: HRMS analysis of 4i' crude**

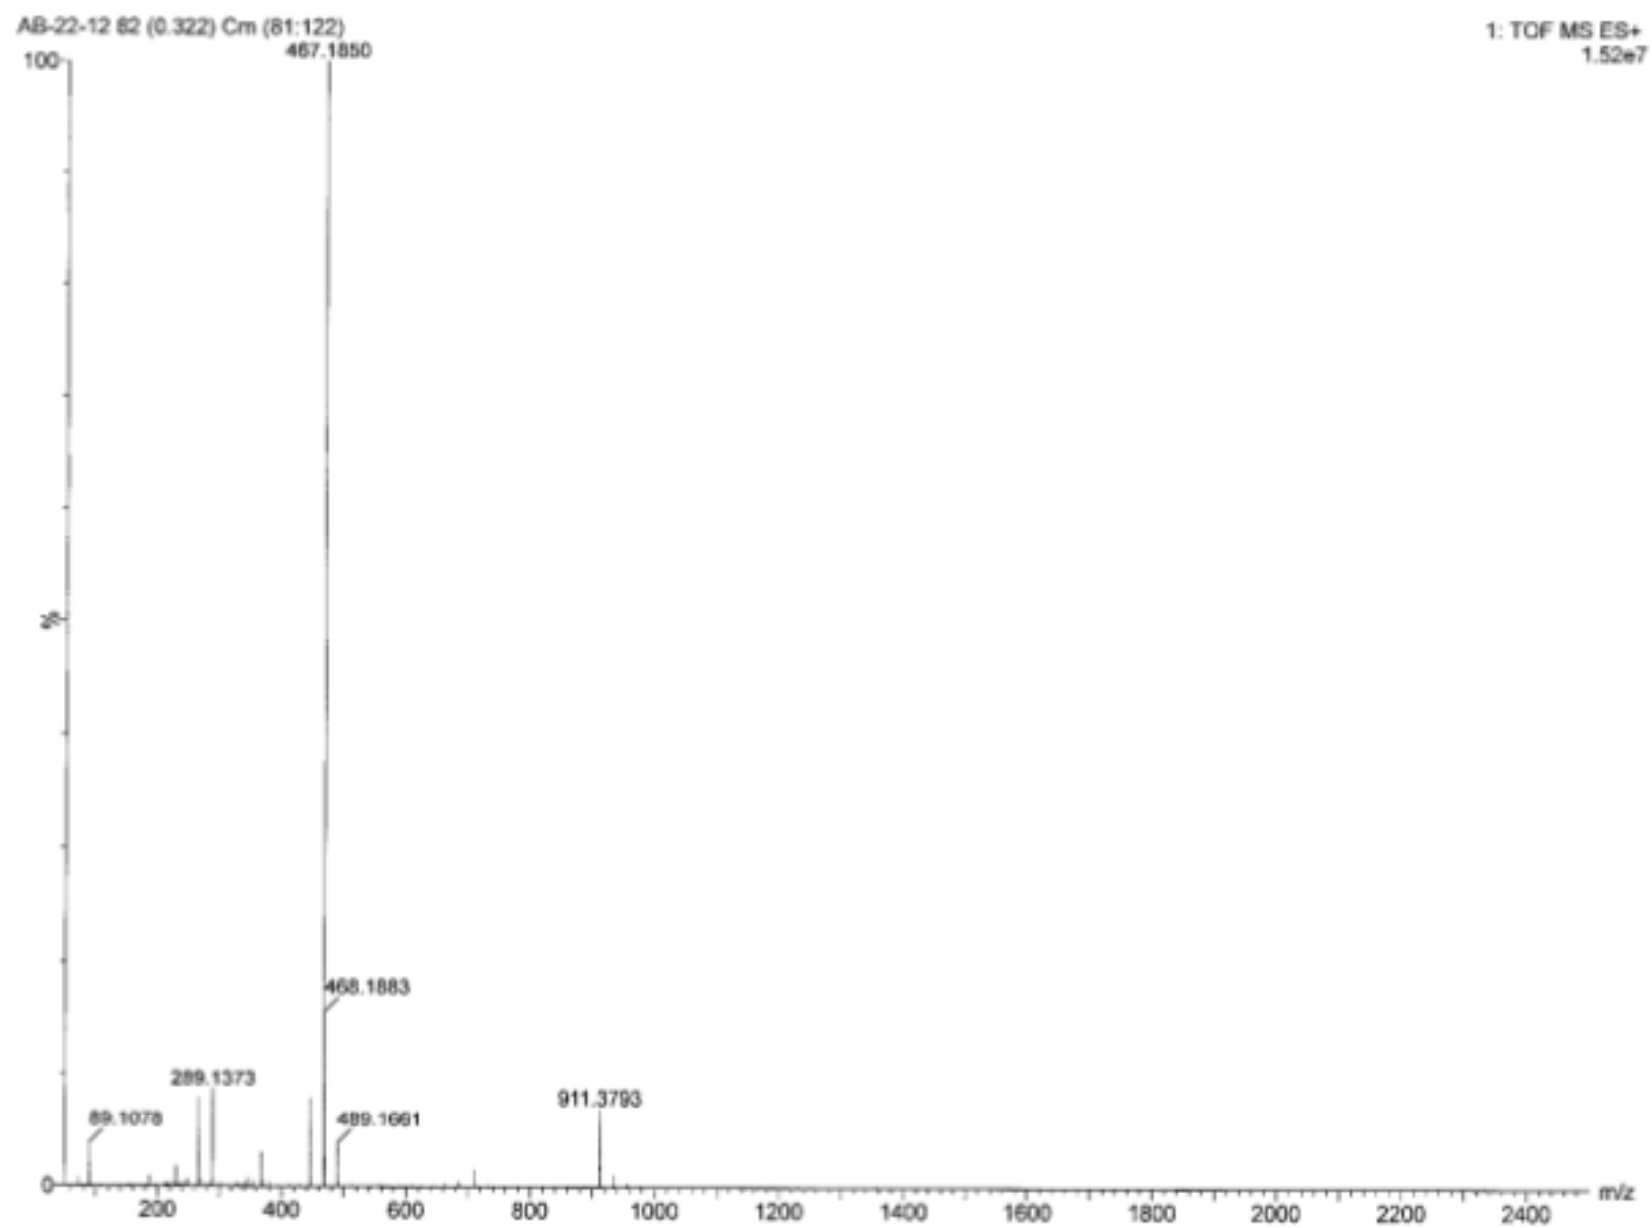

AB-22-12 (0.027) Is (1.00,1.00) C<sub>16</sub>H<sub>32</sub>N<sub>2</sub>O<sub>12</sub>Na

1: TOF MS ES+  
8.09e12

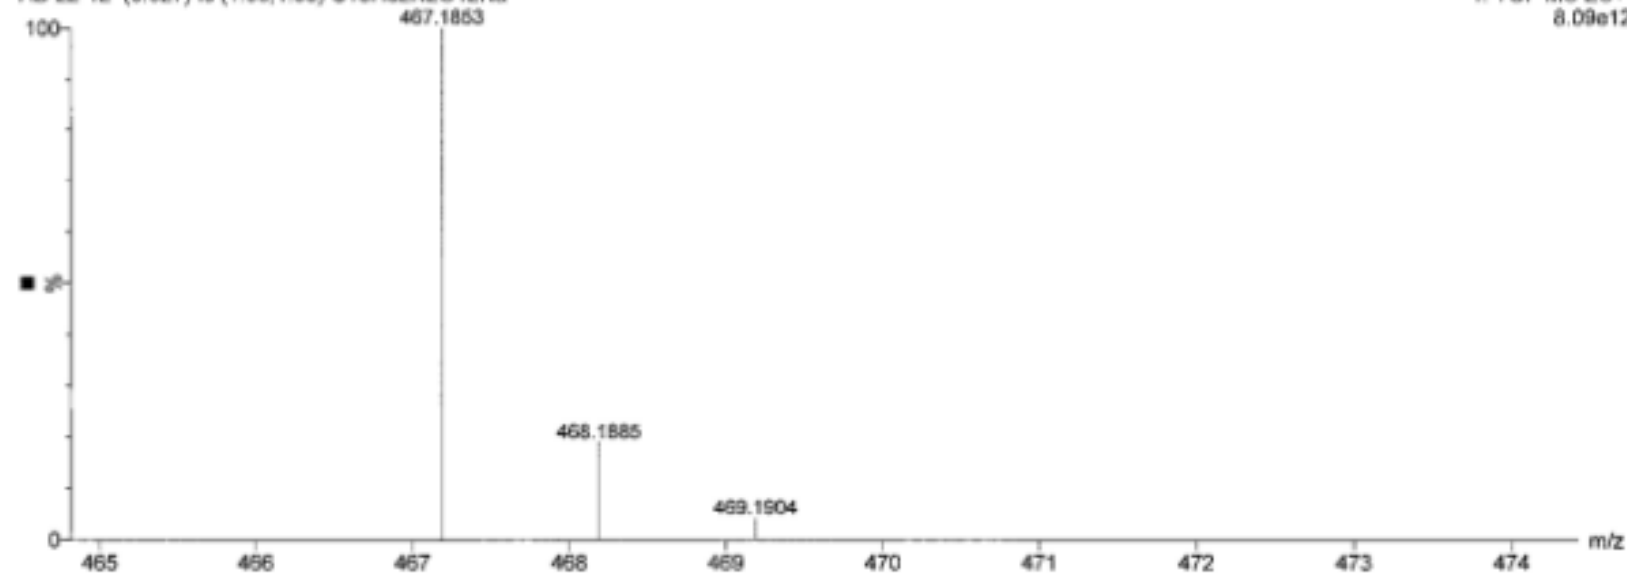

AB-22-12 82 (0.322) Cm (81:122)

1: TOF MS ES+  
1.52e7

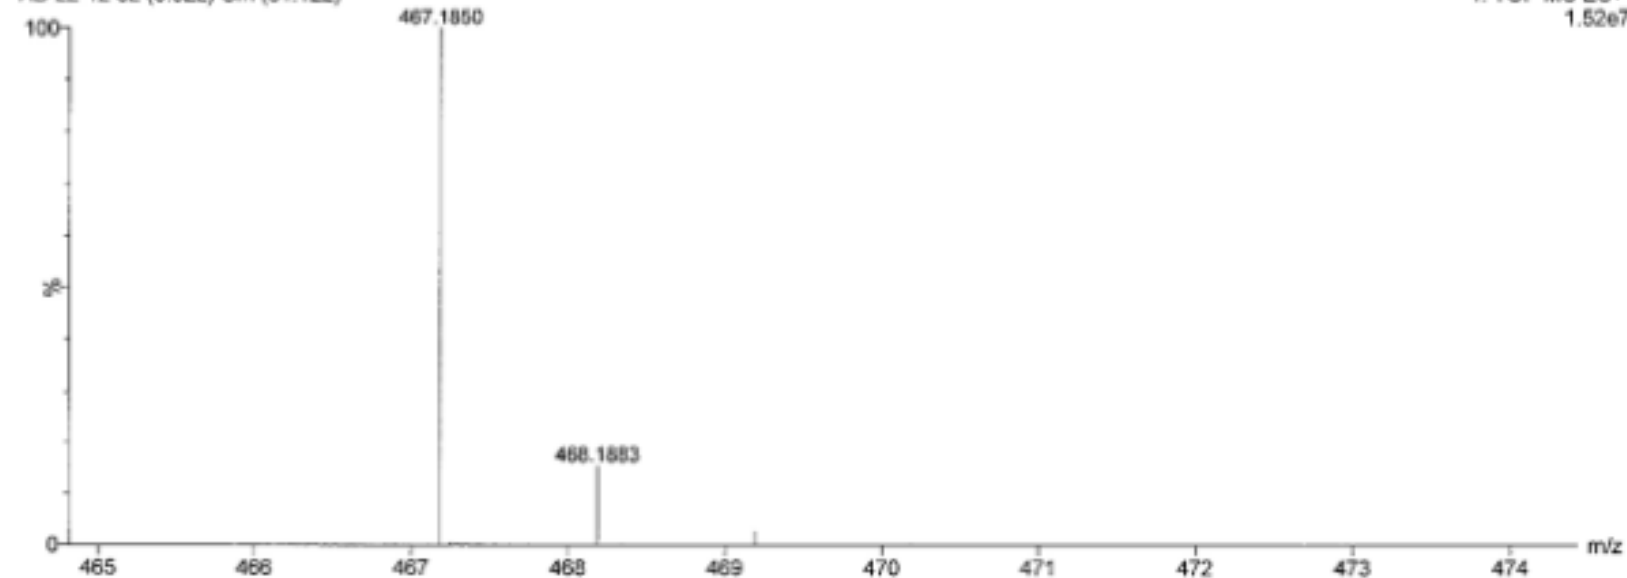

# Elemental Composition Report

Page 1

## Single Mass Analysis

Tolerance = 5.0 PPM / DBE: min = -5.0, max = 150.0

Element prediction: Off

Number of isotope peaks used for i-FIT = 3

Monoisotopic Mass, Even Electron Ions

2246 formula(e) evaluated with 9 results within limits (up to 50 closest results for each mass)

Elements Used:

C: 0-50 H: 0-100 N: 0-10 O: 0-50 Na: 0-1

AB-22-12 82 (0.322) Cm (81:122)

1: TOF MS ES+  
1.52e+007

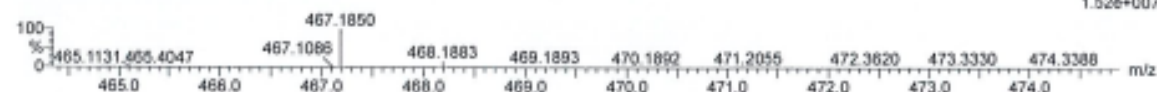

Minimum: -5.0  
Maximum: 5.0 5.0 150.0

| Mass     | Calc. Mass | mDa  | PPM  | DBE  | i-FIT  | Norm   | Conf(%) | Formula           |
|----------|------------|------|------|------|--------|--------|---------|-------------------|
| 467.1850 | 467.1850   | 0.0  | 0.0  | 5.5  | 3167.6 | 0.908  | 40.34   | C14 H27 N8 O10    |
|          | 467.1848   | 0.2  | 0.4  | 19.5 | 3175.3 | 8.635  | 0.02    | C29 H24 N4 O Na   |
|          | 467.1853   | -0.3 | -0.6 | 1.5  | 3168.1 | 1.373  | 25.33   | C16 H32 N2 O12 Na |
|          | 467.1858   | -0.8 | -1.7 | 17.5 | 3176.0 | 9.334  | 0.01    | C30 H27 O5        |
|          | 467.1837   | 1.3  | 2.8  | 0.5  | 3167.9 | 1.143  | 31.88   | C13 H31 N4 O14    |
|          | 467.1834   | 1.6  | 3.4  | 14.5 | 3175.3 | 8.545  | 0.02    | C28 H28 O5 Na     |
|          | 467.1866   | -1.6 | -3.4 | 6.5  | 3170.5 | 3.745  | 2.36    | C17 H28 N6 O8 Na  |
|          | 467.1832   | 1.8  | 3.9  | 18.5 | 3174.7 | 7.964  | 0.03    | C26 H23 N6 O3     |
|          | 467.1872   | -2.2 | -4.7 | 22.5 | 3177.0 | 10.245 | 0.00    | C31 H23 N4 O      |



**Figure S28: IR analysis of 4i' crude**

|                     |                      |                     |                                                              |                                            |
|---------------------|----------------------|---------------------|--------------------------------------------------------------|--------------------------------------------|
| <b>Title</b>        | AB-22-121            | <b>File Name</b>    | C:\PROGRAM FILES (X86)\LABSOLUTIONS\IR\DATA\ABED\AB-22-12.DX |                                            |
| <b>Date</b>         | 07 Jun 2022 16:47:58 | <b>Technique</b>    | Infrared                                                     | <b>Spectral Region</b> IR                  |
| <b>X Axis</b>       | Wavenumber (cm-1)    | <b>Y Axis</b>       | %Transmittance                                               | <b>Spectrum Range</b> 700.1603 - 4000.3641 |
| <b>Points Count</b> | 1712                 | <b>Data Spacing</b> | 1.9288                                                       |                                            |

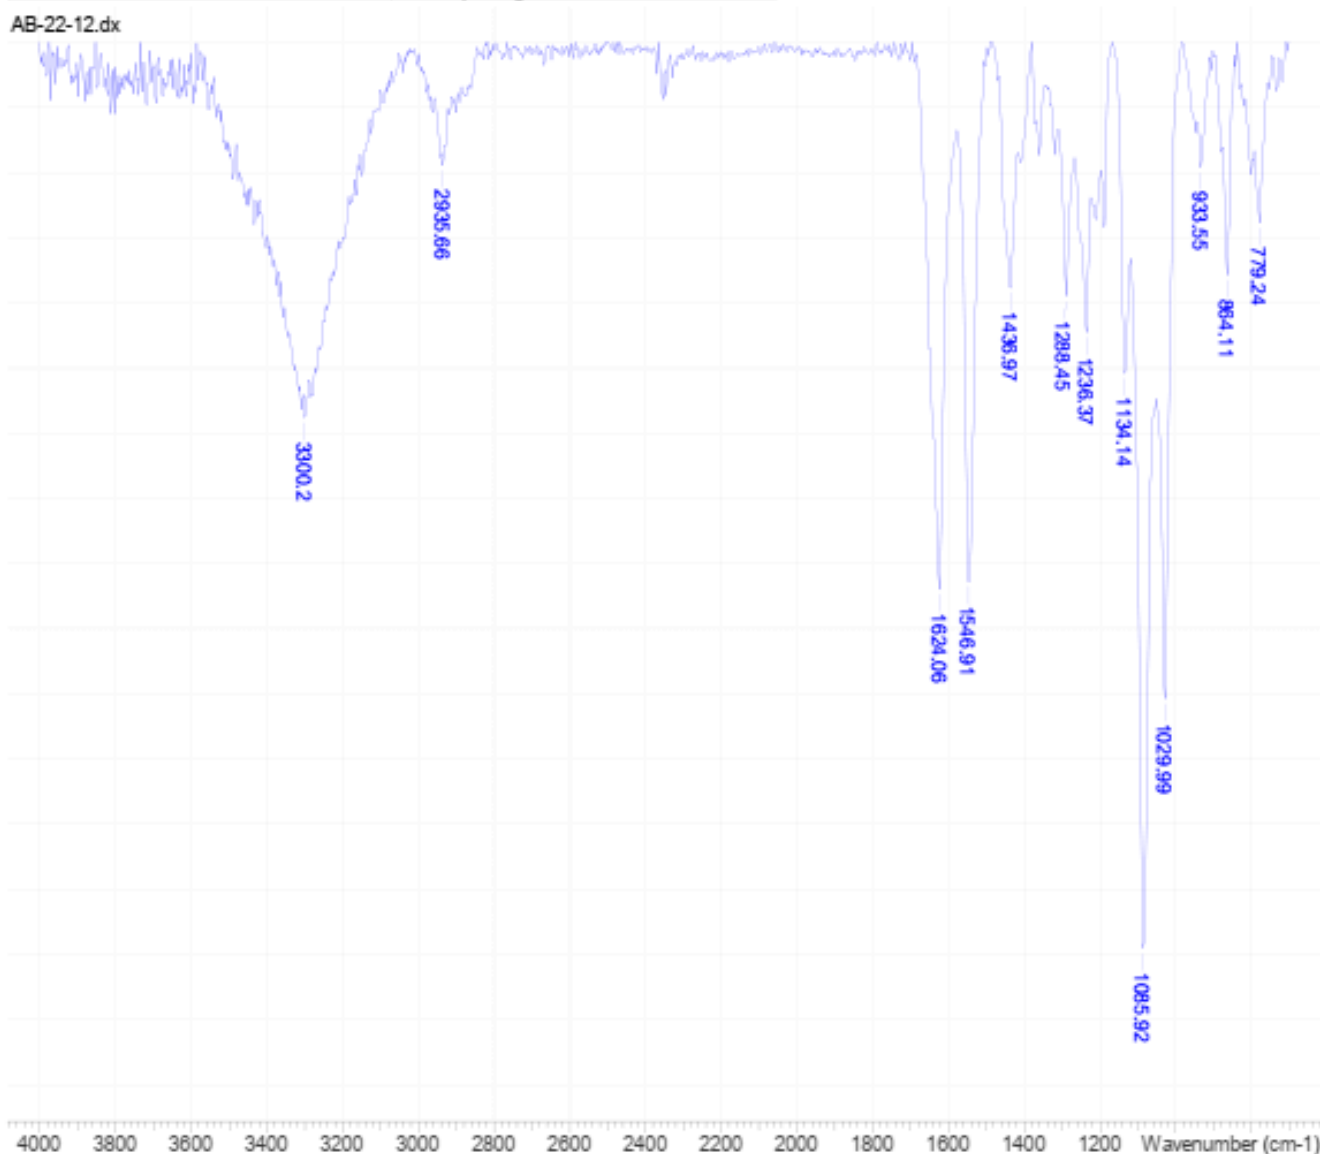

| No | cm-1    | %T     | Intensity |
|----|---------|--------|-----------|
| 1  | 779.24  | 97.229 | W         |
| 2  | 864.11  | 96.426 | W         |
| 3  | 933.55  | 98.081 | W         |
| 4  | 1029.99 | 89.926 | S         |
| 5  | 1085.92 | 86.097 | VS        |
| 6  | 1134.14 | 94.917 | M         |
| 7  | 1236.37 | 95.547 | M         |
| 8  | 1288.45 | 96.109 | W         |
| 9  | 1436.97 | 96.231 | W         |
| 10 | 1546.91 | 91.720 | M         |
| 11 | 1624.06 | 91.601 | S         |
| 12 | 2935.66 | 98.110 | W         |
| 13 | 3300.20 | 94.242 | M         |

**Figure S29:  $^1\text{H}$  NMR spectrum of 4j crude**

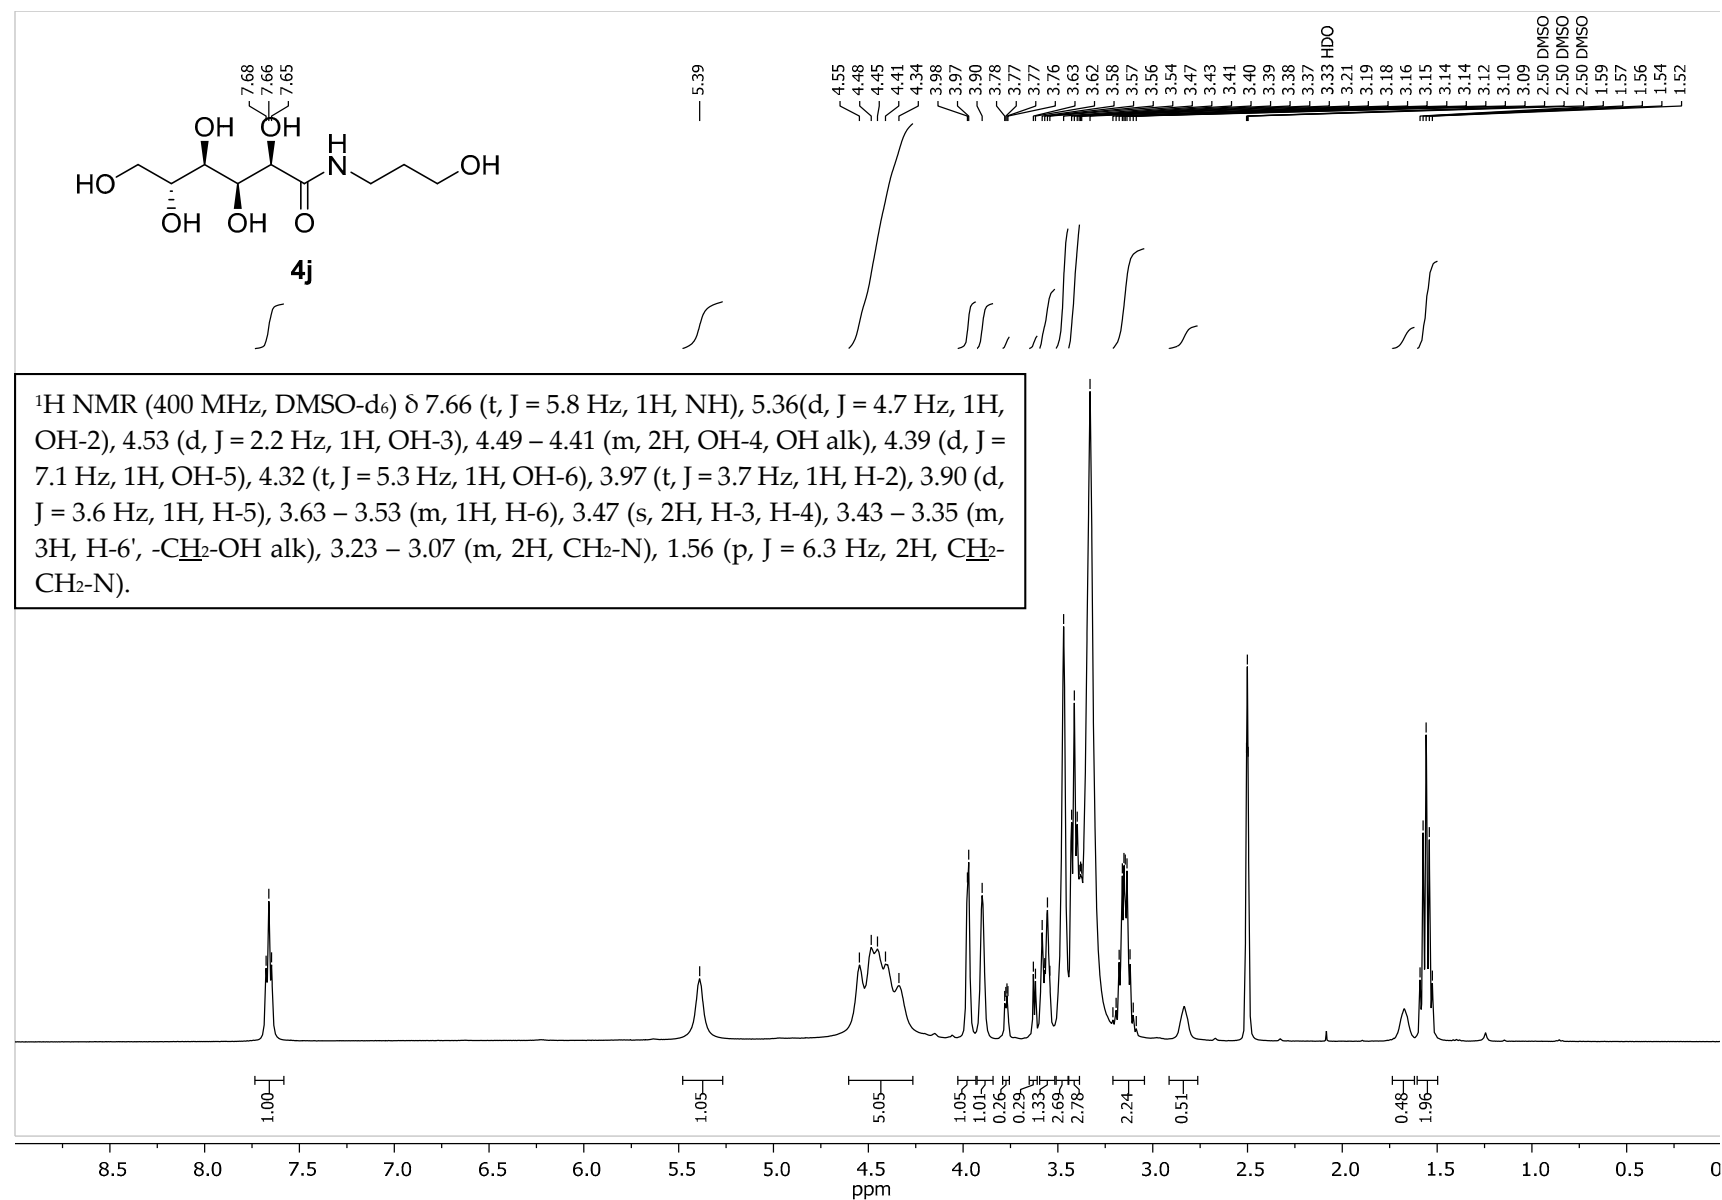

**Figure S30:  $^{13}\text{C}$  NMR spectrum of 4j crude**

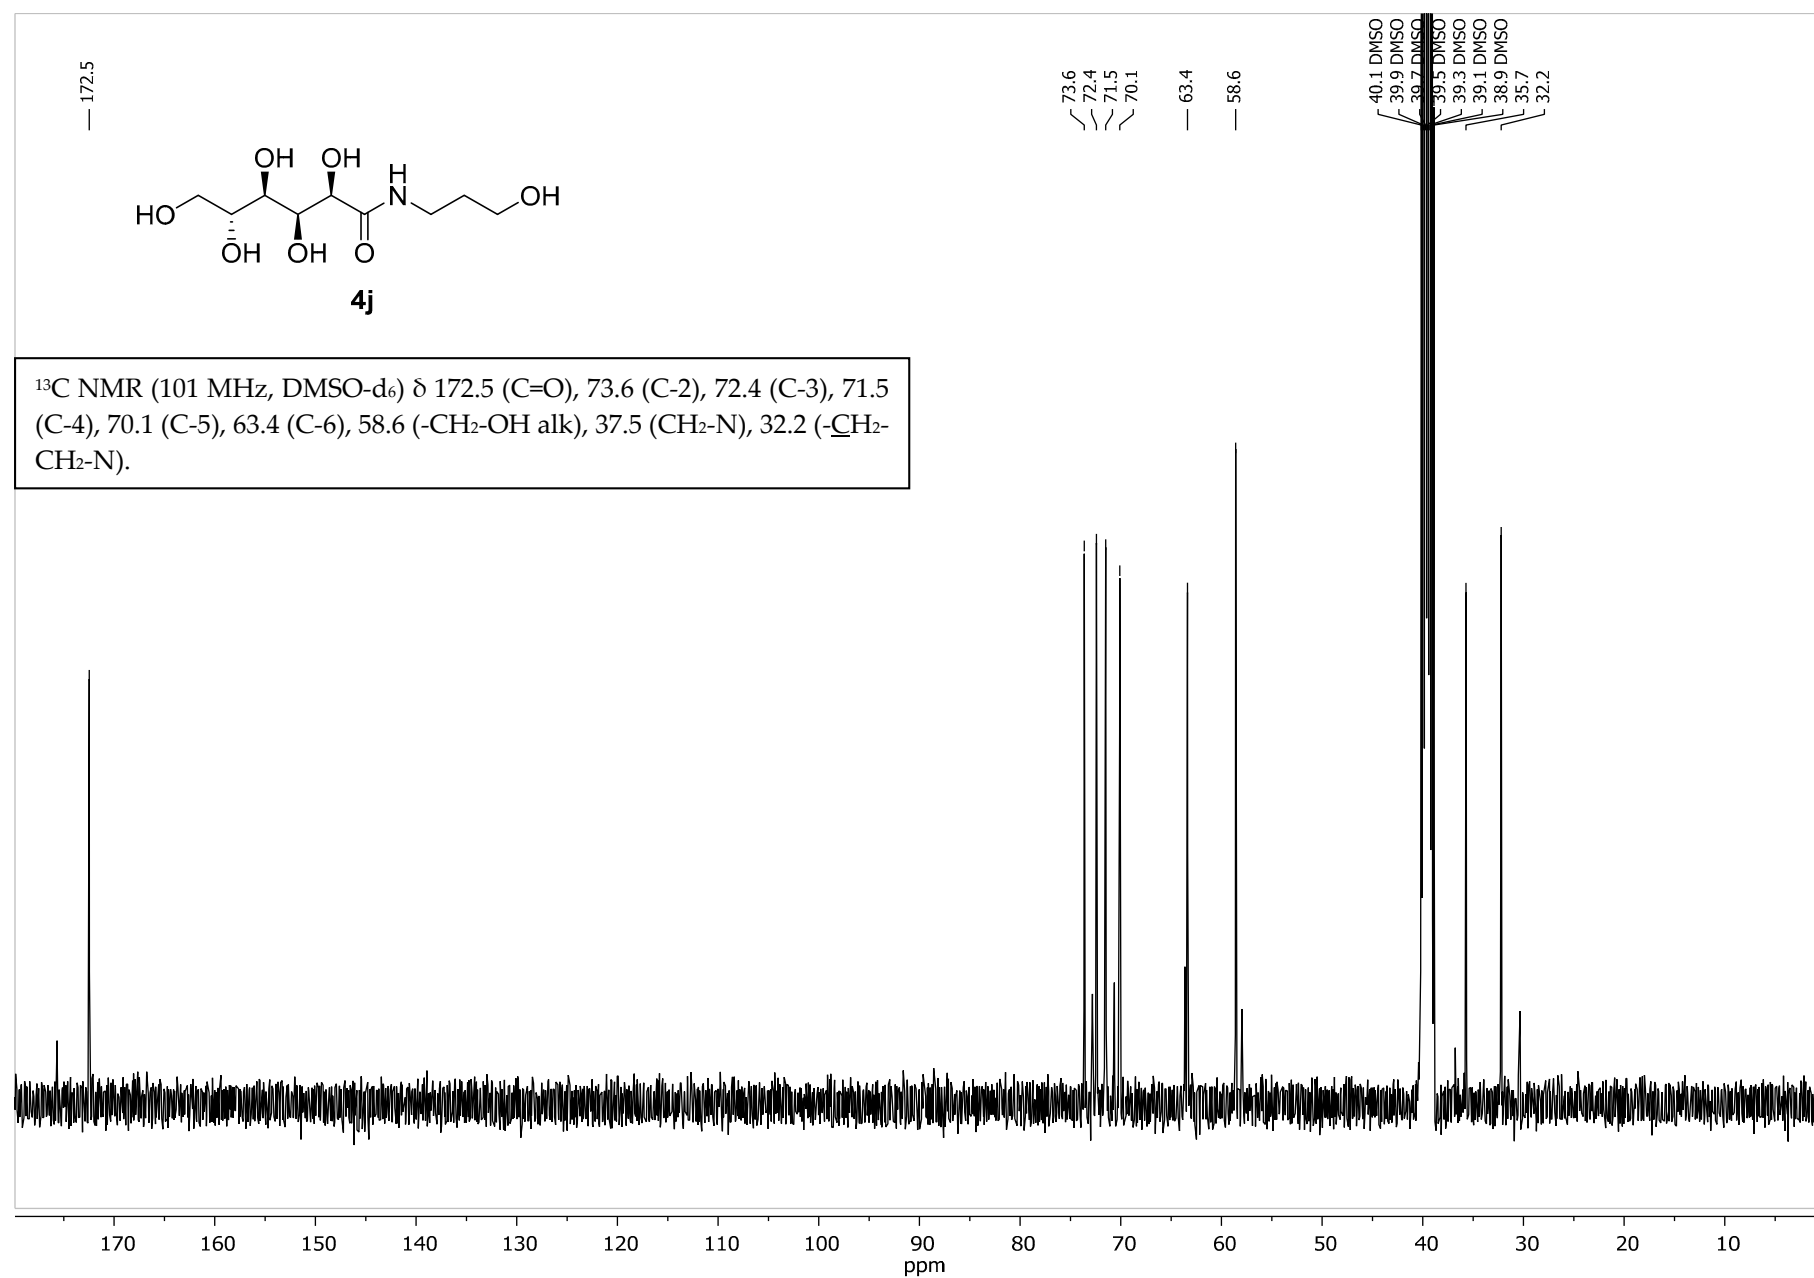

**Figure S31: COSY NMR 2D spectrum of 4j crude**

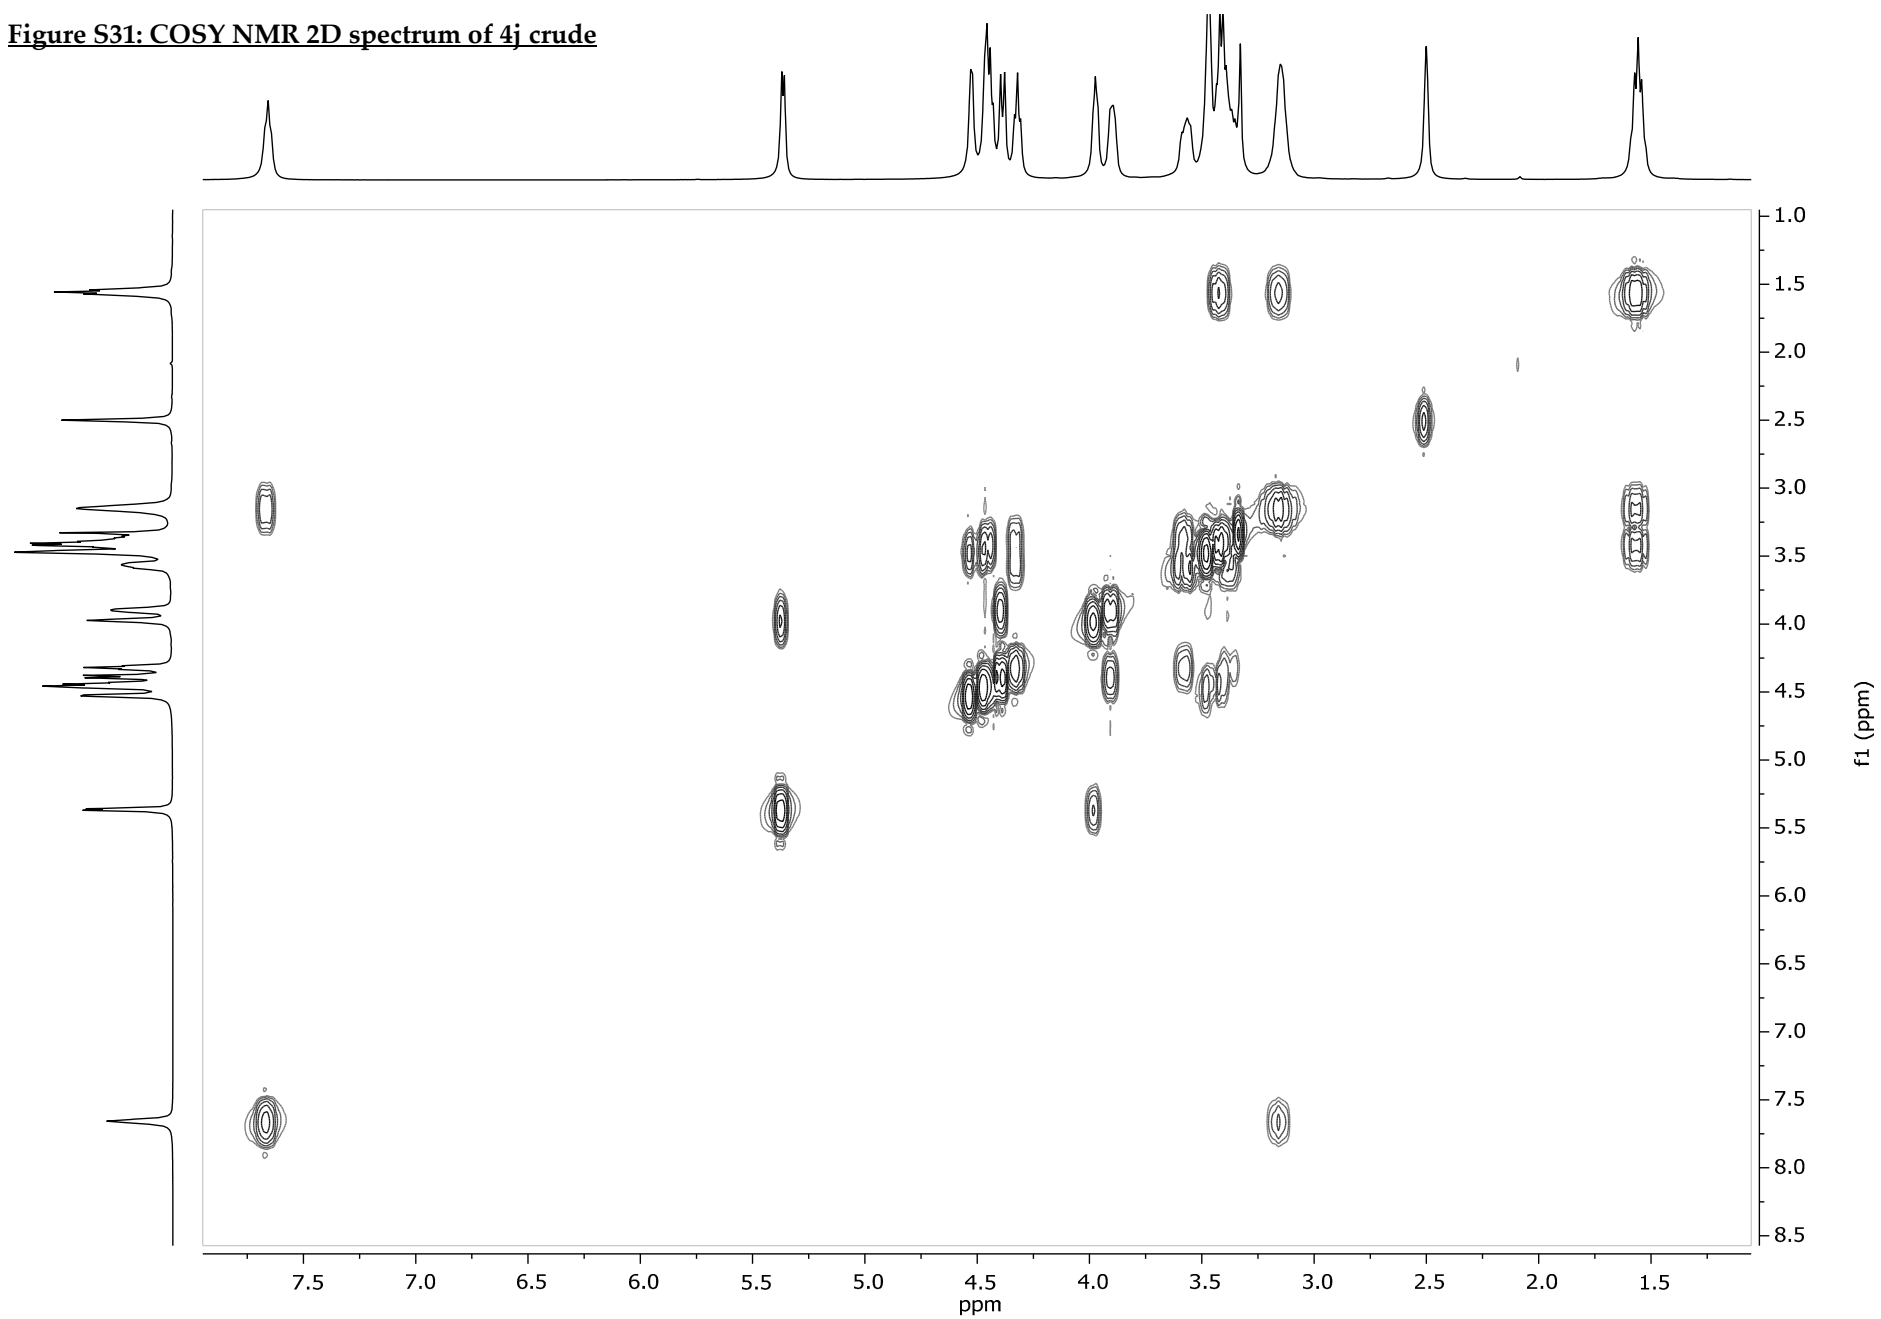

**Figure S32: HSQC  $^{13}\text{C}$ - $^1\text{H}$  NMR 2D spectrum of 4j crude**

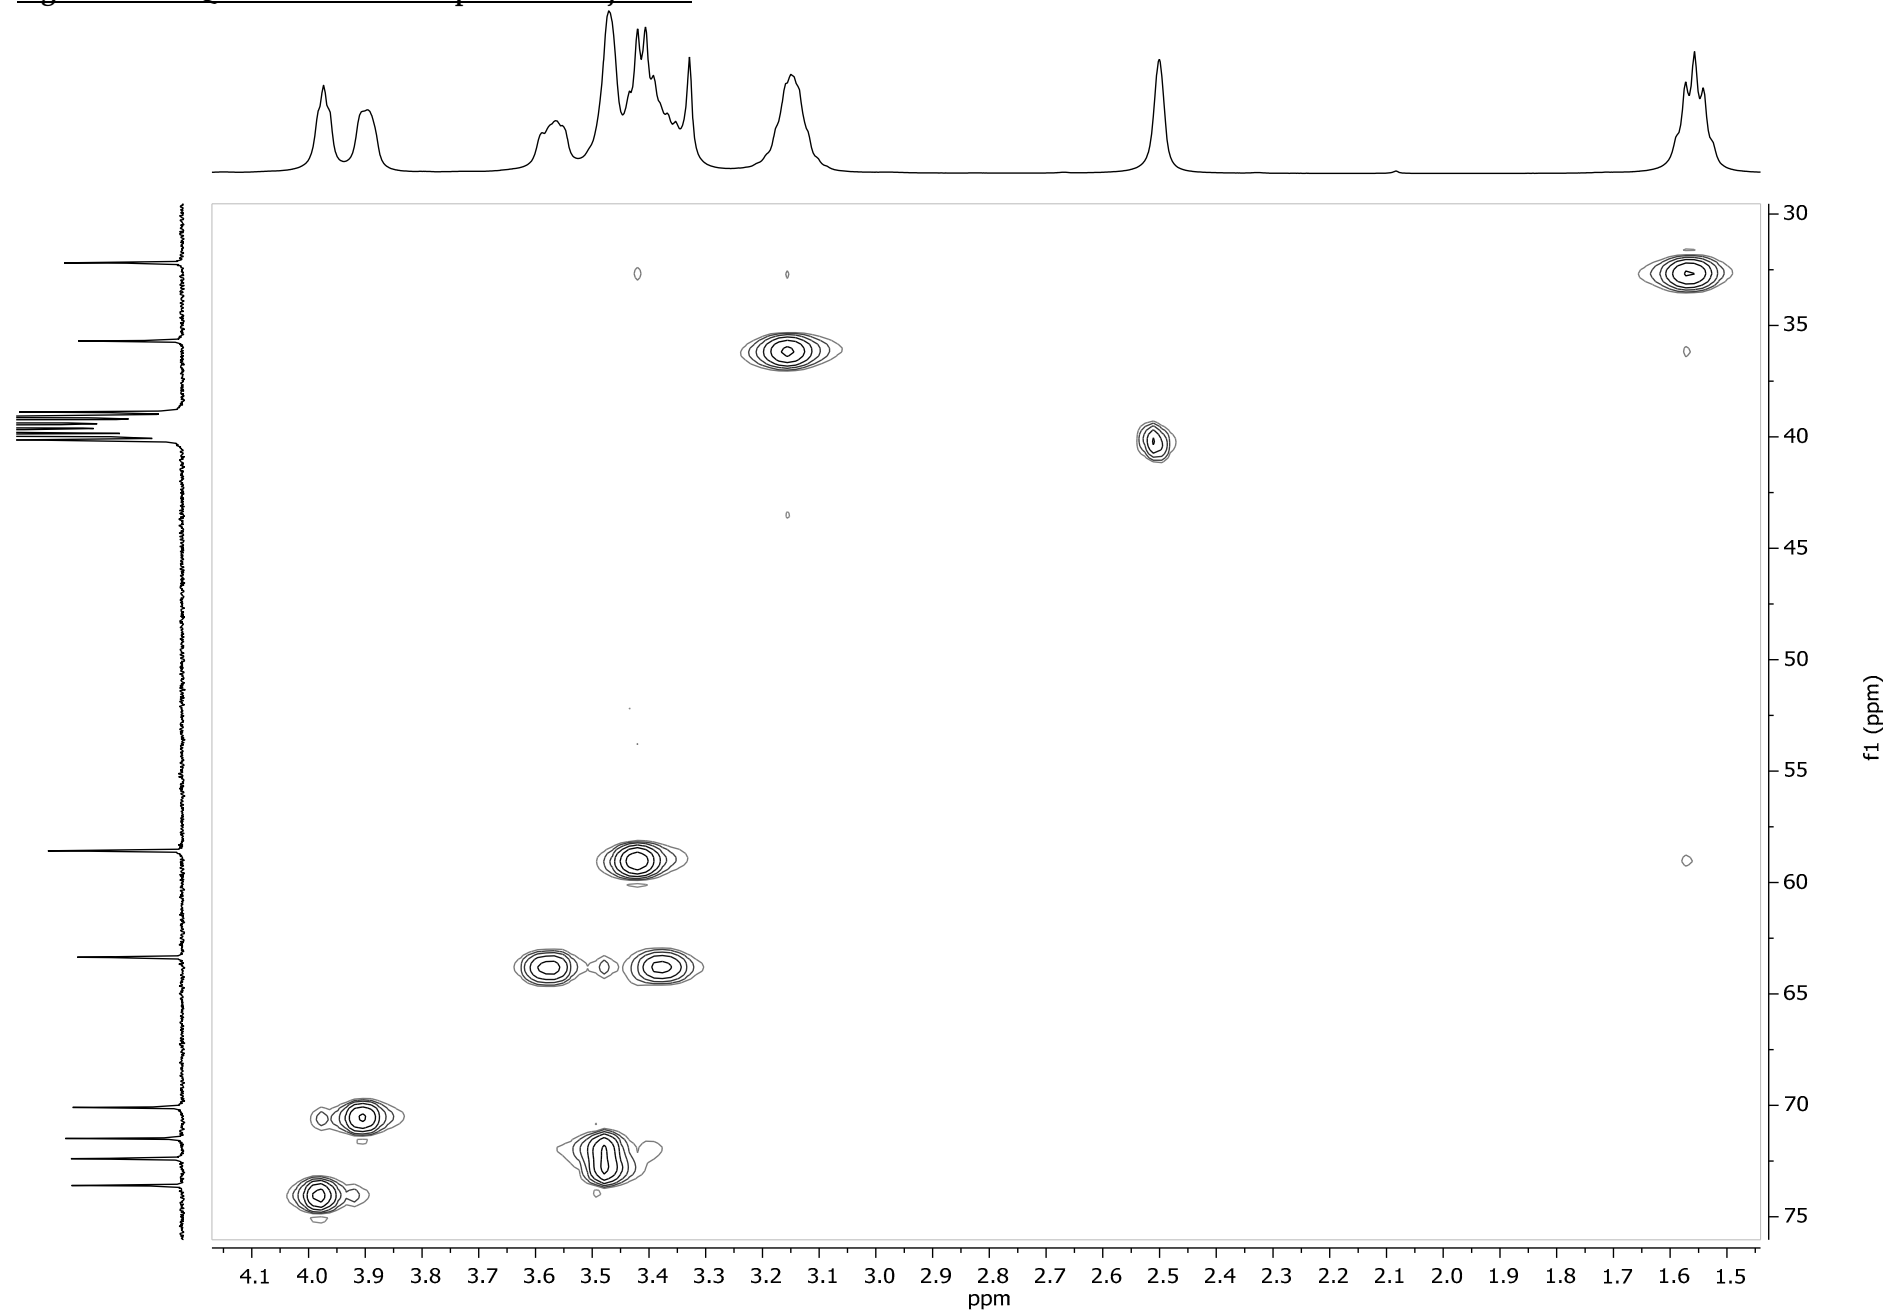

Figure S33: HRMS analysis of 4j crude

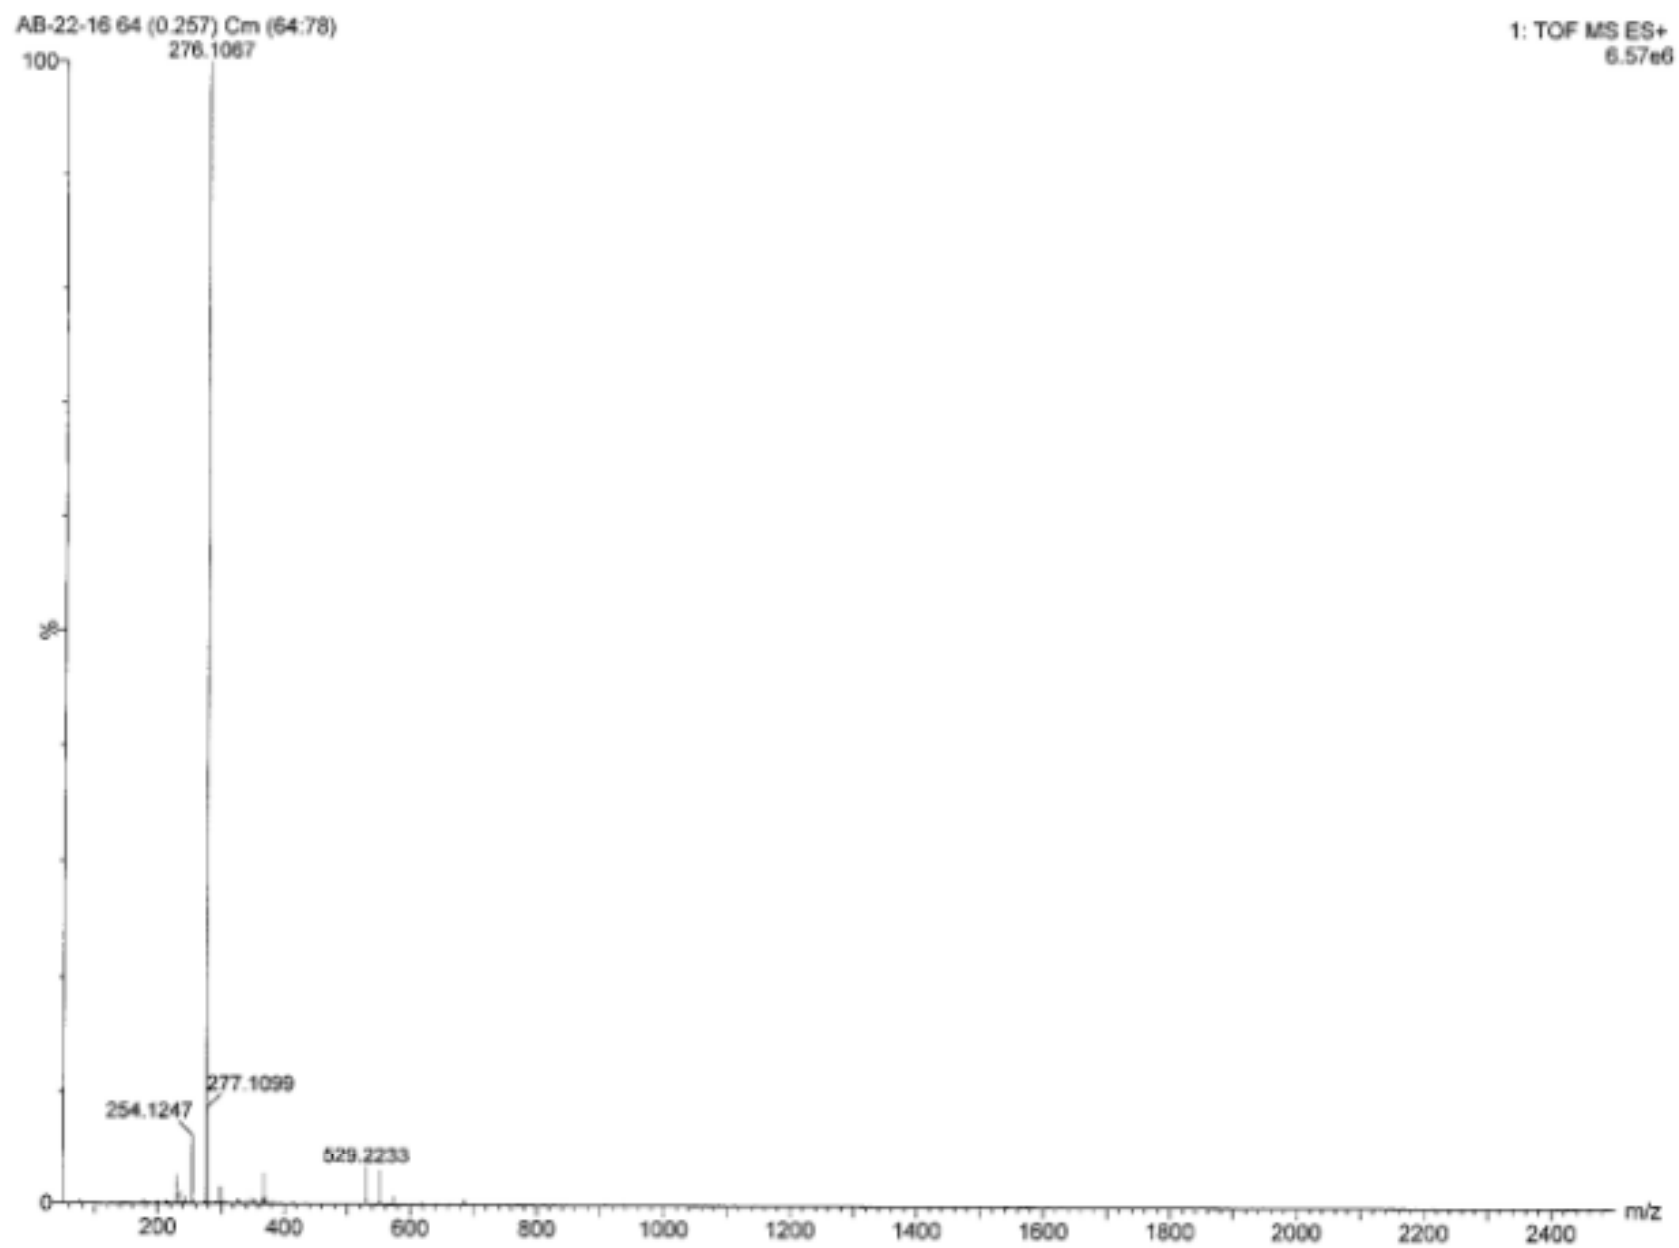

AB-22-16 (0.026) Is (1.00,1.00) C<sub>9</sub>H<sub>19</sub>NO<sub>7</sub>Na

1: TOF MS ES+  
8.87e12

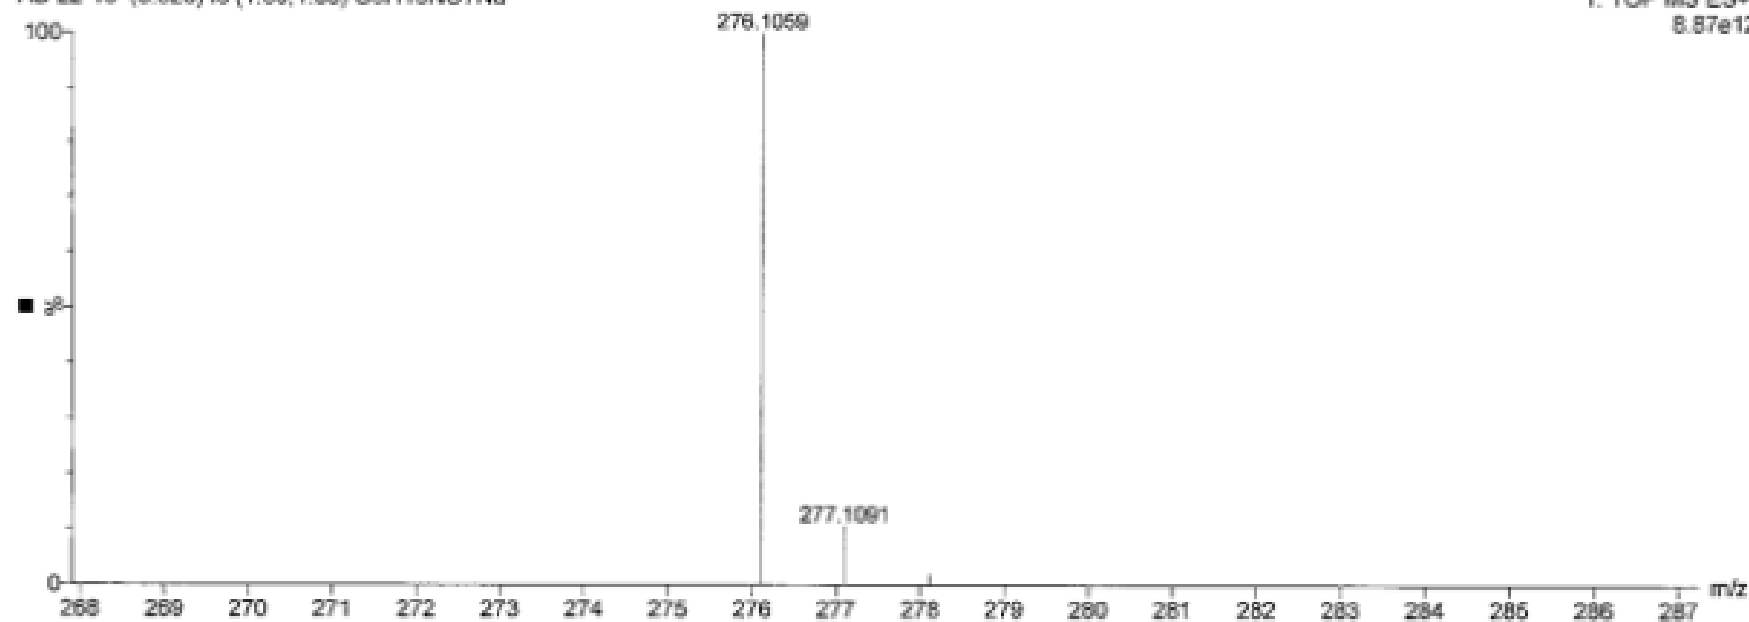

AB-22-16 64 (0.257) Cm (64.78)

1: TOF MS ES+  
6.57e6

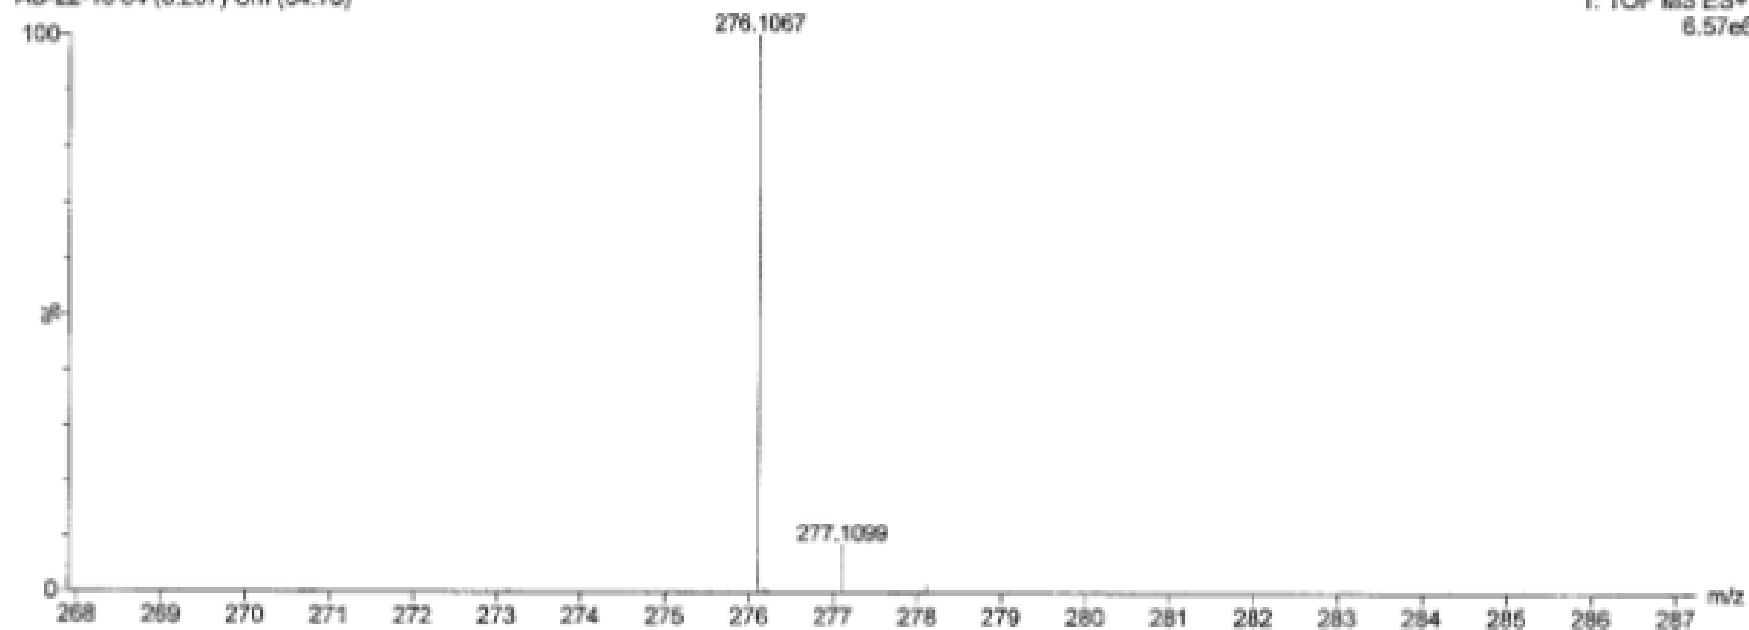

# Elemental Composition Report

Page 1

## Single Mass Analysis

Tolerance = 5.0 PPM / DBE: min = -5.0, max = 150.0

Element prediction: Off

Number of isotope peaks used for i-FIT = 3

Monoisotopic Mass, Even Electron Ions

832 formula(e) evaluated with 3 results within limits (up to 50 closest results for each mass)

Elements Used:

C: 0-50 H: 0-100 N: 0-10 O: 0-50 Na: 0-1

AB-22-16 64 (0.257) Cm (64.76)

1: TOF MS ES+  
6.57e+006

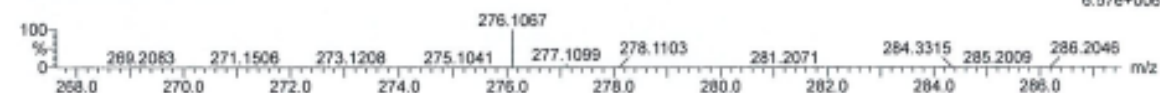

Minimum: -5.0  
Maximum: 5.0 5.0 150.0

| Mass     | Calc. Mass | mDa  | PPM  | DBE | i-FIT  | Norm  | Conf(%) | Formula          |
|----------|------------|------|------|-----|--------|-------|---------|------------------|
| 276.1067 | 276.1073   | -0.6 | -2.2 | 5.5 | 2394.3 | 2.857 | 5.75    | C10 H15 N5 O3 Na |
|          | 276.1059   | 0.8  | 2.9  | 0.5 | 2392.1 | 0.634 | 53.03   | C9 H19 N O7 Na   |
|          | 276.1056   | 1.1  | 4.0  | 4.5 | 2392.3 | 0.886 | 41.22   | C7 H14 N7 O5     |



Figure S34: IR analysis of 4j crude

|              |                      |              |                                                           |                                     |
|--------------|----------------------|--------------|-----------------------------------------------------------|-------------------------------------|
| Title        | AB-22-161            | File Name    | C:\PROGRAM FILES (X86)\LABSOLUTIONS\DATA\ABED\AB-22-16.DX |                                     |
| Date         | 07 Jun 2022 17:00:26 | Technique    | Infrared                                                  | Spectral Region IR                  |
| X Axis       | Wavenumber (cm-1)    | Y Axis       | %Transmittance                                            | Spectrum Range 700.1603 - 4000.3641 |
| Points Count | 1712                 | Data Spacing | 1.9288                                                    |                                     |

AB-22-16.dx

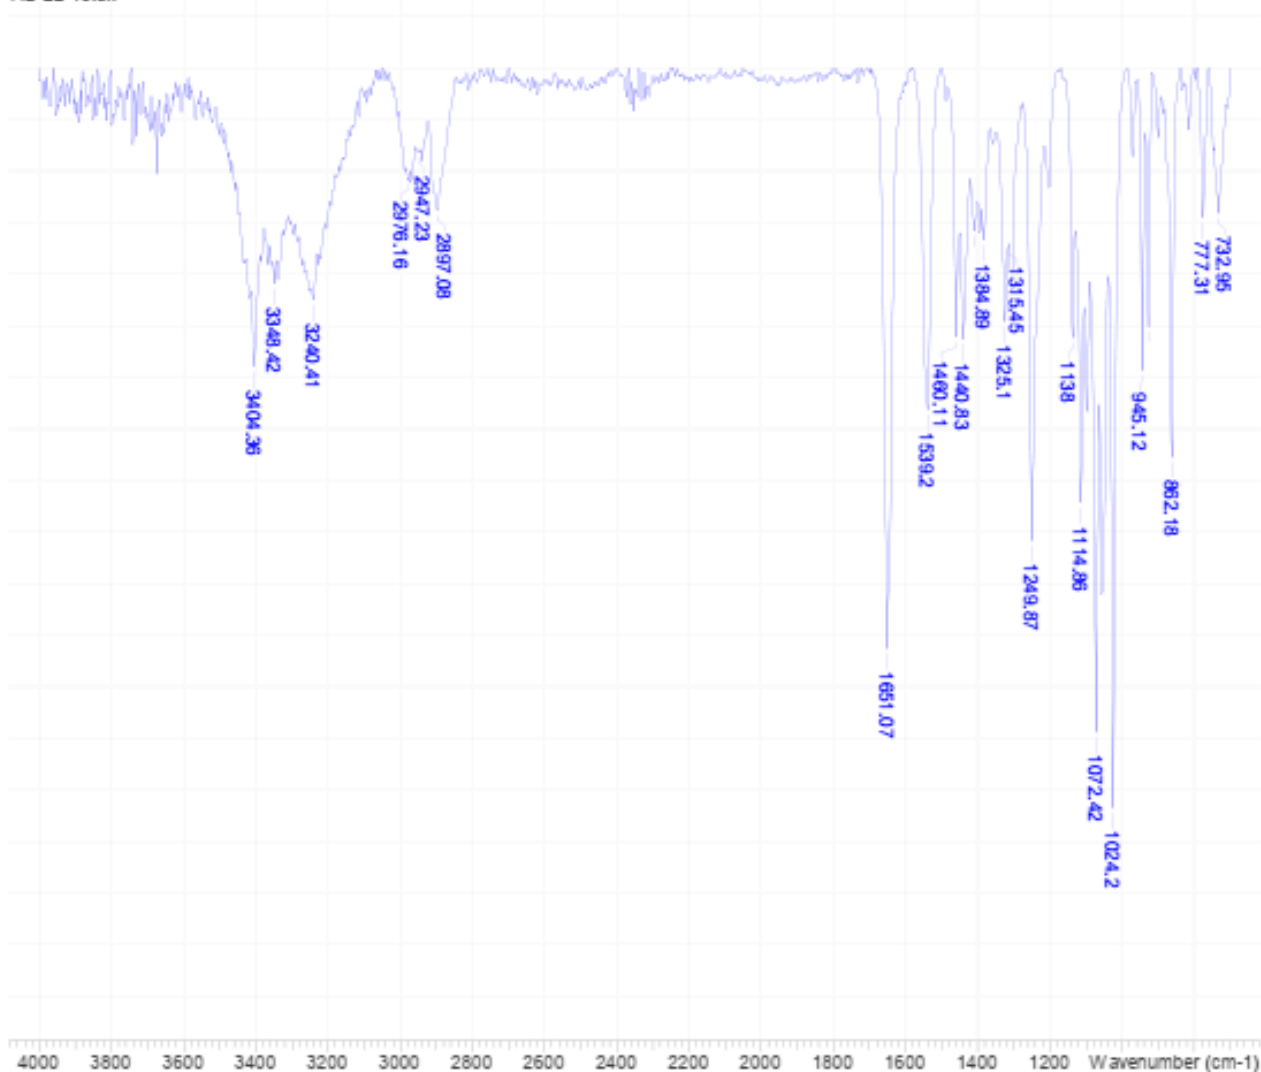

4000 3800 3600 3400 3200 3000 2800 2600 2400 2200 2000 1800 1600 1400 1200 Wavenumber (cm-1)

| No | cm-1    | %T     | FWHH  | Asym | Intensity | No | cm-1    | %T     | FWHH  | Asym | Intensity |
|----|---------|--------|-------|------|-----------|----|---------|--------|-------|------|-----------|
| 1  | 732.95  | 97.185 | -     | -    | W         | 13 | 1384.89 | 96.666 | -     | -    | W         |
| 2  | 777.31  | 97.102 | -     | -    | W         | 14 | 1409.96 | 96.841 | -     | -    | W         |
| 3  | 862.18  | 92.450 | -     | -    | M         | 15 | 1440.83 | 94.736 | -     | -    | M         |
| 4  | 927.76  | 94.976 | -     | -    | M         | 16 | 1460.11 | 94.784 | -     | -    | M         |
| 5  | 945.12  | 94.133 | -     | -    | M         | 17 | 1539.20 | 93.372 | -     | -    | M         |
| 6  | 1024.20 | 85.644 | -     | -    | VS        | 18 | 1651.07 | 88.736 | -1.00 | 0.00 | S         |
| 7  | 1072.42 | 87.118 | -1.00 | 0.00 | S         | 19 | 2897.08 | 97.240 | -     | -    | W         |
| 8  | 1114.86 | 91.577 | -     | -    | M         | 20 | 2947.23 | 98.365 | -     | -    | W         |
| 9  | 1138.00 | 94.767 | -     | -    | M         | 21 | 2976.16 | 97.860 | -     | -    | W         |
| 10 | 1249.87 | 90.830 | -     | -    | S         | 22 | 3240.41 | 95.501 | -     | -    | M         |
| 11 | 1315.45 | 96.593 | -     | -    | W         | 23 | 3348.42 | 95.817 | -     | -    | W         |
| 12 | 1325.10 | 95.080 | -     | -    | M         | 24 | 3404.36 | 94.214 | -     | -    | M         |

**Figure S35: <sup>1</sup>H NMR spectrum of 4k crude**

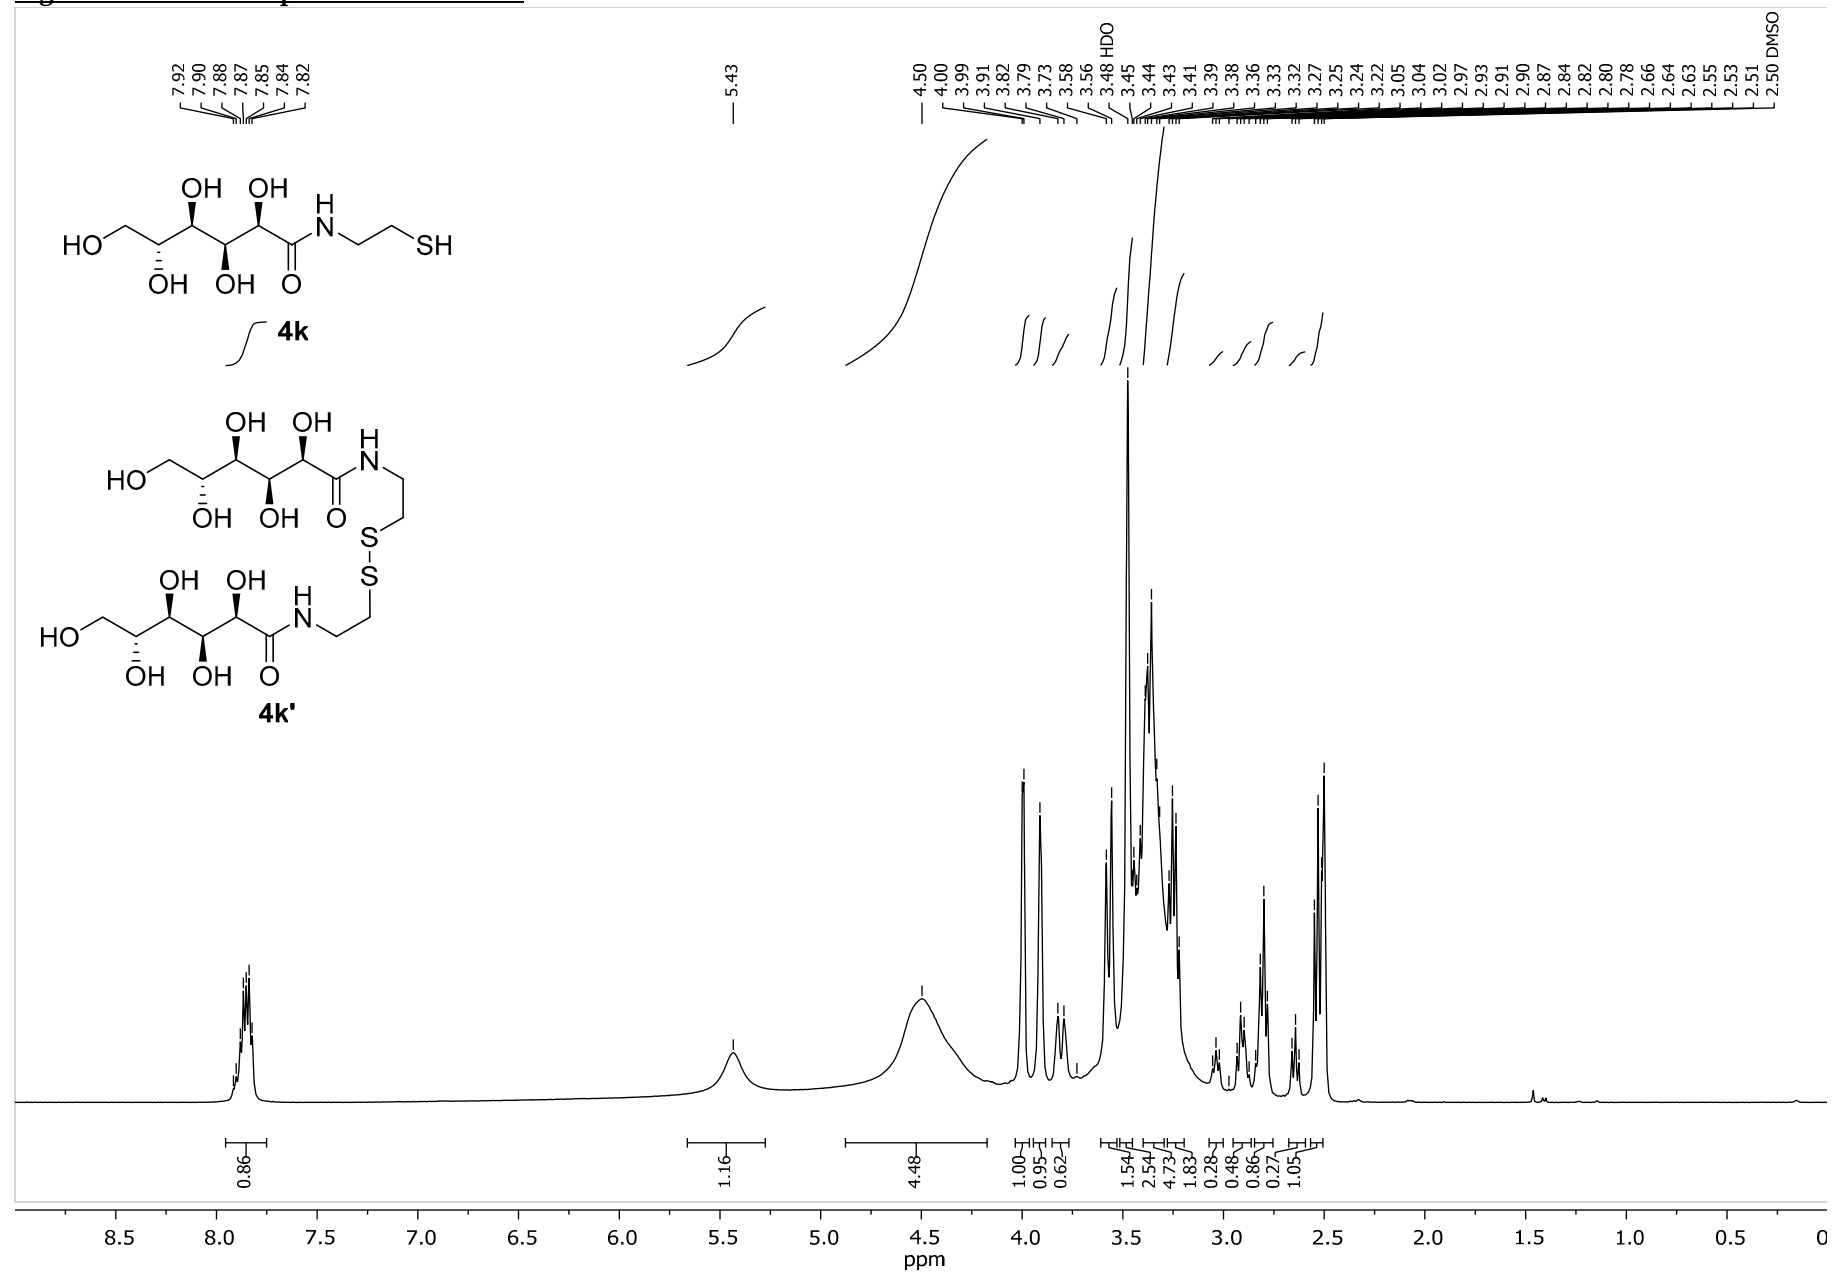

**Figure S36:  $^{13}\text{C}$  NMR spectrum of 4k crude**

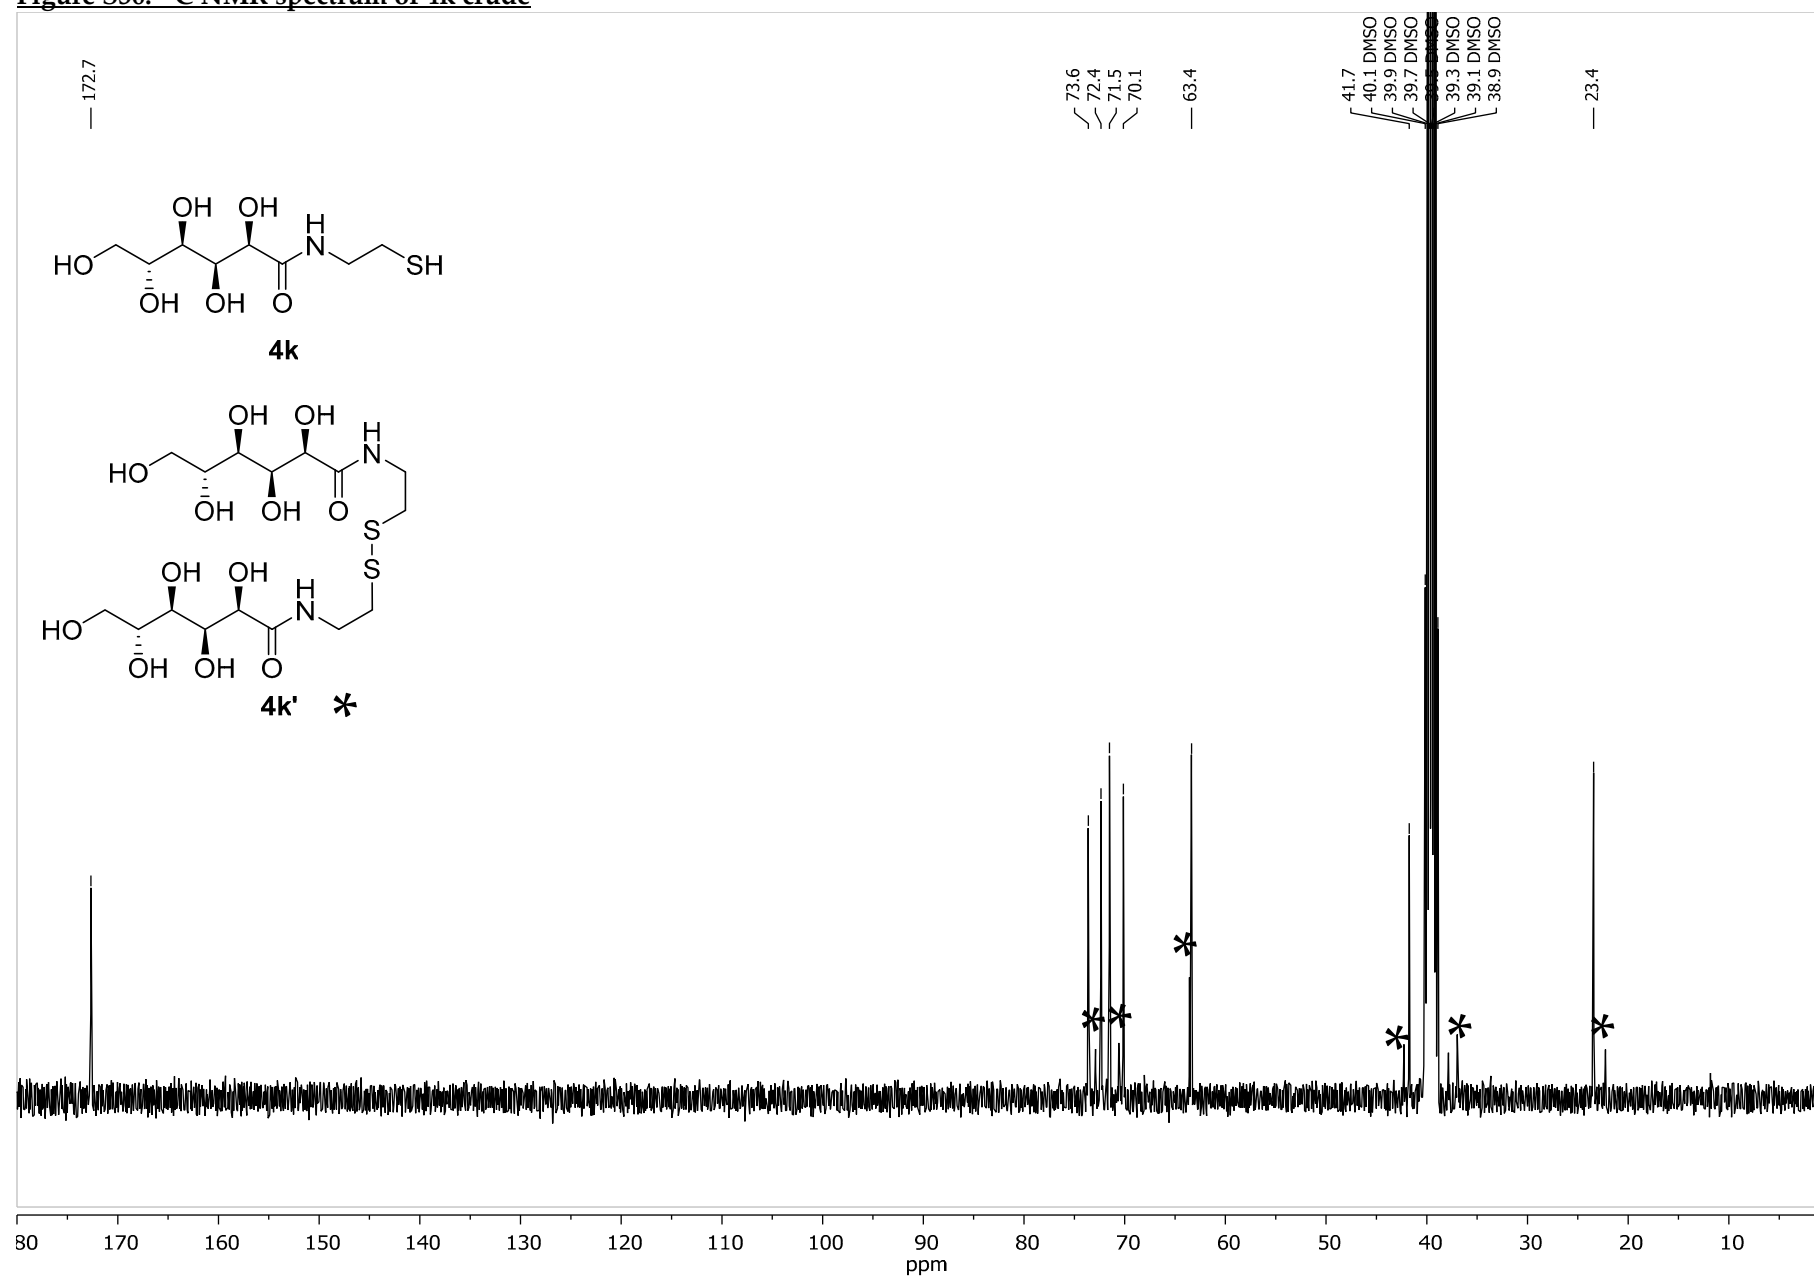

**Figure S37: <sup>1</sup>H NMR spectrum of 4l crude**

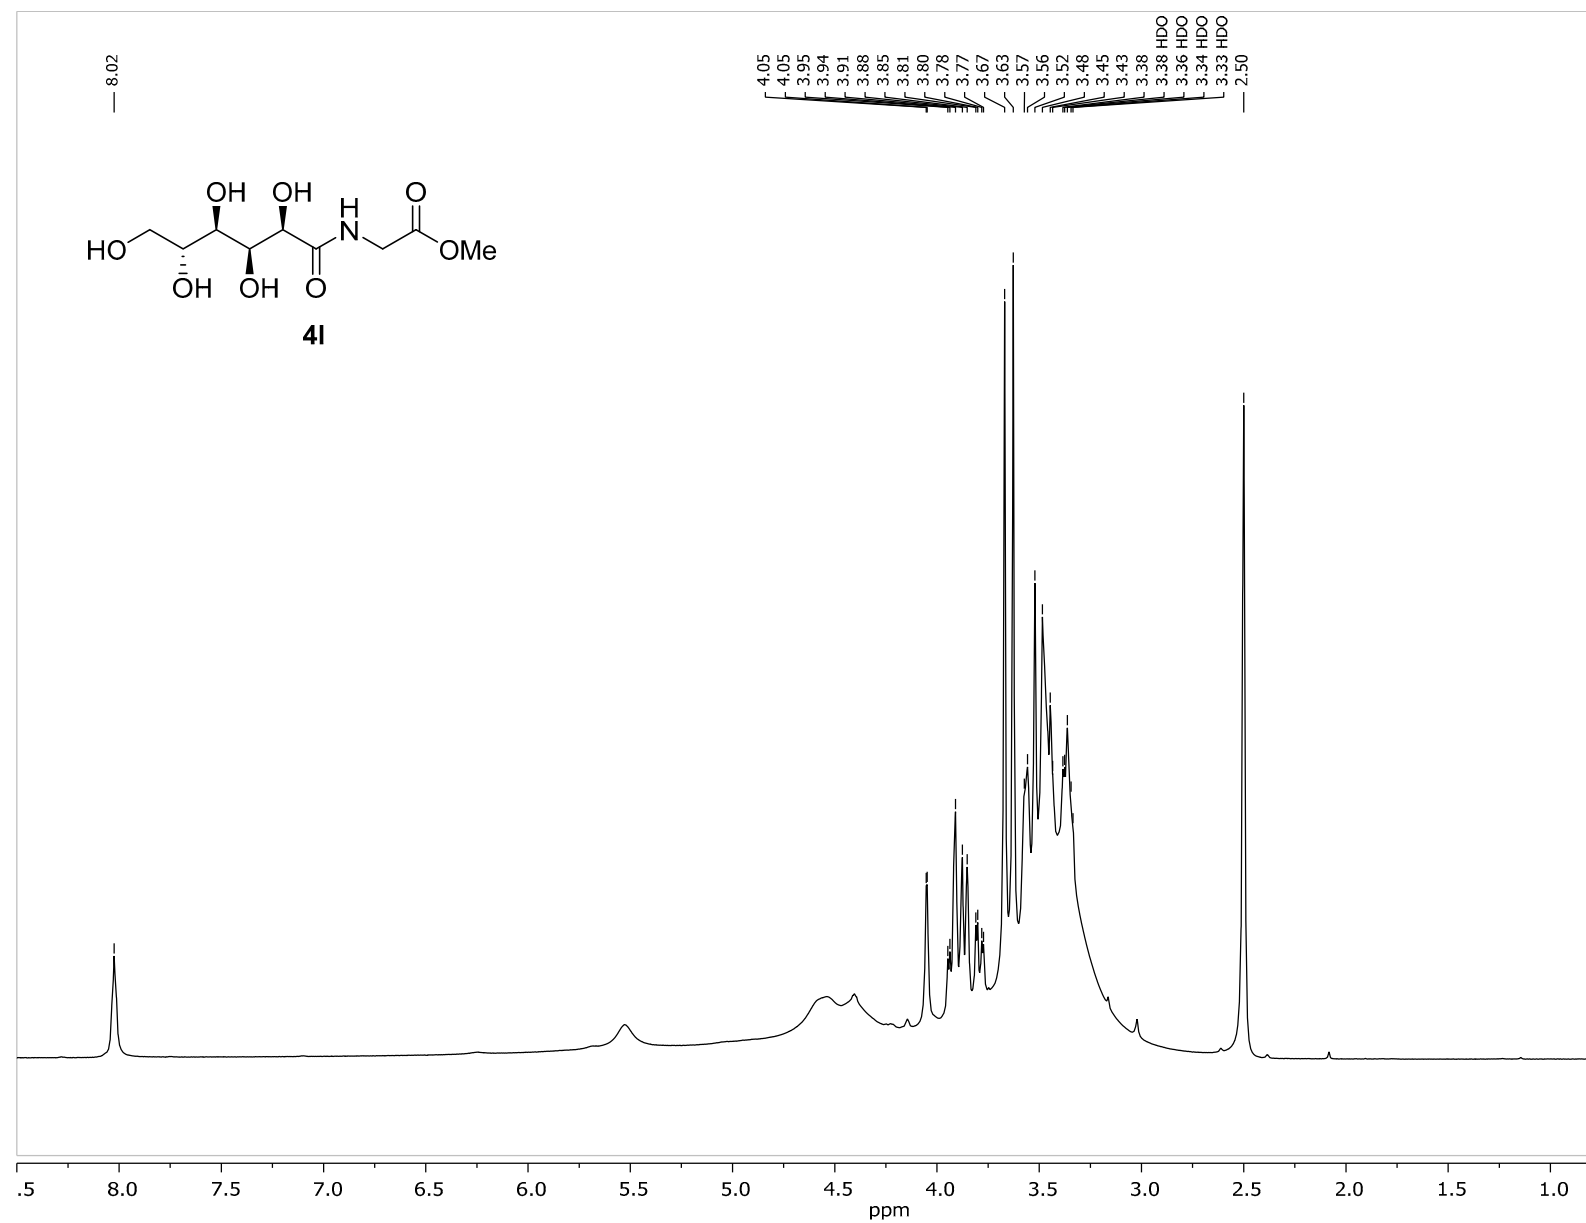

**Figure S38:**  $^{13}\text{C}$  NMR spectrum of **4l** crude

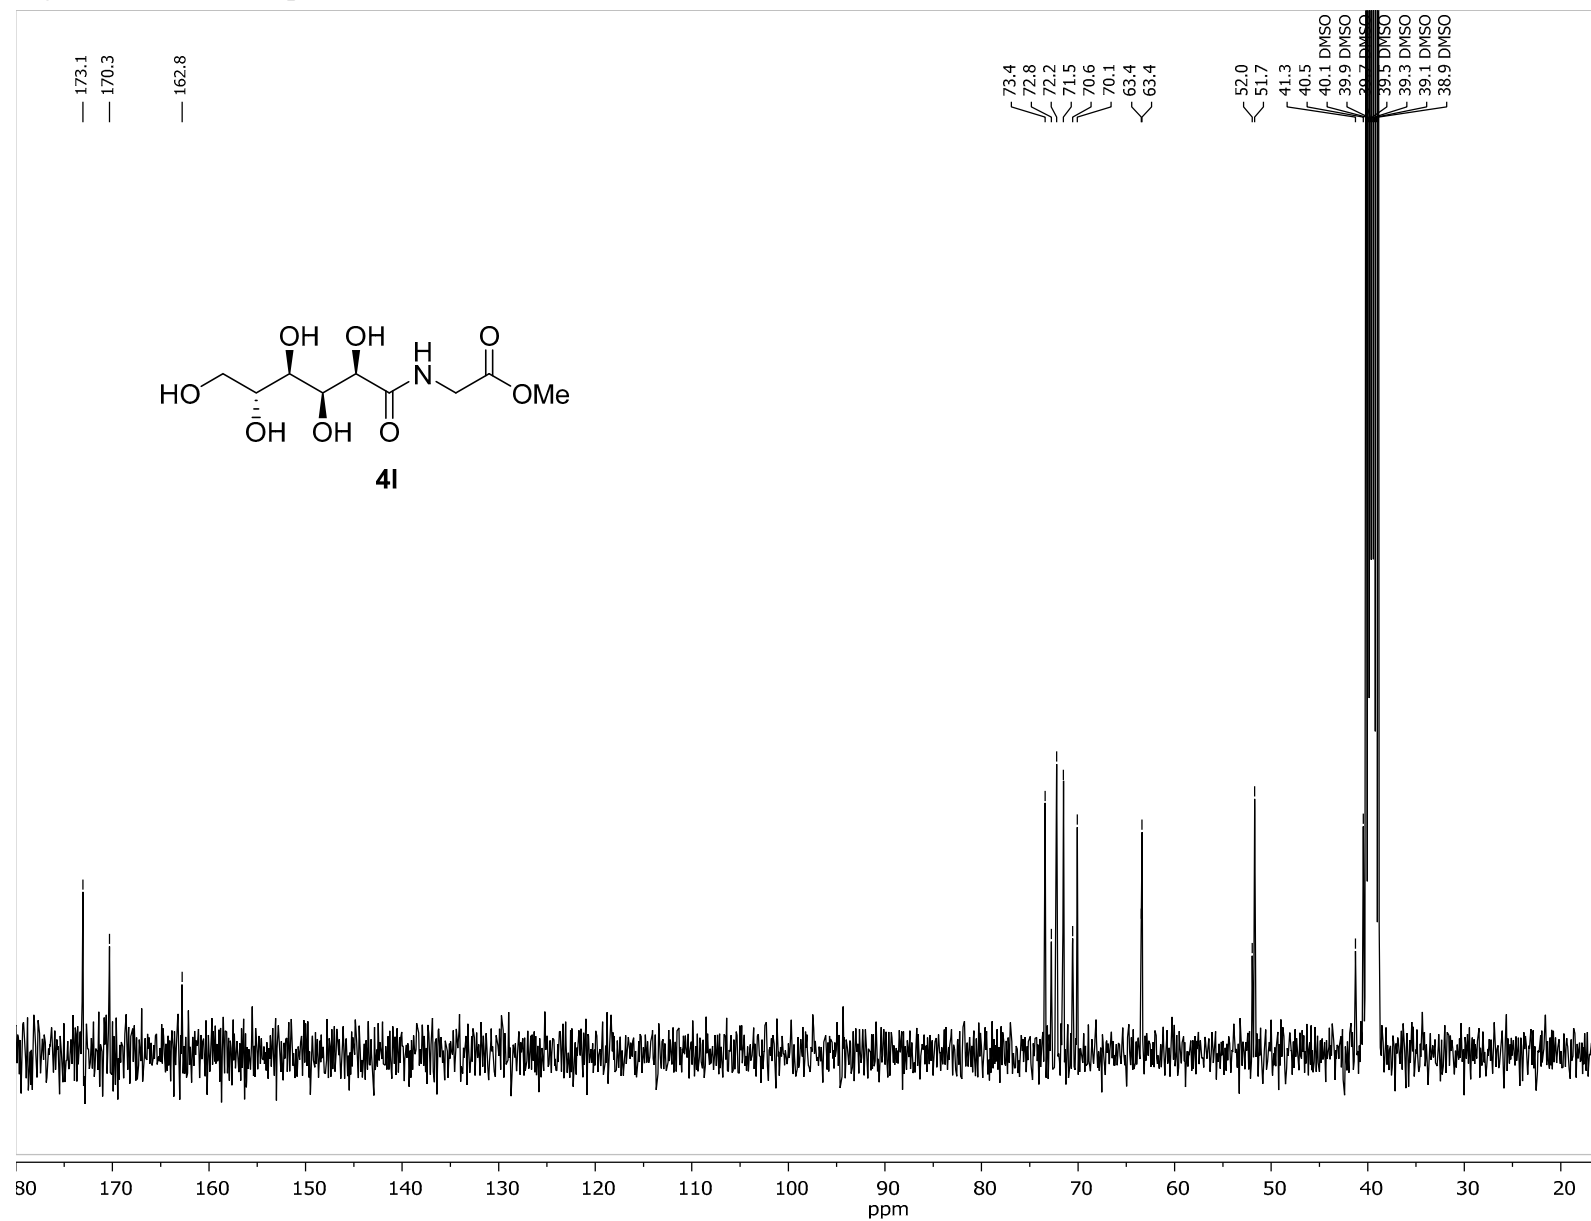

Supplement: s1 [file s1]
